# Supplementary material for: Building a cobaloxime-based metal–organic framework for photocatalytic aerobic oxidation of arylboronic acids to phenols
Source: Royal Society of Chemistry journal article supplement (doi:10.1039/d2cc06945h), 2023-01-01
Supplement: d2cc06945h1.pdf [file d2cc06945h1.pdf]

## ***Electronic Supplementary Information***

### **Building cobaloxime-based metal-organic framework for photocatalytic aerobic oxidation of arylboronic acids to phenols**

Yonghong Xiao,<sup>†a</sup> Can-Ming Zhu,<sup>†a</sup> Rong-Bin Liang,<sup>a</sup> Yong-Liang Huang,<sup>c</sup> Chun-Hua Hai,<sup>a</sup> Jian-Rui Chen,<sup>a</sup> Mian Li,<sup>a,b</sup> Jian-Ji Zhong<sup>\*a,b</sup> and Xiao-Chun Huang<sup>\*a,b</sup>

- a Y. Xiao, C.-M. Zhu, R.-B. Liang, C.-H. Hai, J.-R. Chen, M. Li, Prof. J.-J. Zhong, Prof. X.-C. Huang  
Department of Chemistry and Key Laboratory for Preparation and Application of Ordered Structural Materials of Guangdong Province, Shantou University, Guangdong 515063 (China)  
E-mail: jjzhong@stu.edu.cn, xchuang@stu.edu.cn
- b M. Li, Prof. J.-J. Zhong, Prof. X.-C. Huang  
Chemistry and Chemical Engineering Guangdong Laboratory, Shantou 515031 (China)
- c Dr. Y.-L. Huang  
Department of Medicinal Chemistry, Shantou University Medical College, Shantou, Guangdong 515041, China.

<sup>†</sup> The two authors contributed equally to this work

## Table of Contents

|     |                                                             |    |
|-----|-------------------------------------------------------------|----|
| 1.  | Materials .....                                             | 1  |
| 2.  | Instruments and methods .....                               | 1  |
| 3.  | Topology analysis of Zr-based metal-organic frameworks..... | 3  |
| 4.  | Synthesis of Zr-TCPCo .....                                 | 4  |
| 5.  | Single crystal X-ray crystallography of Zr-TCPCo.....       | 6  |
| 6.  | SEM and EDS mapping analysis of Zr-TCPCo.....               | 10 |
| 7.  | XPS test of Zr-TCPCo.....                                   | 11 |
| 8.  | Stability test .....                                        | 13 |
| 8.1 | Thermostability .....                                       | 13 |
| 8.2 | Chemical stability .....                                    | 15 |
| 8.3 | Air and water stability .....                               | 17 |
| 9.  | IR test of Zr-TCPCo .....                                   | 18 |
| 10. | K-M function plot of Zr-TCPCo.....                          | 19 |
| 11. | Mott-Schottky test .....                                    | 19 |
| 12. | Cyclic voltammetry analysis .....                           | 20 |
| 13. | General procedure for the photochemical reactions .....     | 21 |
| 14. | Characterization data of the products .....                 | 22 |
| 15. | NMR spectra for the products .....                          | 32 |
| 16. | Single crystal X-ray crystallography of product b21 .....   | 59 |
| 17. | UV-Vis spectrum of the recycled Zr-TCPCo .....              | 60 |
|     | References.....                                             | 61 |

## 1. **Materials**

Analytical reagents were purchased from Guangdong Guanghua Sci-Tech Co., Ltd. (Shantou, China) and Energy Chemical (Shanghai, China) and used without further purification. The water involved in the experiment is self-made reverse osmosis water in the lab.

## 2. **Instruments and methods**

**Single crystal X-ray diffraction (SC-XRD)** tests were performed on Rigaku XtaLab Pro MM007HF DW X diffractometer at ambient temperature.

**Powder X-ray diffraction (PXRD)** data were collected on Rigaku MiniFlex600 diffractometer using Cu K $\alpha$  radiation. Patterns were scanned over 2-30° (2 $\theta$ ) with a scan speed of 10°/min and a step width of 0.02°, respectively (Environment: 25 °C, 50% humidity).

**Temperature-dependent powder X-ray diffraction (TD-PXRD)** patterns were recorded on Rigaku Ultima IV X-ray diffractometer equipped with graphite-monochromatic Cu K $\alpha$  radiation ( $\lambda = 1.54178 \text{ \AA}$ ) in nitrogen flow at various temperatures.

The morphology of Zr-TCPCo was investigated by using ZEISS Gemini 300 field-emission **scanning electron microscope (SEM)** with an acceleration voltage of 5 kV. EDS mapping analysis was conducted on the same microscope with an voltage of 15 kV.

**Infrared spectra (IR)** were measured from 400 cm<sup>-1</sup> to 4000 cm<sup>-1</sup> by Nicolet AVATAR 360 in transition mode. Samples were diluted in KBr pellets.

**Gas adsorption** was performed on a ASAP2020 instrument (Micrometrics). Before starting the test, about 120 mg of Zr-TCPCo was degassed at 120 °C for 1 day under dynamic vacuum after 6 days of solvent exchange with DMF and acetone (final mass: 117.2 mg). The surface areas were calculated from the N<sub>2</sub> adsorption isotherms data by applying the linearized BET equation (selective data range: P/P<sub>0</sub> = 0.001~0.05,

with a correlation coefficient of 0.999 and a C value equal to 444.36). Pore size distributions were obtained using NLDFT method.

**Diffuse reflection spectra (Solid state UV-Vis spectra)** were recorded on PerkinElmer Lambda 950 spectrophotometer using BaSO<sub>4</sub> as a reference. Scans were measured from 800 nm to 300 nm with a scan width of 0.5 nm.

**X-ray photoelectron spectroscopy (XPS)** test was performed on was collected on an Escalab 250XiXPS energy spectrometer using Al K $\alpha$  radiation. **Thermogravimetric analysis (TGA)** was performed on the TA Instruments Q50 thermogravimetric instrument under N<sub>2</sub> flow (40 mL·min<sup>-1</sup>) and heated from room temperature to 600 °C at a rate of 10 °C min<sup>-1</sup>.

**Electrochemical measurements** were recorded on a CHI660E electrochemical workstation (CH Instruments, China). A standard three-electrode system with platinum mesh as the counter electrode, the Ag/AgCl electrode as the reference electrode, and Zr-TCPCo loading on FTO (ink: 5 mg MOF + 0.8 mL EtOH + 0.2 mL Nafion solution, 10  $\mu$ L on 1×1 cm<sup>2</sup>) as the working electrode, respectively. 0.1 M Na<sub>2</sub>SO<sub>4</sub> aqueous solution is used as the electrolyte. **Cyclic voltammetry (CV)** measurements were conducted starting from OCP (0.2 V vs Ag/AgCl) and scanning from -1.3 to 1 V vs Ag/AgCl. The scan rate was set at 50 mV/s and the test was conducted for 5 full circles. **AC Impedance measurement (IMPE)** for the Mott-Schottky plot was tested from 0.6 V to -0.6 V vs Ag/AgCl.

**Nuclear Magnetic Resonance (NMR)** was recorded on the Bruker Ascend™ 400 MHz NMR spectrometer with tetramethylsilane (TMS) as an internal standard.

**High-Resolution Mass Spectra (HRMS)** were recorded using a Q Exactive mass spectrometer (Thermo Fisher Scientific, USA).

**Irradiation** with visible light was performed using blue LEDs ( $\lambda = 450 \pm 10$  nm) illumination instruments (The instruments were designed by ourselves and the actual output power density of the LEDs at 0.5 cm distance is 33.70 mW/cm<sup>2</sup> detected by CEL-NP2000-10 (Beijing Ceau Light Co. Ltd., China) light power meter). The

material of the reaction vessel is common glass; the distance from the light source is about 0.5 cm.

### 3. *Topology analysis of Zr-based metal-organic frameworks*

The topological analysis of Zr-TCPCo was performed by using the computer program Systre<sup>[1]</sup> and the online database Reticular Chemistry Structure Resource (RCSR).<sup>[2]</sup>

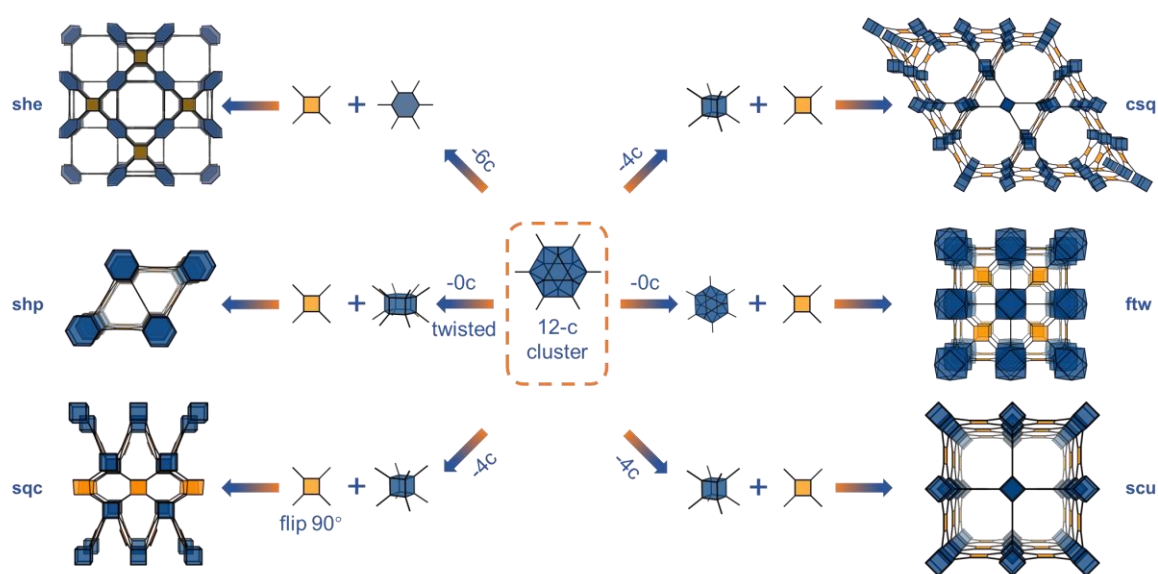

**Scheme S1. Possible networks constructed from planar 4-c ligand and hexanuclear zirconium node with different connectivity. Blue polyhedra and orange squares represent metal clusters and ligands, respectively. -xc (x=0, 4, 6) represents the number of reduced connectivity.**

#### 4. **Synthesis of Zr-TCPCo**

The molecular cobaloxime complex was synthesized based on a previously reported procedure.<sup>[3]</sup>

26 mg of  $\text{ZrCl}_4$ , 0.5 mL *N,N*-dimethylformamide (DMF) and 2 mL of acetic acid (HOAc) were added into a 20 mL vial, which was tightly capped after addition. The glass bottle was heated at 60 °C until all materials were completely dissolved. Next, 30 mg of cobaloxime complex was added to the above-mentioned transparent solution while hot. After ultrasonication for seconds, a dark green solution formed. The vial was subsequently heated at 120 °C for 24 h to obtain yellow-orange crystals. The crystals were filtered, washed with DMF adequately and preserved in DMF for subsequent characterization.

This procedure can be performed in a ten-time scale by using a 100 mL Duran-Schott vial (See Figure S1).

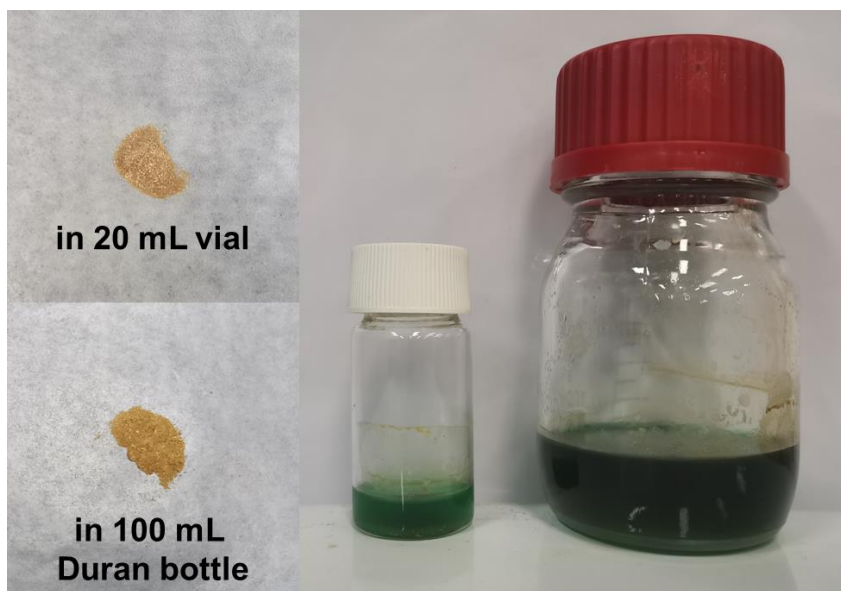

**Figure S1. Pictures of small and large scale synthesis of Zr-TCPCo and the final products.**

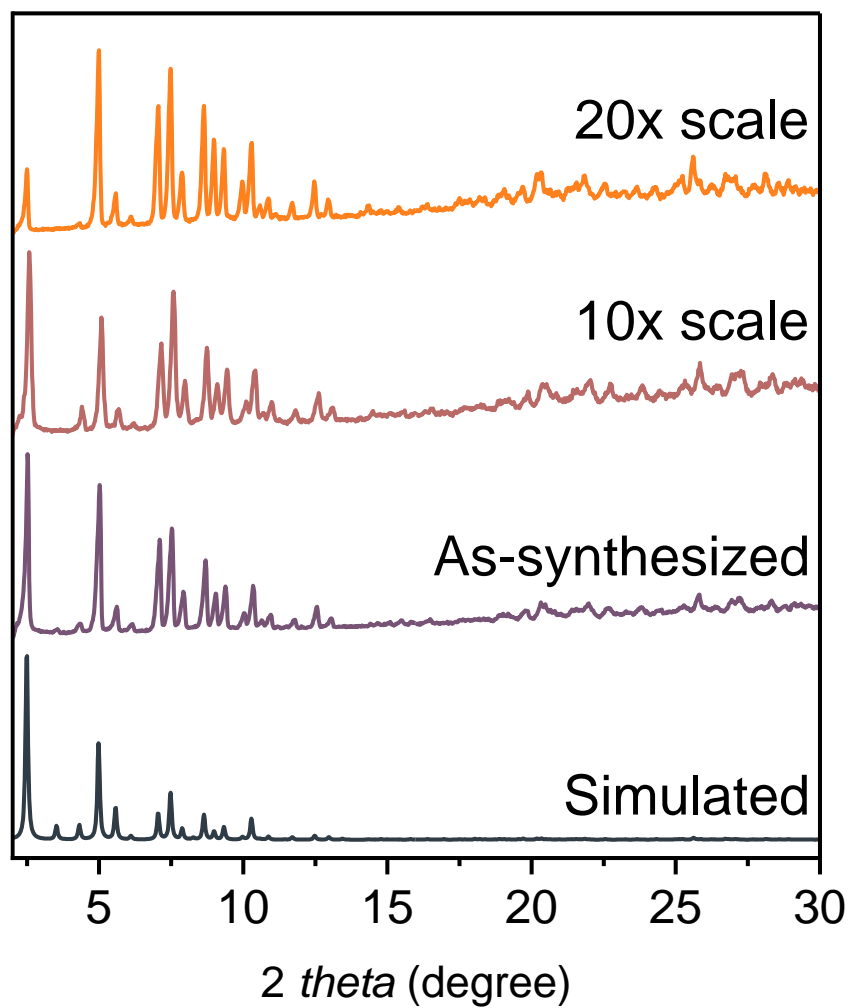

Figure S2. PXRD patterns of Zr-TCPCo synthesized in different scales.

## 5. *Single crystal X-ray crystallography of Zr-TCPCo*

Single crystals of Zr-TCPCo were transferred to a microscope slide along with a little mother liquor. A small piece of crystal (about 0.1×0.15×0.2 mm<sup>3</sup>) was picked and washed completely in vacuum grease, then mounted using a Dual-Thickness MicroLoop<sup>TM</sup> (**MiTeGen, Ithaca, New York, USA**).

Data collection was performed on Rigaku Oxford XtaLAB Pro diffractometer equipped with a micro focus sealed X-ray tube (Cu K $\alpha$  radiation,  $\lambda = 1.54178 \text{ \AA}$ ) and PILATUS 200K detector. Data reduction, absorption correction was conducted on CrysAlisPro (Rigaku, V1.171.39.7e, 2015). Absorption correction was based on implanted spherical harmonics in SCALE3 ABSPACK.

The structure was solved by the intrinsic phasing method using *SHELXT*<sup>[4]</sup> implanted in *Olex2*.<sup>[5]</sup> Refinement with full matrix least squares techniques on  $F^2$  was performed by using *SHELXL*.<sup>[6]</sup> Non-hydrogen atoms were refined anisotropically and all hydrogen atoms were generated based on riding mode. Crystallographic data and structure refinement results are given in Table S1. Atomic coordinates and isotropic displacement parameters are shown in Table S2.



**Table S1. Crystallographic data of Zr-TCPCo**

| Complex                 | Zr-TCPCo                                                                                                          |
|-------------------------|-------------------------------------------------------------------------------------------------------------------|
| CCDC No.                | 2222381                                                                                                           |
| Formula                 | C <sub>80</sub> H <sub>68</sub> Cl <sub>2</sub> Co <sub>2</sub> N <sub>8</sub> O <sub>52.67</sub> Zr <sub>8</sub> |
| Formula weight          | 2902.61                                                                                                           |
| Temperature (K)         | 200                                                                                                               |
| Crystal system          | Cubic                                                                                                             |
| Space group             | $Pm\bar{3}m$                                                                                                      |
| $a/\text{\AA}$          | 35.2672(2)                                                                                                        |
| $V/\text{\AA}^3$        | 43864.5(7)                                                                                                        |
| $Z$                     | 6                                                                                                                 |
| $D_c/\text{g cm}^{-3}$  | 0.659                                                                                                             |
| reflns coll.            | 50465                                                                                                             |
| unique reflns           | 8113                                                                                                              |
| $R_{\text{int}}$        | 0.0358                                                                                                            |
| $R_1 [I > 2\sigma(I)]$  | 0.0692                                                                                                            |
| $wR_2 [I > 2\sigma(I)]$ | 0.2155                                                                                                            |
| $R_1$ (all data)        | 0.0770                                                                                                            |
| $wR_2$ (all data)       | 0.2250                                                                                                            |
| GOF                     | 1.085                                                                                                             |

**Table S2. Atomic coordinates ( $\times 10^4$ ) and equivalent isotropic displacement parameters ( $\text{\AA}^2 \times 10^3$ ) for Zr-TCPCo. U(eq) is defined as one third of the trace of the orthogonalized  $U_{ij}$  tensor.**

|      | x          | y          | z          | U(eq)    |
|------|------------|------------|------------|----------|
| Zr1  | 3435.2(2)  | 6564.8(2)  | 7268.9(2)  | 56.1(5)  |
| Zr2  | 2499.6(2)  | 6795.6(2)  | 7500.4(2)  | 62.1(5)  |
| Co1A | 0          | 5000       | 6875.7(8)  | 41.4(7)  |
| O3   | 3317.3(15) | 6682.7(15) | 6682.7(15) | 65(2)    |
| O4   | 2607.6(14) | 7392.4(14) | 7392.4(14) | 65.2(18) |
| O6   | 2253.3(8)  | 6190.9(9)  | 6726.9(10) | 72.5(9)  |
| O5   | 2118.3(8)  | 6326.7(9)  | 7339.3(10) | 76.0(10) |
| O8A  | 2868.5(15) | 6330(2)    | 7131.5(15) | 46.4(12) |
| O7A  | 3090.1(14) | 6909.9(14) | 7504(2)    | 44.4(12) |
| N1A  | 408.0(16)  | 5341.6(15) | 6861.1(18) | 44.0(7)  |
| O2   | 2987(4)    | 5989(4)    | 6563(4)    | 131(3)   |
| C5   | 2059.7(11) | 6158.8(12) | 7025.7(15) | 67.0(12) |
| O9A  | 350.8(13)  | 5724.0(13) | 7054.2(16) | 48.7(9)  |
| O10A | 0          | 5000       | 7493(3)    | 50.6(13) |
| O1   | 1900(4)    | 7513(4)    | 7077(4)    | 132(2)   |
| C11A | 738(2)     | 5209.0(19) | 7032(2)    | 43.1(8)  |
| C11  | 1560(4)    | 5813(4)    | 6658(5)    | 75(3)    |
| C10  | 1234(4)    | 5593(4)    | 6642(5)    | 83(3)    |
| C7   | 1579(4)    | 5748(5)    | 7330(5)    | 91(5)    |
| C8   | 1255(4)    | 5508(5)    | 7300(6)    | 101(5)   |
| C4   | 3292(4)    | 5863(3)    | 6782(3)    | 130(2)   |
| C1   | 1356(3)    | 7359(4)    | 7475(4)    | 132(2)   |
| C3   | 3384(4)    | 5448(3)    | 6682(5)    | 131(2)   |
| C2   | 1785(3)    | 7283(3)    | 7369(3)    | 131(2)   |
| O8B  | 2837.6(18) | 6554(3)    | 7162.4(18) | 63(2)    |

|      |            |            |            |          |
|------|------------|------------|------------|----------|
| O7B  | 3052(2)    | 6948(2)    | 7722(3)    | 72(2)    |
| Cl1A | 0          | 5000       | 6238(3)    | 55.2(12) |
| Co1B | 0          | 5000       | 7030.6(8)  | 40.4(7)  |
| N1B  | 404.6(15)  | 5349.1(15) | 7043.5(18) | 43.1(7)  |
| O9B  | 353.6(13)  | 5709.7(13) | 6835.4(16) | 48.7(8)  |
| O10B | 0          | 4865(4)    | 7623(3)    | 46.3(12) |
| C1A  | 742.1(19)  | 5202.0(19) | 6876(2)    | 42.6(8)  |
| Cl1B | 0          | 5000       | 6397(3)    | 54.7(12) |
| C8A  | 1158.8(13) | 5652.4(16) | 7301.6(13) | 93(3)    |
| C7A  | 1478.4(14) | 5882.3(16) | 7320.6(12) | 91(3)    |
| C6   | 1727.3(8)  | 5899.3(10) | 7015.5(13) | 71.3(11) |
| C12  | 1656.6(12) | 5686.5(16) | 6691.4(12) | 85(3)    |
| C10A | 1337.0(13) | 5456.6(15) | 6672.4(13) | 92(3)    |
| C9   | 1088.1(8)  | 5439.6(9)  | 6977.5(14) | 76.2(12) |
| O7   | 3544(3)    | 5983(2)    | 7061(3)    | 95.6(18) |
| O8   | 1927(3)    | 7007(3)    | 7600(4)    | 109(2)   |
| Cl2  | 0          | 5192.8(14) | 6342(3)    | 102(3)   |

## 6. SEM and EDS mapping analysis of Zr-TCPCo

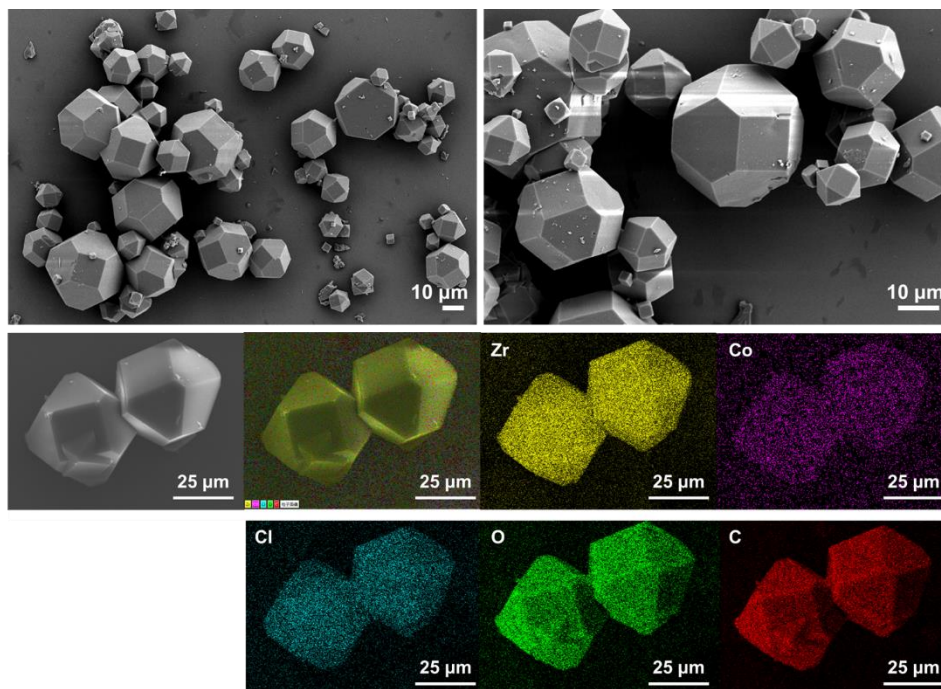

Figure S3. SEM and EDS analysis of Zr-TCPCo before catalysis.

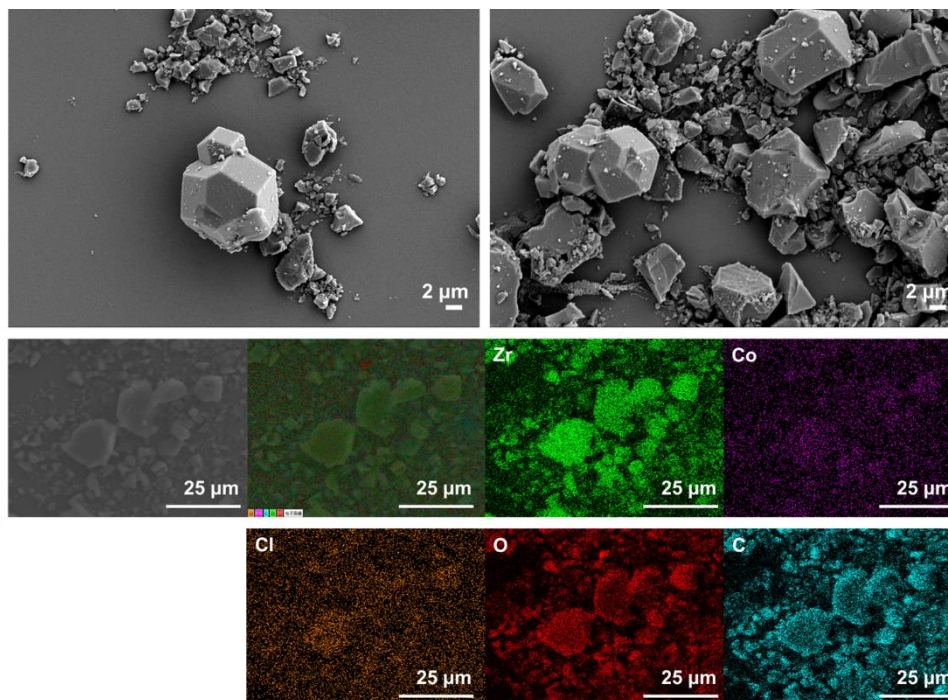

Figure S4. SEM and EDS analysis of Zr-TCPCo after catalysis.

## 7. XPS test of Zr-TCPCo

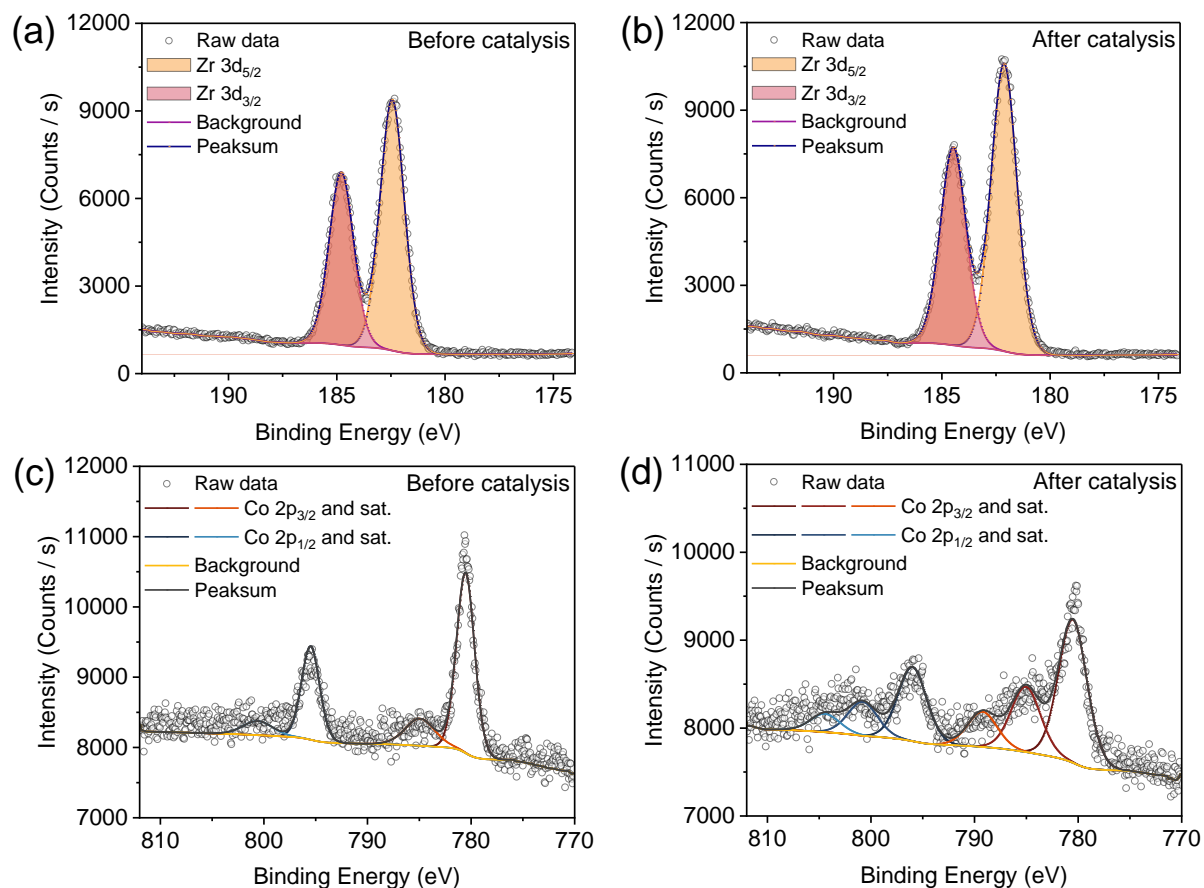

**Figure S5. High-resolution XPS spectra of (a-b) Zr 3d and (c-d) Co 2p in Zr-TCPCo before and after catalysis.**

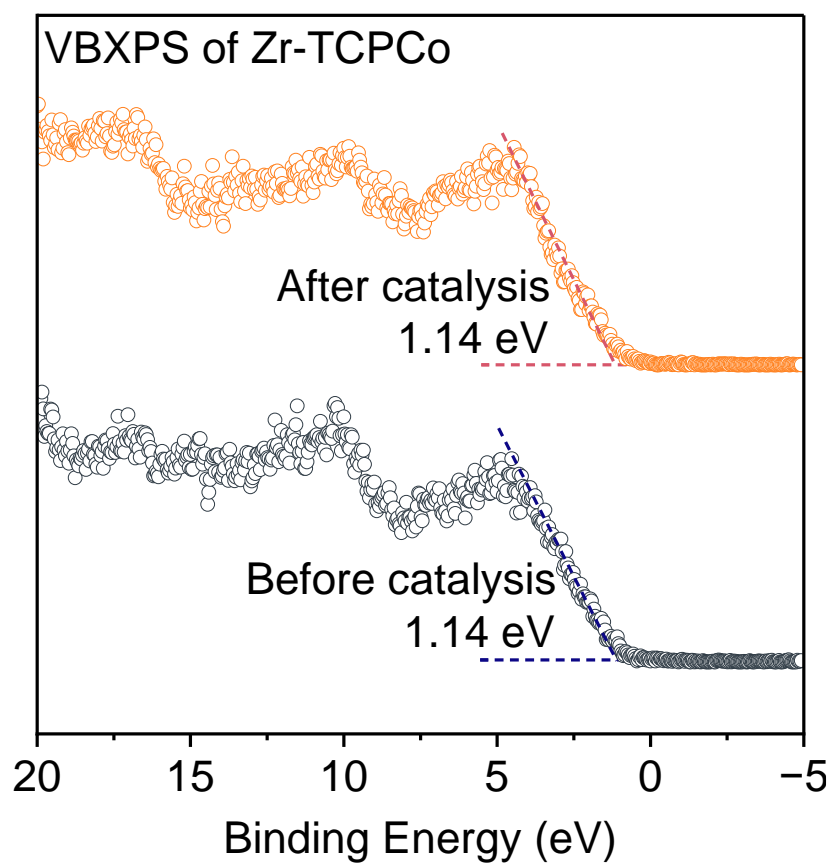

Figure S6. VBXPS spectra of Zr-TCPCo before and after catalysis.

## 8. Stability test

### 8.1 Thermostability

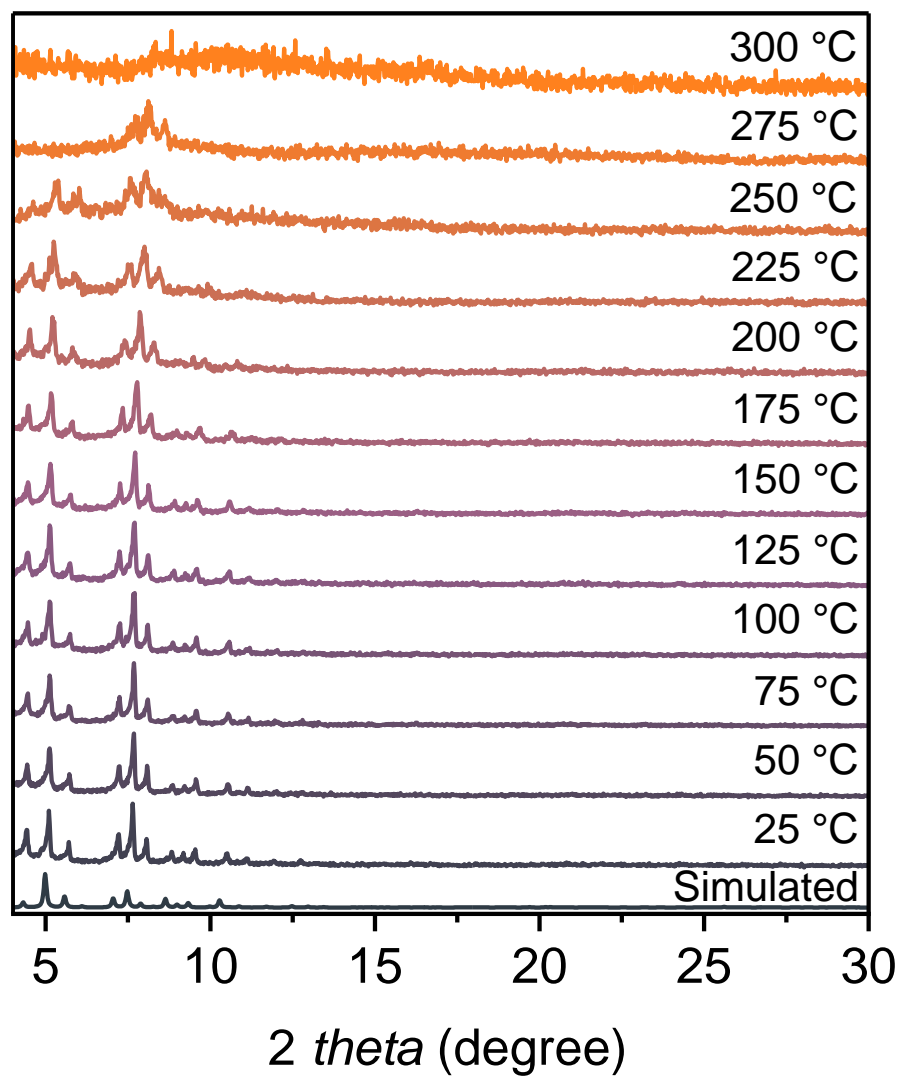

Figure S7. VT-PXRD patterns for Zr-TCPCo.

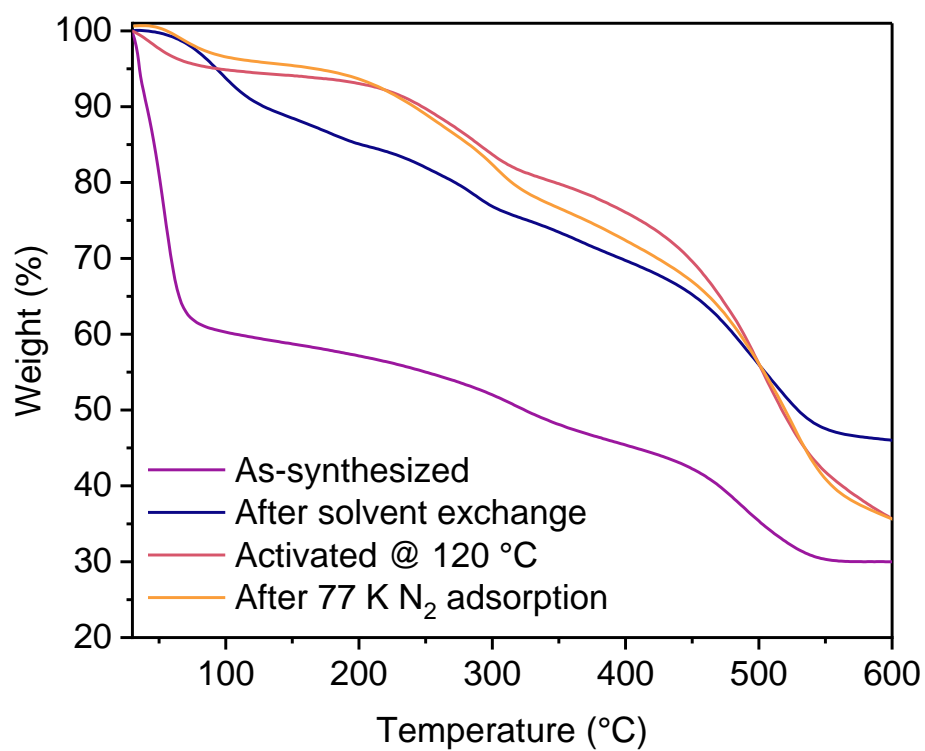

Figure S8. The thermogravimetry curves of Zr-TCPCo.

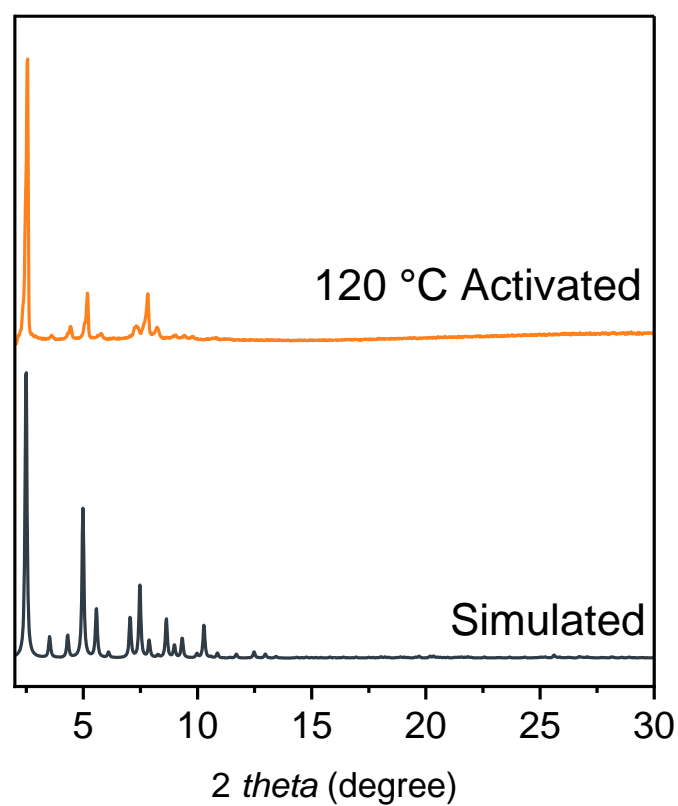

Figure S9. PXRD pattern of activated Zr-TCPCo before gas adsorption test.



## 8.2 Chemical stability

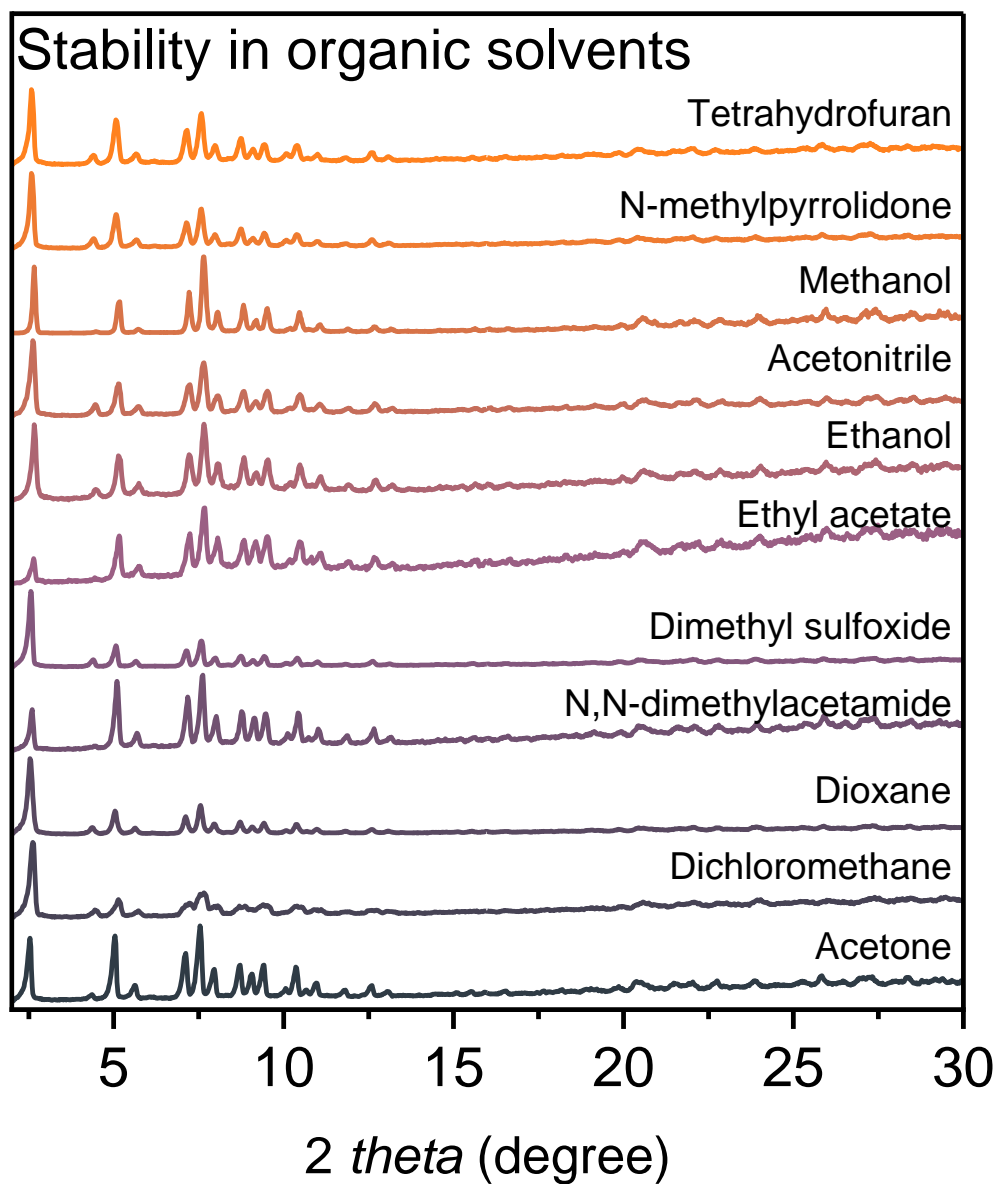

Figure S10. PXRD patterns of Zr-TCPCo after immersing in different organic solvents for 3 days.

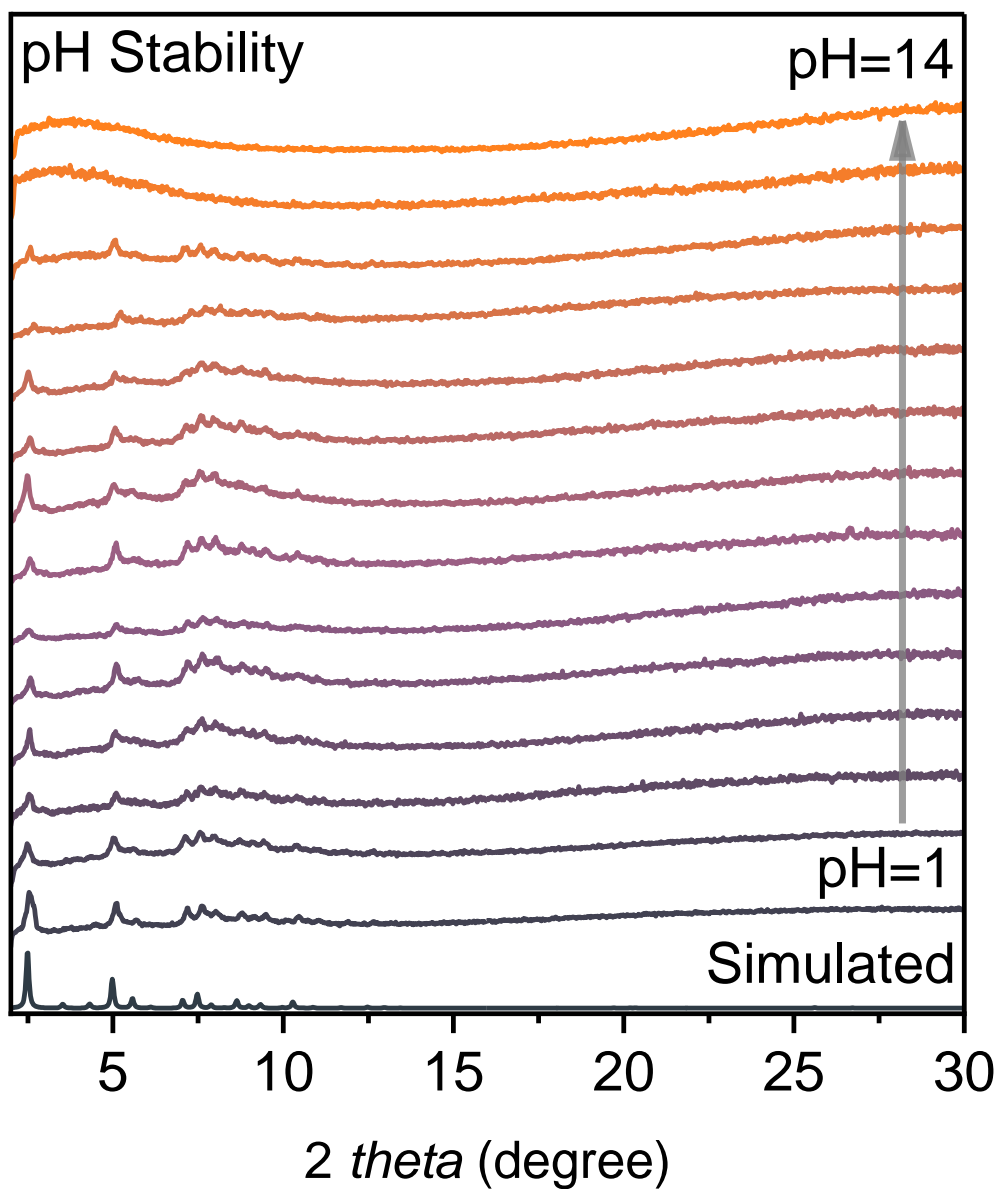

Figure S11. PXRD patterns of Zr-TCPCo after immersing in solutions with different pH values for 1 day.

### 8.3 Air and water stability

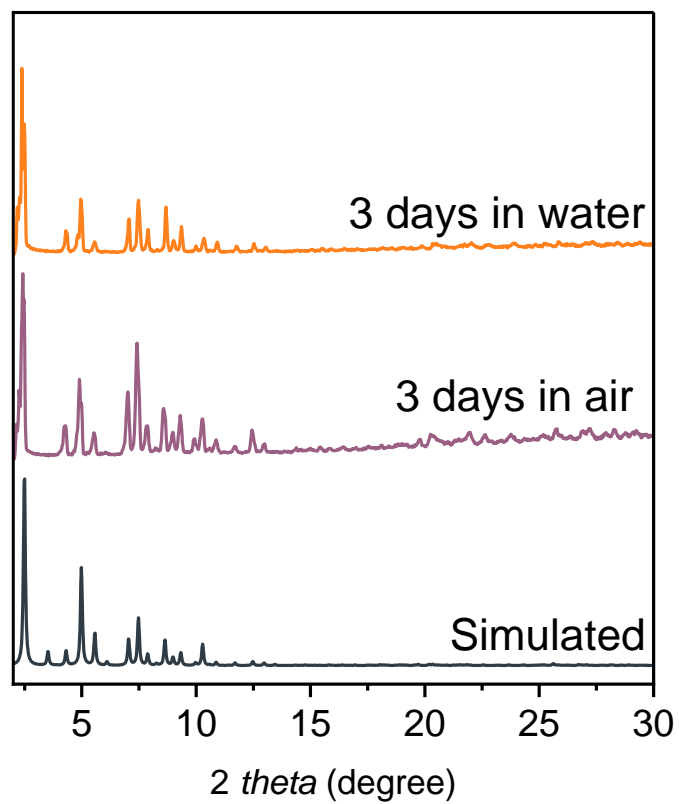

Figure S12. PXRD patterns of Zr-TCPCo after exposure to water and air for 1 day.

## 9. IR test of Zr-TCPCo

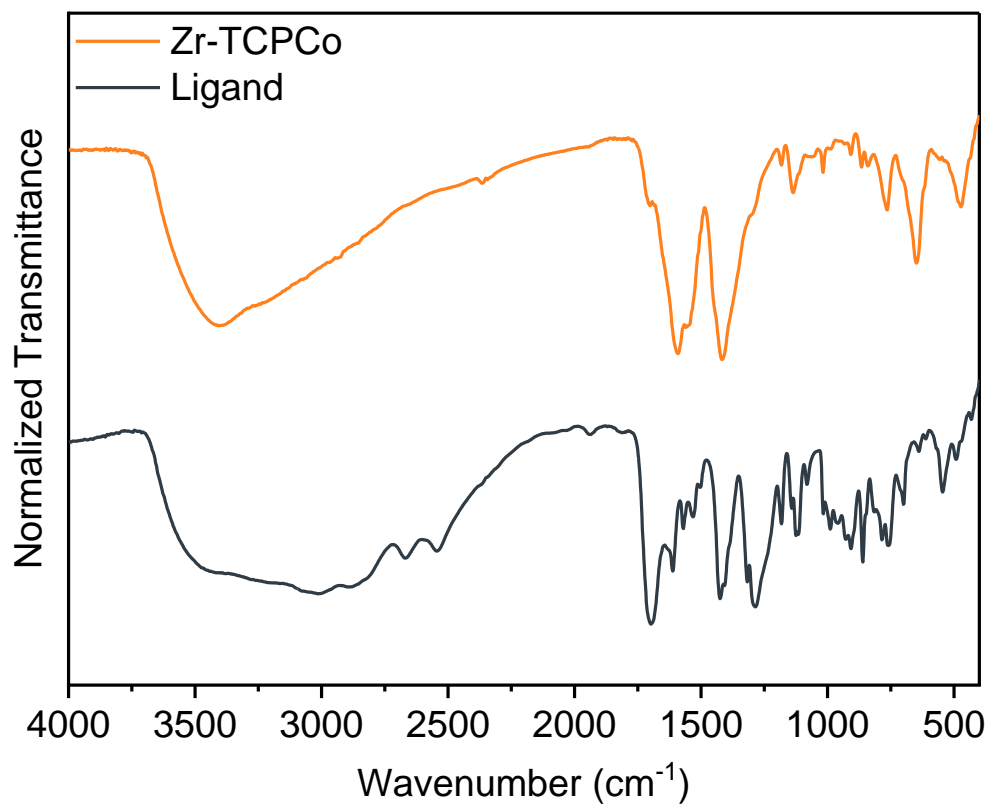

Figure S13. IR spectra of Zr-TCPCo and the cobaloxime ligand.

## 10. K-M function plot of Zr-TCPCo

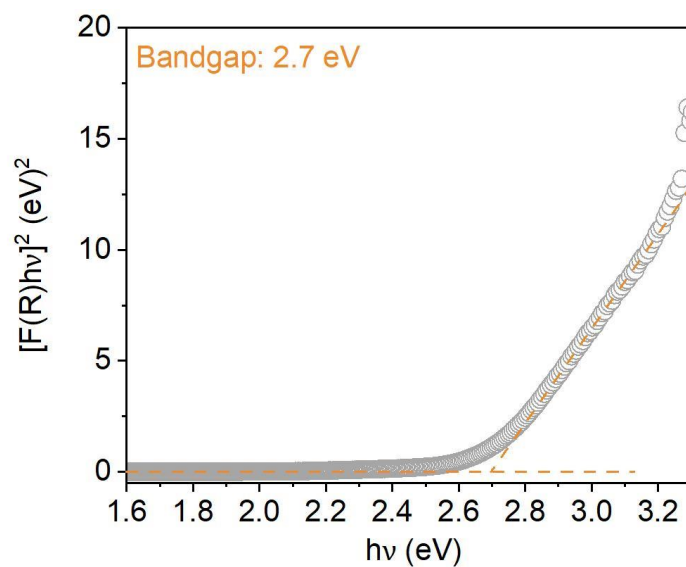

Figure S14. K-M function plot of Zr-TCPCo.

## 11. Mott-Schottky test

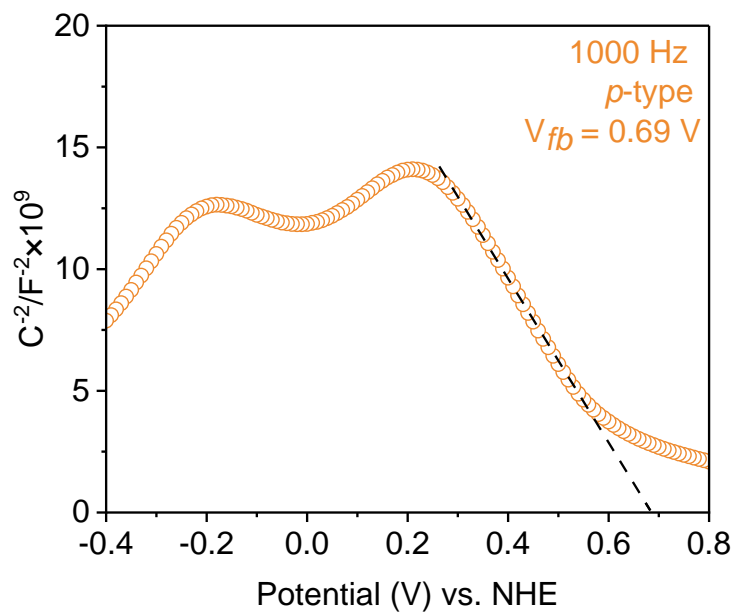

Figure S15. Mott-Schottky plot of Zr-TCPCo.

## 12. Cyclic voltammetry analysis

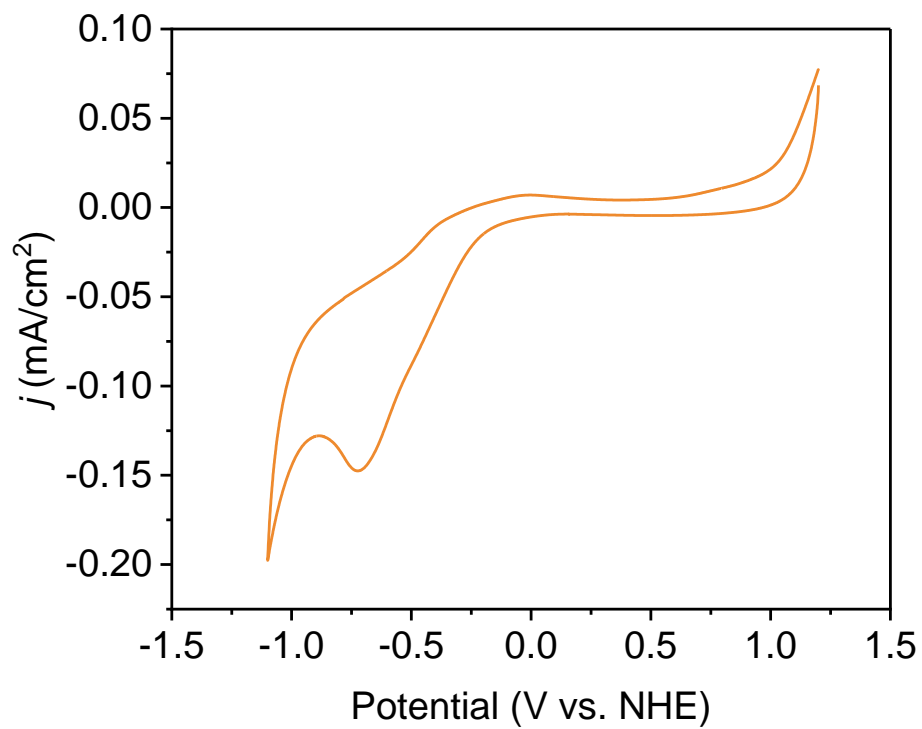

Figure S16. Cyclic voltammetry analysis of Zr-TCPCo.

### 13. General procedure for the photochemical reactions

**a** (0.2 mmol), Zr-TCPCo (3.0 mg), Et<sub>3</sub>N (55.5  $\mu$ L, 2.0 equiv.) were dissolved in 2.0 mL DCE in a 10.0 mL flask equipped with a magnetic stirring bar, then degassed with O<sub>2</sub> for 5 min. The reaction tube was irradiated by blue LEDs ( $\lambda = 450 \pm 10$  nm) at room temperature for 12 h. After the reaction, the Zr-TCPCo was separated by centrifugation and washed with a very small amount of DCE, then the solvent was removed by rotary evaporation and purified by column chromatography on silica gel using hexane/ethyl acetate as the eluent to afford the desired product **b**.

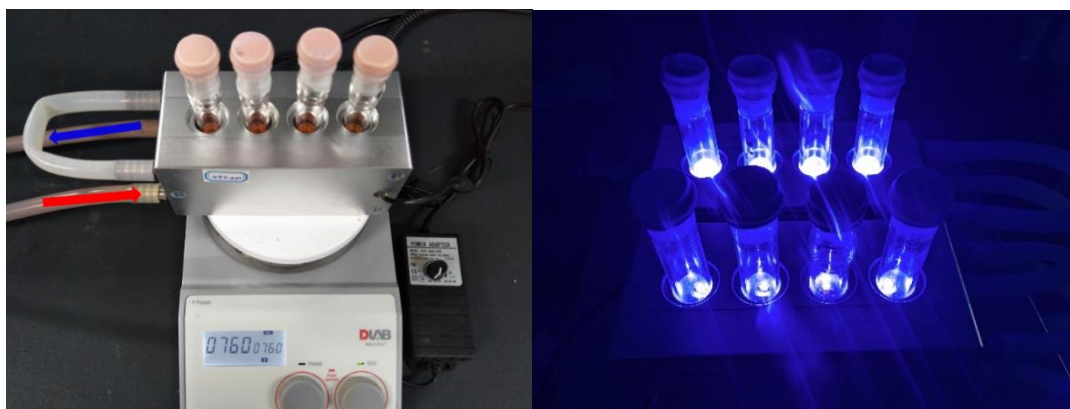

## 14. Characterization data of the products

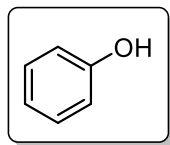

**b1**

Purification by column chromatography on silica gel (hexane/ethyl acetate = 10/1, v/v) afforded **b1** as off white solid (17.3 mg, 91% yield).

**<sup>1</sup>H NMR** (400 MHz, DMSO-*d*<sub>6</sub>) δ 9.34 (s, 1H), 7.16 (t, *J* = 7.9 Hz, 2H), 6.80 – 6.72 (m, 3H).

**<sup>13</sup>C NMR** (101 MHz, DMSO) δ 157.8, 129.8, 119.3, 115.7.

**HRMS** (ESI) calculated for C<sub>6</sub>H<sub>7</sub>O [M+H]<sup>+</sup> : 95.0491; Found: 95.0499

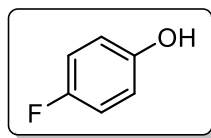

**b2**

Purification by column chromatography on silica gel (hexane/ethyl acetate = 10/1, v/v) afforded **b2** as off white solid (13.3 mg, 60% yield).

**<sup>1</sup>H NMR** (400 MHz, DMSO-*d*<sub>6</sub>) δ 9.36 (s, 1H), 6.97 (t, *J* = 8.9 Hz, 2H), 6.74 (dd, *J* = 9.0, 4.5 Hz, 2H).

**<sup>13</sup>C NMR** (101 MHz, DMSO-*d*<sub>6</sub>) δ 156.0 (d, *J* = 233.0 Hz), 154.1 (d, *J* = 1.9 Hz), 116.5 (d, *J* = 8.0 Hz), 116.0 (d, *J* = 22.7 Hz).

**<sup>19</sup>F NMR** (376 MHz, DMSO-*d*<sub>6</sub>) δ -128.94 (s, 1F).

**HRMS** (ESI) calculated for C<sub>6</sub>H<sub>6</sub>FO [M+H]<sup>+</sup> : 113.0397; Found: 113.0402

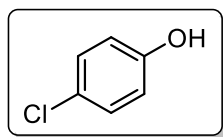

**b3**

Purification by column chromatography on silica gel (hexane/ethyl acetate = 10/1, v/v) afforded **b3** as pale-yellow solid (19.7 mg, 77% yield).

**<sup>1</sup>H NMR** (400 MHz, DMSO-*d*<sub>6</sub>) δ 9.67 (s, 1H), 7.19 (d, *J* = 8.8 Hz, 2H), 6.77 (d, *J* = 8.8 Hz, 2H).



**$^{13}\text{C}$  NMR** (101 MHz, DMSO)  $\delta$  156.8, 129.6, 122.8, 117.4.

**HRMS** (ESI) calculated for  $\text{C}_6\text{H}_6\text{ClO}$   $[\text{M}+\text{H}]^+$  : 129.0102; Found: 129.0099

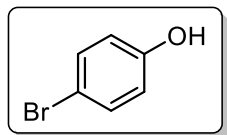

**b4**

Purification by column chromatography on silica gel (hexane/ethyl acetate = 10/1, v/v) afforded **O4** as pale-yellow solid (25.5 mg, 74% yield).

**$^1\text{H}$  NMR** (400 MHz,  $\text{DMSO}-d_6$ )  $\delta$  9.70 (s, 1H), 7.32 (d,  $J$  = 8.8 Hz, 2H), 6.74 (d,  $J$  = 8.8 Hz, 2H).

**$^{13}\text{C}$  NMR** (101 MHz, DMSO)  $\delta$  157.3, 132.5, 118.1, 110.4.

**HRMS** (ESI) calculated for  $\text{C}_6\text{H}_6\text{BrO}$   $[\text{M}+\text{H}]^+$  : 172.9597; Found: 172.9595

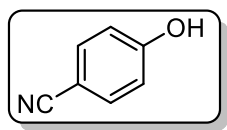

**b5**

Purification by column chromatography on silica gel (hexane/ethyl acetate = 2/1, v/v) afforded **O5** as pale-yellow solid (12.6 mg, 53% yield).

**$^1\text{H}$  NMR** (400 MHz,  $\text{DMSO}-d_6$ )  $\delta$  10.33 (s, 1H), 7.81 (d,  $J$  = 8.7 Hz, 2H), 6.83 (d,  $J$  = 8.6 Hz, 2H).

**$^{13}\text{C}$  NMR** (101 MHz, DMSO)  $\delta$  196.5, 162.4, 131.2, 129.1, 115.6.

**HRMS** (ESI) calculated for  $\text{C}_7\text{H}_6\text{NO}$   $[\text{M}+\text{H}]^+$  : 120.0444; Found: 120.0438

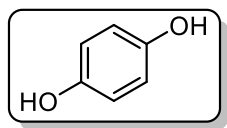

**b6**

Purification by column chromatography on silica gel (hexane/ethyl acetate = 3/1, v/v) afforded **b6** as off white solid (18.9 mg, 86% yield).

**$^1\text{H}$  NMR** (400 MHz,  $\text{DMSO}-d_6$ )  $\delta$  8.61 (s, 2H), 6.54 (s, 4H).

**$^{13}\text{C}$  NMR** (101 MHz,  $\text{DMSO}-d_6$ )  $\delta$  150.2, 116.1.

**HRMS** (ESI) calculated for  $\text{C}_6\text{H}_7\text{O}_2$   $[\text{M}+\text{H}]^+$  : 111.0441; Found: 111.0447

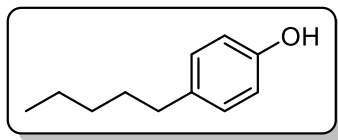

**b7**

Purification by column chromatography on silica gel (hexane/ethyl acetate = 10/1, v/v) afforded **b7** as off white solid (24.6 mg, 75% yield).

**<sup>1</sup>H NMR** (400 MHz, DMSO-*d*<sub>6</sub>) δ 9.09 (s, 1H), 6.97 (d, *J* = 8.4 Hz, 2H), 6.67 (d, *J* = 8.4 Hz, 2H), 2.45 (t, *J* = 7.6 Hz, 2H), 1.52 (p, *J* = 7.4 Hz, 2H), 1.38 – 1.17 (m, 4H), 0.87 (t, *J* = 7.0 Hz, 3H).

**<sup>13</sup>C NMR** (101 MHz, DMSO) δ 155.7, 132.8, 129.5, 115.5, 34.8, 31.5, 31.4, 22.5, 14.4.

**HRMS** (ESI) calculated for C<sub>11</sub>H<sub>17</sub>O [M+H]<sup>+</sup>: 165.1274; Found: 165.1277

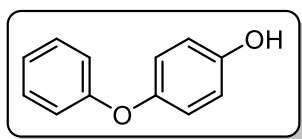

**b8**

Purification by column chromatography on silica gel (hexane/ethyl acetate = 10/1, v/v) afforded **b8** as white solid (32.9 mg, 88% yield).

**<sup>1</sup>H NMR** (400 MHz, DMSO-*d*<sub>6</sub>) δ 9.35 (s, 1H), 7.33 (dd, *J* = 8.6, 7.3 Hz, 2H), 7.05 (t, *J* = 7.4 Hz, 1H), 6.90 (d, *J* = 8.9 Hz, 4H), 6.80 (d, *J* = 8.9 Hz, 2H).

**<sup>13</sup>C NMR** (101 MHz, DMSO) δ 158.9, 154.4, 148.3, 130.3, 122.7, 121.4, 117.4, 116.8.

**HRMS** (ESI) calculated for C<sub>12</sub>H<sub>11</sub>O<sub>2</sub> [M+H]<sup>+</sup>: 187.0754; Found: 187.0759

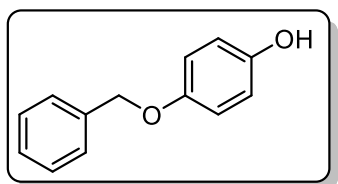

**b9**

Purification by column chromatography on silica gel (hexane/ethyl acetate = 10/1, v/v) afforded **b9** as white solid (28.0 mg, 70% yield).

**<sup>1</sup>H NMR** (400 MHz, DMSO-*d*<sub>6</sub>) δ 8.94 (s, 1H), 7.41 (dt, *J* = 14.7, 7.2 Hz, 4H), 7.34 (d, *J* = 7.1 Hz, 1H), 6.84 (d, *J* = 8.9 Hz, 2H), 6.70 (d, *J* = 8.9 Hz, 2H), 5.00 (s, 2H).

**<sup>13</sup>C NMR** (101 MHz, DMSO)  $\delta$  151.9, 151.7, 138.1, 128.8, 128.2, 128.1, 116.3, 116.2, 70.2.

**HRMS** (ESI) calculated for C<sub>13</sub>H<sub>13</sub>O<sub>2</sub> [M+H]<sup>+</sup>: 201.0910; Found: 201.0905

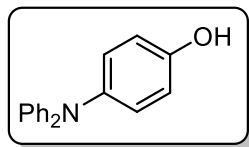

**b10**

Purification by column chromatography on silica gel (hexane/ethyl acetate = 10/1, v/v) afforded **b10** as pale-green solid (40.2 mg, 77% yield).

**<sup>1</sup>H NMR** (400 MHz, DMSO-*d*<sub>6</sub>)  $\delta$  9.42 (s, 1H), 7.23 (t, *J* = 7.9 Hz, 4H), 6.93 (dd, *J* = 8.7, 6.5 Hz, 8H), 6.78 (d, *J* = 8.7 Hz, 2H).

**<sup>13</sup>C NMR** (101 MHz, DMSO)  $\delta$  155.1, 148.3, 138.7, 129.7, 128.4, 122.4, 122.0, 116.9.

**HRMS** (ESI) calculated for C<sub>18</sub>H<sub>16</sub>NO [M+H]<sup>+</sup>: 262.1226; Found: 262.1222

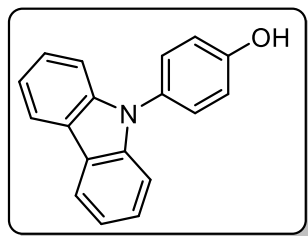

**b11**

Purification by column chromatography on silica gel (hexane/ethyl acetate = 10/1, v/v) afforded **b11** as off white solid (49.2 mg, 95% yield).

**<sup>1</sup>H NMR** (400 MHz, DMSO-*d*<sub>6</sub>)  $\delta$  9.88 (s, 1H), 8.23 (d, *J* = 7.9 Hz, 2H), 7.46 – 7.33 (m, 4H), 7.28 (dd, *J* = 12.8, 7.7 Hz, 4H), 7.06 (d, *J* = 8.7 Hz, 2H).

**<sup>13</sup>C NMR** (101 MHz, DMSO)  $\delta$  157.5, 141.3, 128.7, 128.3, 126.6, 122.9, 120.9, 120.1, 117.1, 110.1.

**HRMS** (ESI) calculated for C<sub>18</sub>H<sub>14</sub>NO [M+H]<sup>+</sup>: 260.1070; Found: 260.1074

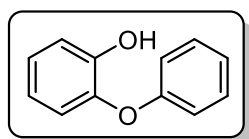

**b12**

Purification by column chromatography on silica gel (hexane/ethyl acetate = 10/1, v/v) afforded **b12** as white solid (33.3 mg, 74% yield).

**<sup>1</sup>H NMR** (400 MHz, DMSO-*d*<sub>6</sub>) δ 9.51 (s, 1H), 7.28 (t, *J* = 7.7 Hz, 2H), 6.99 (dq, *J* = 22.3, 7.6, 7.1 Hz, 4H), 6.80 (dd, *J* = 13.5, 7.4 Hz, 3H).

**<sup>13</sup>C NMR** (101 MHz, DMSO) δ 158.4, 149.9, 142.9, 130.0, 125.9, 122.4, 122.3, 120.1, 117.8, 116.5.

**HRMS** (ESI) calculated for C<sub>12</sub>H<sub>11</sub>O<sub>2</sub> [M+H]<sup>+</sup> : 187.0754; Found: 187.0760

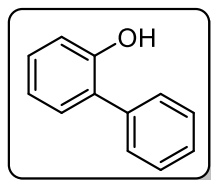

**b13**

Purification by column chromatography on silica gel (hexane/ethyl acetate = 10/1, v/v) afforded **b13** as white solid (27.5 mg, 81% yield).

**<sup>1</sup>H NMR** (400 MHz, DMSO-*d*<sub>6</sub>) δ 9.50 (s, 1H), 7.51 (d, *J* = 7.6 Hz, 2H), 7.36 (t, *J* = 7.5 Hz, 2H), 7.30 – 7.18 (m, 2H), 7.13 (dd, *J* = 8.4, 6.8 Hz, 1H), 6.93 (d, *J* = 8.0 Hz, 1H), 6.85 (t, *J* = 7.4 Hz, 1H).

**<sup>13</sup>C NMR** (101 MHz, DMSO) δ 154.7, 139.1, 130.8, 129.5, 128.9, 128.3, 128.2, 126.9, 119.9, 116.5.

**HRMS** (ESI) calculated for C<sub>12</sub>H<sub>11</sub>O [M+H]<sup>+</sup> : 171.0804; Found: 171.0809

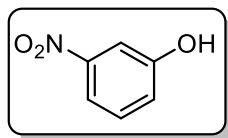

**b14**

Purification by column chromatography on silica gel (hexane/ethyl acetate = 10/1, v/v) afforded **b14** as light brown solid (13.0 mg, 47% yield).

**<sup>1</sup>H NMR** (400 MHz, DMSO-*d*<sub>6</sub>) δ 10.45 (s, 1H), 7.67 (ddd, *J* = 8.1, 2.2, 0.9 Hz, 1H), 7.57 (t, *J* = 2.3 Hz, 1H), 7.48 (t, *J* = 8.2 Hz, 1H), 7.23 (ddd, *J* = 8.2, 2.4, 0.9 Hz, 1H).

**<sup>13</sup>C NMR** (101 MHz, DMSO) δ 158.8, 149.2, 131.1, 122.9, 114.3, 110.1.

**HRMS** (ESI) calculated for C<sub>6</sub>H<sub>6</sub>NO<sub>3</sub> [M+H]<sup>+</sup> : 140.0342; Found: 140.0344

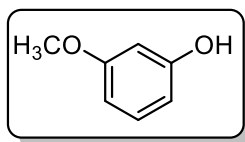

**b15**

Purification by column chromatography on silica gel (hexane/ethyl acetate = 10/1, v/v) afforded **b15** as off white solid (17.8 mg, 78% yield).

**<sup>1</sup>H NMR** (400 MHz, DMSO-*d*<sub>6</sub>) δ 10.33 (s, 1H), 7.83 (d, *J* = 8.8 Hz, 2H), 6.86 (d, *J* = 8.7 Hz, 2H), 3.80 (s, 3H).

**<sup>13</sup>C NMR** (101 MHz, DMSO) δ 166.6, 162.5, 131.9, 120.8, 115.8, 52.1.

**HRMS** (ESI) calculated for C<sub>7</sub>H<sub>9</sub>O<sub>2</sub> [M+H]<sup>+</sup>: 125.0597; Found: 125.0562

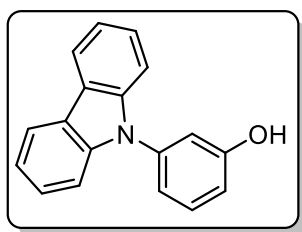

**b16**

Purification by column chromatography on silica gel (hexane/ethyl acetate = 10/1, v/v) afforded **b16** as off white solid (50.2 mg, 97% yield).

**<sup>1</sup>H NMR** (400 MHz, DMSO-*d*<sub>6</sub>) δ 9.95 (s, 1H), 8.24 (d, *J* = 7.8 Hz, 2H), 7.49 (t, *J* = 8.1 Hz, 1H), 7.47 – 7.42 (m, 4H), 7.29 (ddd, *J* = 8.2, 5.1, 3.3 Hz, 2H), 7.07 – 6.95 (m, 3H).

**<sup>13</sup>C NMR** (101 MHz, DMSO) δ 159.3, 140.6, 138.4, 131.4, 126.7, 123.2, 121.0, 120.5, 117.5, 115.3, 113.8, 110.3.

**HRMS** (ESI) calculated for C<sub>18</sub>H<sub>14</sub>NO [M+H]<sup>+</sup>: 260.1070; Found: 260.1066

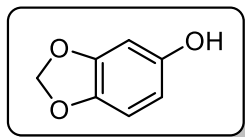

**b17**

Purification by column chromatography on silica gel (hexane/ethyl acetate = 10/1, v/v) afforded **b17** as colorless oil (17.9 mg, 65% yield).

**<sup>1</sup>H NMR** (400 MHz, DMSO-*d*<sub>6</sub>) δ 9.10 (s, 1H), 6.70 (d, *J* = 8.3 Hz, 1H), 6.39 (d, *J* = 2.4 Hz, 1H), 6.21 (dd, *J* = 8.3, 2.4 Hz, 1H), 5.90 (s, 2H).

**<sup>13</sup>C NMR** (101 MHz, DMSO) δ 153.0, 148.2, 140.2, 108.7, 106.8, 101.1, 98.4.

**HRMS** (ESI) calculated for C<sub>7</sub>H<sub>7</sub>O<sub>3</sub> [M+H]<sup>+</sup> : 139.0390; Found: 139.0398

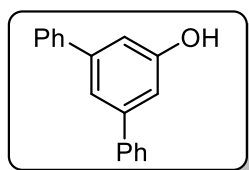

**b18**

Purification by column chromatography on silica gel (hexane/ethyl acetate = 10/1, v/v) afforded **b18** as white solid (40.8 mg, 83% yield).

**<sup>1</sup>H NMR** (400 MHz, DMSO-*d*<sub>6</sub>) δ 9.76 (s, 1H), 7.71 (d, *J* = 7.0 Hz, 4H), 7.49 (t, *J* = 7.6 Hz, 4H), 7.38 (dd, *J* = 15.1, 7.8 Hz, 3H), 7.08 (d, *J* = 1.6 Hz, 2H).

**<sup>13</sup>C NMR** (101 MHz, DMSO) δ 158.8, 142.8, 140.9, 129.4, 128.1, 127.3, 116.8, 113.3.

**HRMS** (ESI) calculated for C<sub>18</sub>H<sub>15</sub>O [M+H]<sup>+</sup> : 247.1117; Found: 247.1110

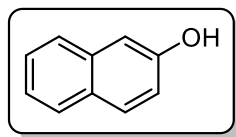

**b19**

Purification by column chromatography on silica gel (hexane/ethyl acetate = 10/1, v/v) afforded **b19** as white solid (21.8 mg, 75% yield).

**<sup>1</sup>H NMR** (400 MHz, DMSO-*d*<sub>6</sub>) δ 9.73 (s, 1H), 7.75 (dd, *J* = 8.4, 4.4 Hz, 2H), 7.67 (d, *J* = 8.2 Hz, 1H), 7.38 (ddd, *J* = 8.2, 6.8, 1.3 Hz, 1H), 7.25 (ddd, *J* = 8.1, 6.8, 1.2 Hz, 1H), 7.12 (d, *J* = 2.4 Hz, 1H), 7.09 (dd, *J* = 8.7, 2.5 Hz, 1H).

**<sup>13</sup>C NMR** (101 MHz, DMSO) δ 155.8, 135.2, 129.8, 128.2, 128.0, 126.6, 126.4, 123.1, 119.1, 109.1.

**HRMS** (ESI) calculated for C<sub>10</sub>H<sub>9</sub>O [M+H]<sup>+</sup> : 145.0648; Found: 145.0656

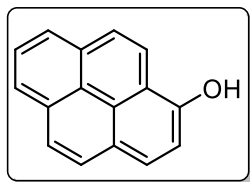

**b20**

Purification by column chromatography on silica gel (hexane/ethyl acetate = 7/1, v/v) afforded **b20** as white solid (25.8 mg, 59% yield).

**<sup>1</sup>H NMR** (400 MHz, DMSO-*d*<sub>6</sub>) δ 10.65 (s, 1H), 8.36 (d, *J* = 9.1 Hz, 1H), 8.14 (dd, *J* = 7.7, 5.7 Hz, 3H), 8.07 – 7.97 (m, 3H), 7.91 (d, *J* = 8.9 Hz, 1H), 7.62 (d, *J* = 8.3 Hz, 1H).

**<sup>13</sup>C NMR** (101 MHz, DMSO) δ 152.7, 131.9, 131.8, 127.9, 126.7, 126.6, 126.00, 125.96, 124.5, 124.4, 124.3, 124.1, 124.1, 121.9, 118.6, 113.8.

**HRMS** (ESI) calculated for C<sub>16</sub>H<sub>11</sub>O [M+H]<sup>+</sup> : 219.0804; Found: 219.0808

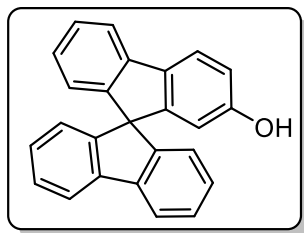

**b21**

Purification by column chromatography on silica gel (hexane/ethyl acetate = 10/1, v/v) afforded **b21** as off white solid (51.8 mg, 78% yield).

**<sup>1</sup>H NMR** (400 MHz, DMSO-*d*<sub>6</sub>) δ 9.38 (s, 1H), 8.02 (d, *J* = 7.6 Hz, 2H), 7.84 (dd, *J* = 15.0, 7.9 Hz, 2H), 7.41 (td, *J* = 7.5, 1.1 Hz, 2H), 7.34 (td, *J* = 7.5, 1.1 Hz, 1H), 7.15 (td, *J* = 7.5, 1.1 Hz, 2H), 7.02 (td, *J* = 7.5, 1.1 Hz, 1H), 6.83 (dd, *J* = 8.3, 2.3 Hz, 1H), 6.66 (dd, *J* = 7.6, 0.9 Hz, 2H), 6.57 (d, *J* = 7.5 Hz, 1H), 6.02 (d, *J* = 2.2 Hz, 1H).

**<sup>13</sup>C NMR** (101 MHz, DMSO) δ 158.2, 150.6, 149.2, 147.9, 142.3, 141.6, 132.9, 128.5, 128.4, 128.3, 126.8, 124.1, 123.8, 122.0, 121.0, 119.8, 115.7, 110.6, 65.8.

**HRMS** (ESI) calculated for C<sub>25</sub>H<sub>17</sub>O [M+H]<sup>+</sup> : 333.1274; Found: 333.1271

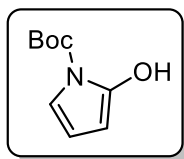

**b22**

Purification by column chromatography on silica gel (hexane/ethyl acetate = 5/1, v/v) afforded **b22** as colorless oil (32.9 mg, 90% yield).

**<sup>1</sup>H NMR** (400 MHz, DMSO-*d*<sub>6</sub>) δ 8.02 (s, 1H), 7.29 (dd, *J* = 3.1, 1.5 Hz, 1H), 6.38 (dt, *J* = 3.2, 1.7 Hz, 1H), 6.18 (t, *J* = 3.1 Hz, 1H), 1.50 (s, 9H).

**<sup>13</sup>C NMR** (101 MHz, DMSO) δ 150.2, 123.3, 120.8, 112.1, 84.4, 27.8.

**HRMS** (ESI) calculated for C<sub>9</sub>H<sub>14</sub>NO<sub>3</sub> [M+H]<sup>+</sup>: 184.0968; Found: 184.0973

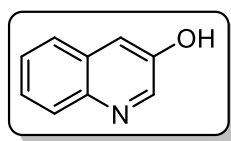

**b23**

Purification by column chromatography on silica gel (hexane/ethyl acetate = 3/1, v/v) afforded **b23** as off white solid (33.3 mg, 73% yield).

**<sup>1</sup>H NMR** (400 MHz, DMSO-*d*<sub>6</sub>) δ 10.30 (s, 1H), 8.56 (d, *J* = 2.7 Hz, 1H), 7.88 (d, *J* = 9.1 Hz, 1H), 7.77 (d, *J* = 9.4 Hz, 1H), 7.48 (dd, *J* = 6.5, 3.2 Hz, 3H).

**<sup>13</sup>C NMR** (101 MHz, DMSO) δ 151.3, 144.4, 142.9, 129.5, 129.1, 127.2, 127.0, 126.3, 115.7.

**HRMS** (ESI) calculated for C<sub>9</sub>H<sub>8</sub>NO [M+H]<sup>+</sup>: 146.0600; Found: 146.0598

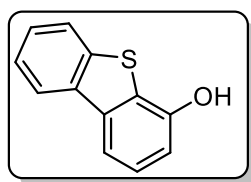

**b24**

Purification by column chromatography on silica gel (hexane/ethyl acetate = 10/1, v/v) afforded **b24** as off white solid (24.4 mg, 61% yield).

**<sup>1</sup>H NMR** (400 MHz, DMSO-*d*<sub>6</sub>) δ 10.48 (s, 1H), 8.33 – 8.24 (m, 1H), 8.05 – 7.99 (m, 1H), 7.82 (dd, *J* = 7.8, 0.9 Hz, 1H), 7.56 – 7.43 (m, 2H), 7.36 (t, *J* = 7.8 Hz, 1H), 6.98 (d, *J* = 7.7 Hz, 1H).

**<sup>13</sup>C NMR** (101 MHz, DMSO) δ 152.8, 139.2, 137.4, 136.2, 127.4, 126.7, 126.2, 125.1, 125.0, 123.6, 122.7, 113.4, 112.0.

**HRMS** (ESI) calculated for C<sub>12</sub>H<sub>9</sub>OS [M+H]<sup>+</sup>: 201.0369; Found: 201.0373



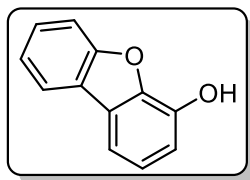

**b25**

Purification by column chromatography on silica gel (hexane/ethyl acetate = 10/1, v/v) afforded **b25** as off white solid (25.8 mg, 70% yield).

**<sup>1</sup>H NMR** (400 MHz, DMSO-*d*<sub>6</sub>) δ 10.23 (s, 1H), 8.09 (d, *J* = 7.6 Hz, 1H), 7.71 (d, *J* = 8.2 Hz, 1H), 7.59 – 7.47 (m, 2H), 7.38 (td, *J* = 7.5, 1.0 Hz, 1H), 7.21 (t, *J* = 7.8 Hz, 1H), 7.01 (dd, *J* = 7.9, 1.1 Hz, 1H).

**<sup>13</sup>C NMR** (101 MHz, DMSO) δ 155.8, 144.6, 143.5, 127.8, 125.7, 124.6, 124.3, 123.4, 121.6, 114.5, 112.2, 111.8.

**HRMS** (ESI) calculated for C<sub>12</sub>H<sub>9</sub>O<sub>2</sub> [M+H]<sup>+</sup> : 185.0597; Found: 185.0591

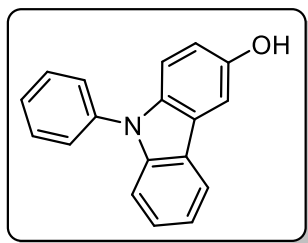

**b26**

Purification by column chromatography on silica gel (hexane/ethyl acetate = 5/1, v/v) afforded **b26** as light-yellow solid (30.6 mg, 59% yield).

**<sup>1</sup>H NMR** (400 MHz, DMSO-*d*<sub>6</sub>) δ 9.20 (s, 1H), 8.11 (d, *J* = 7.8 Hz, 1H), 7.63 (t, *J* = 7.6 Hz, 2H), 7.56 (d, *J* = 8.3 Hz, 3H), 7.46 (t, *J* = 7.0 Hz, 1H), 7.39 – 7.29 (m, 2H), 7.20 (t, *J* = 7.1 Hz, 2H), 6.93 (d, *J* = 8.8, 1H).

**<sup>13</sup>C NMR** (101 MHz, DMSO) δ 152.1, 140.9, 137.8, 134.6, 130.5, 127.6, 126.8, 126.5, 124.0, 123.1, 120.9, 119.8, 115.9, 110.6, 109.9, 105.7.

**HRMS** (ESI) calculated for C<sub>18</sub>H<sub>14</sub>NO [M+H]<sup>+</sup> : 260.1070; Found: 260.1068

## 15. NMR spectra for the products

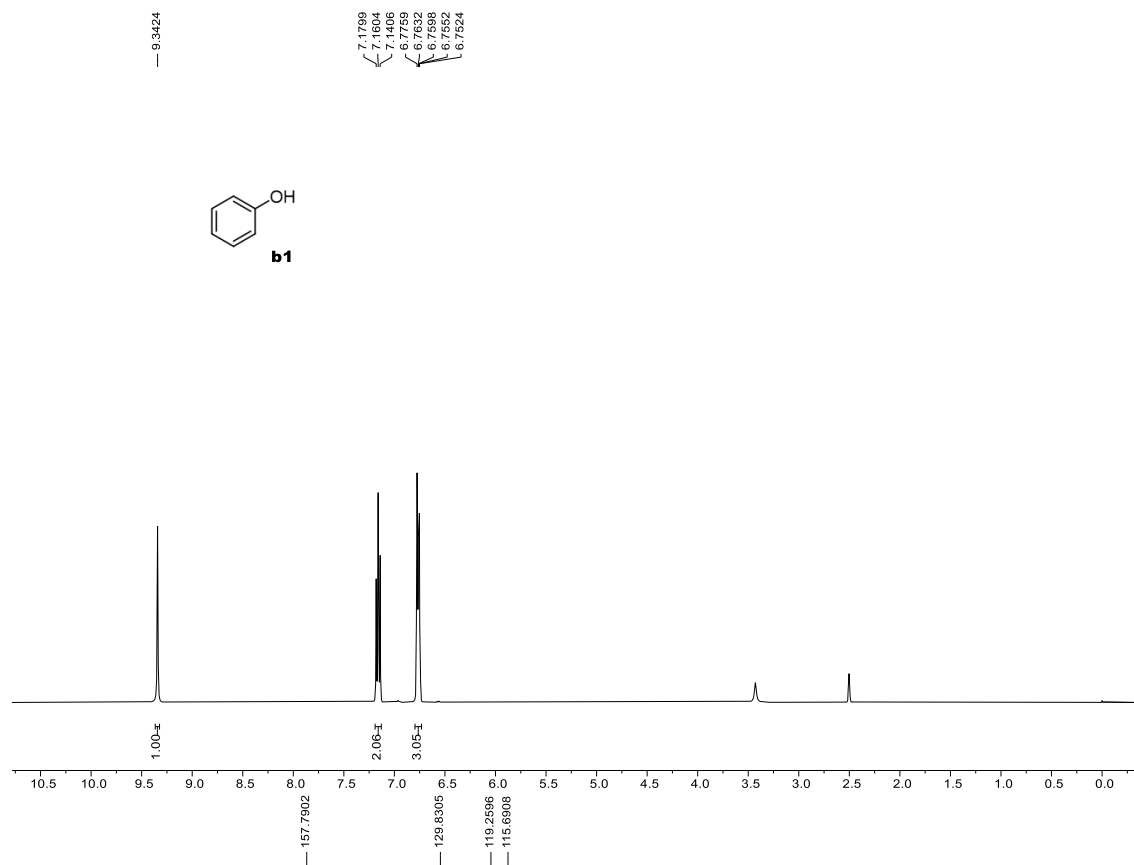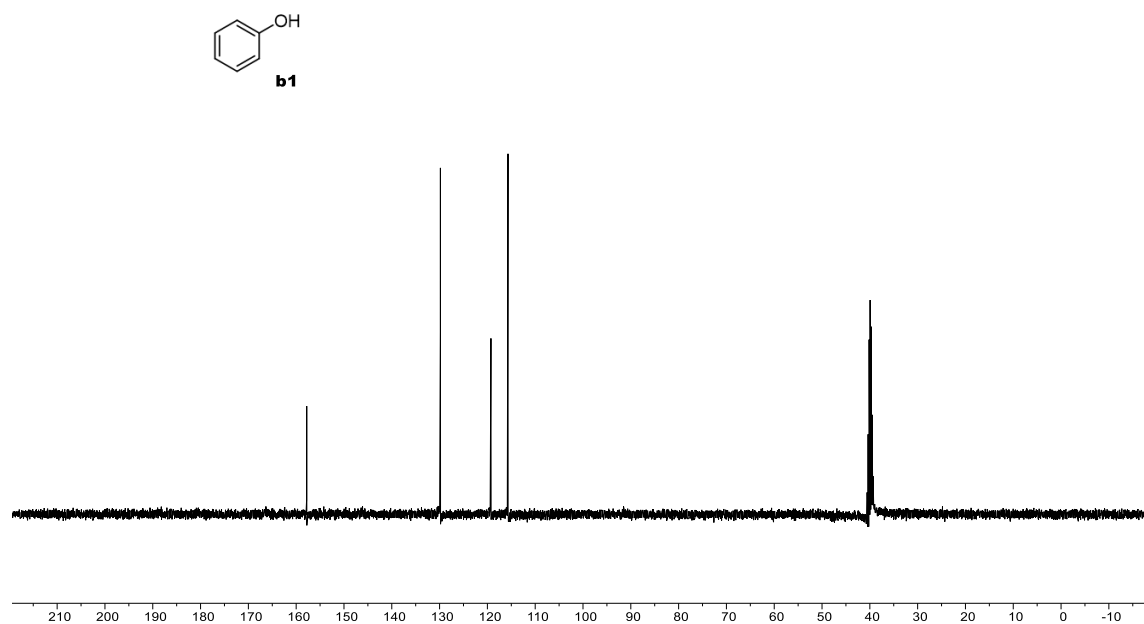

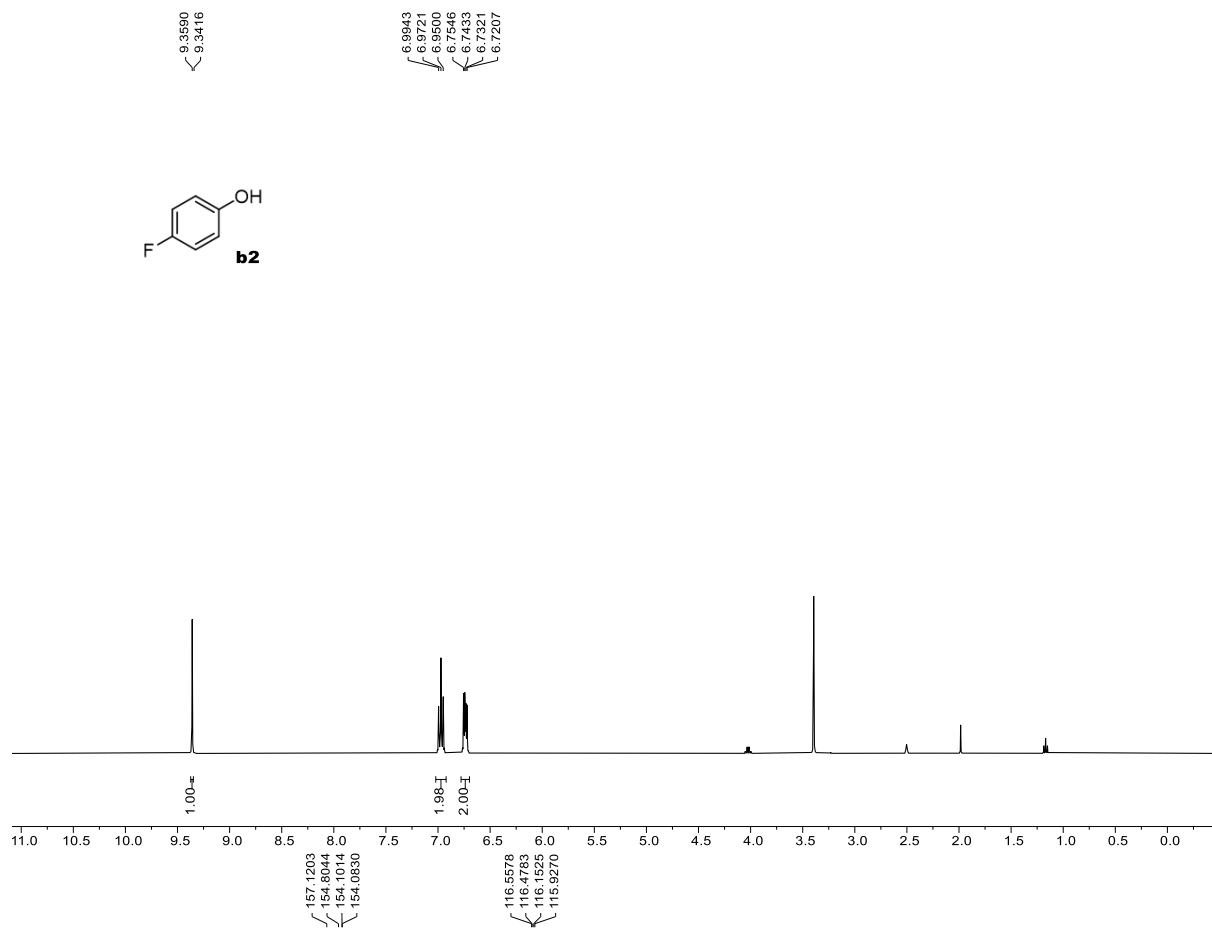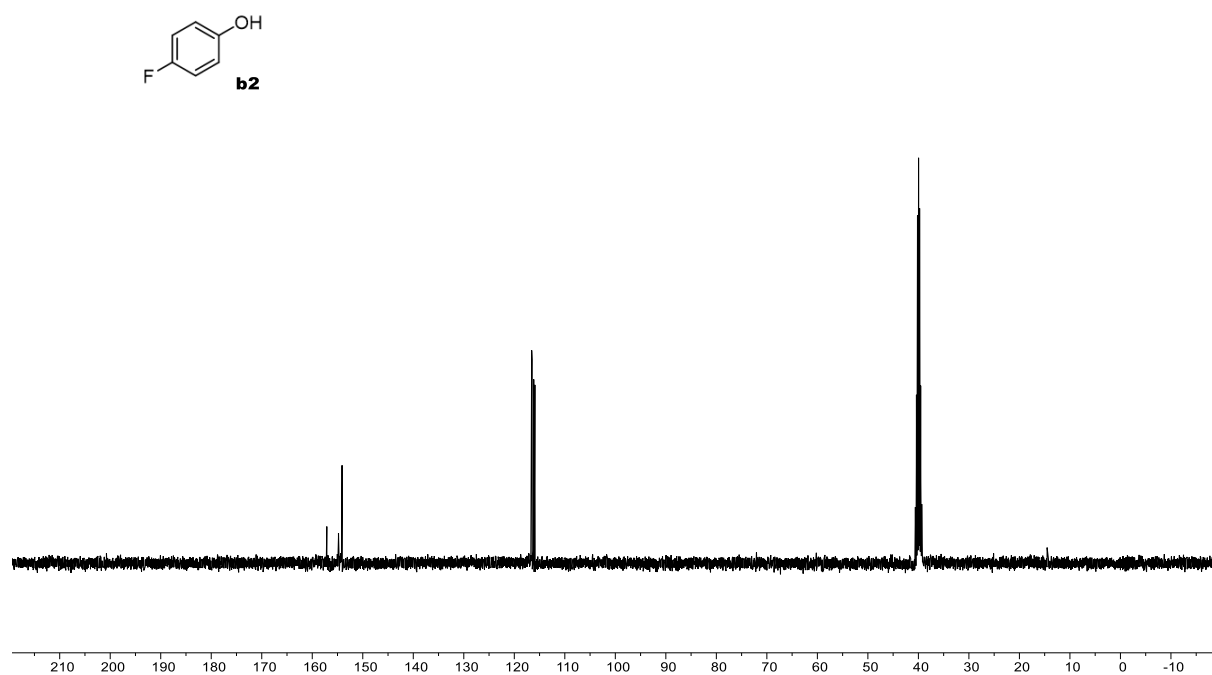

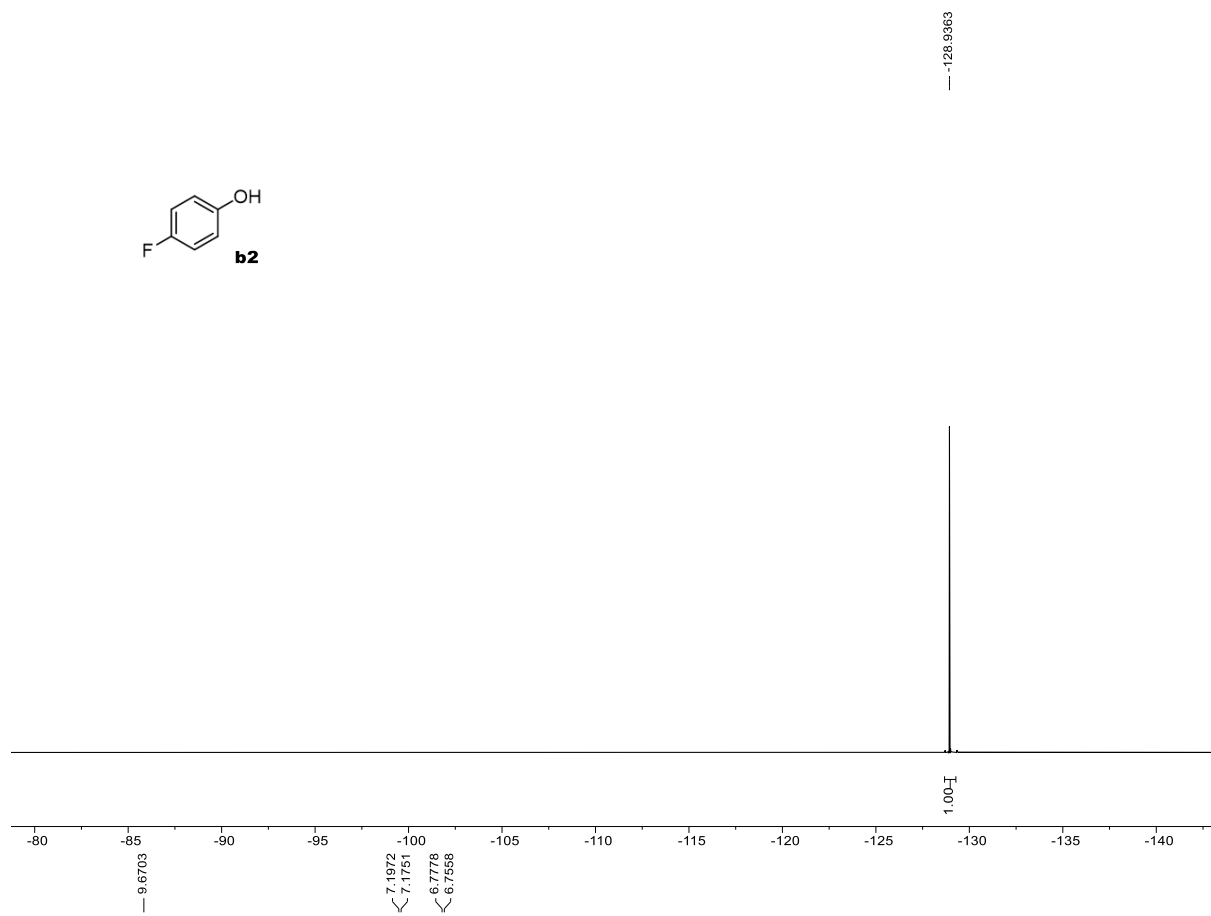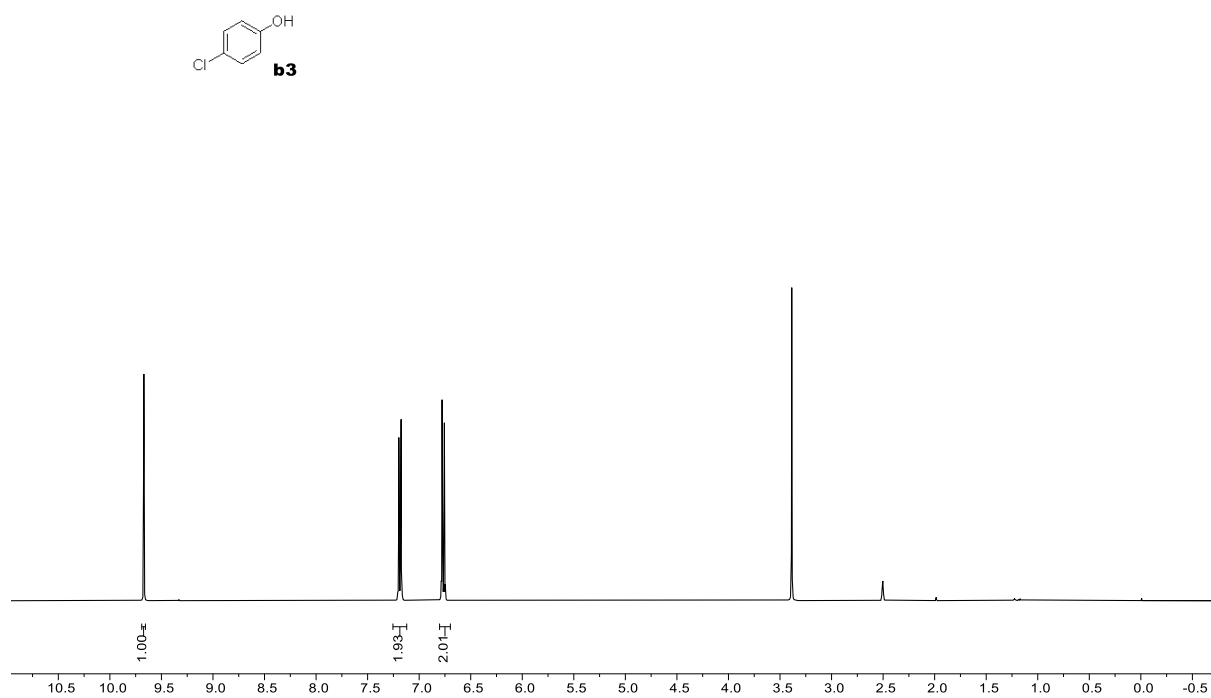

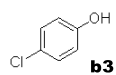

— 156.7731  
— 129.5757  
— 122.7940  
— 117.3828

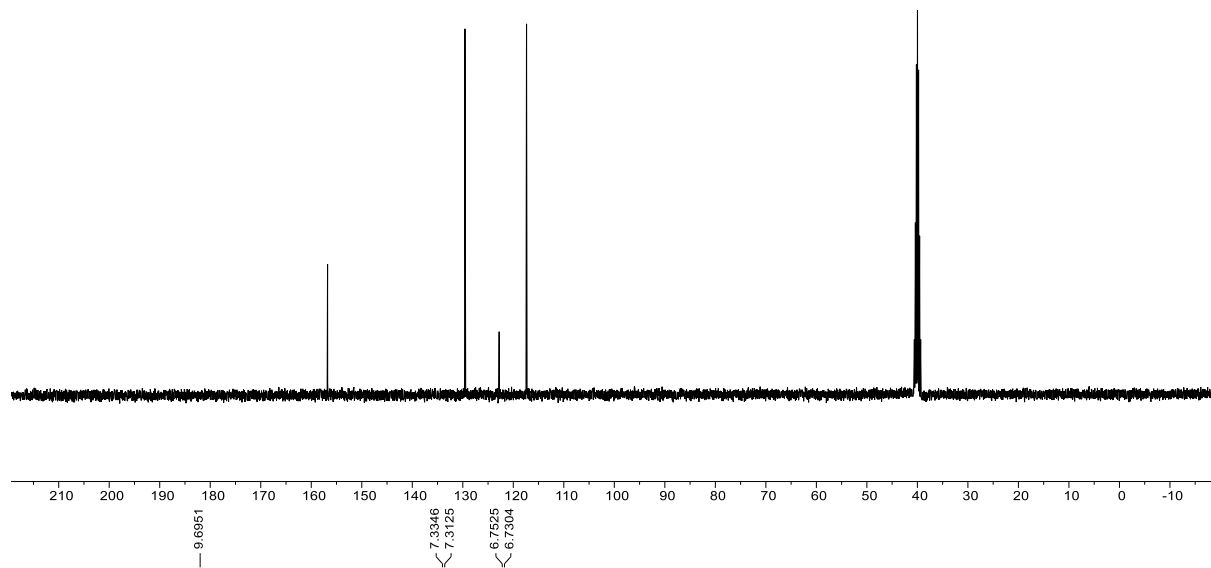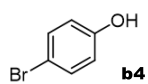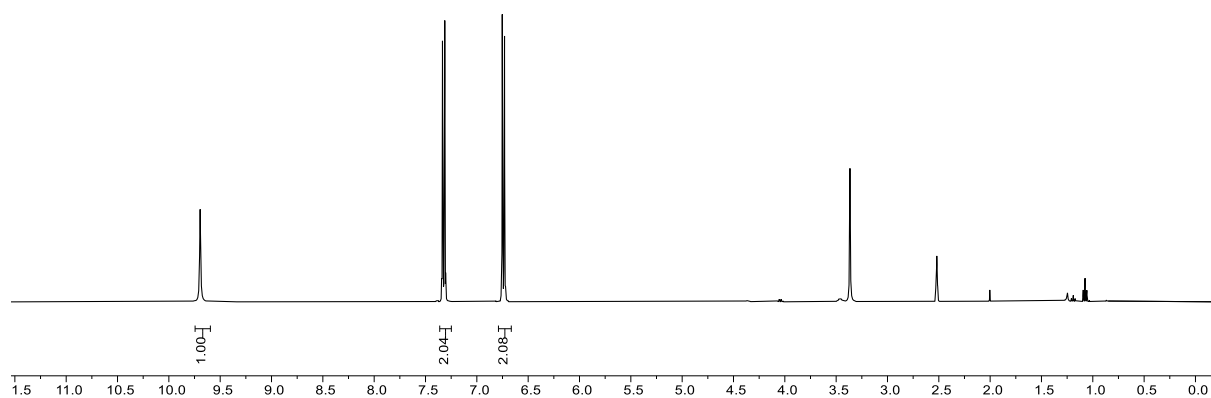

— 157.2585  
— 132.5170  
— 118.0454  
— 110.4020

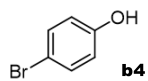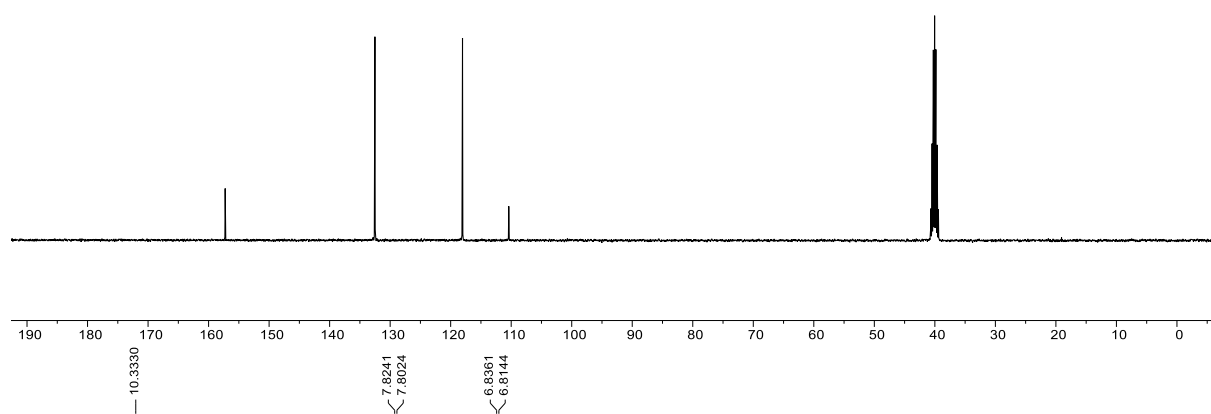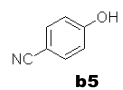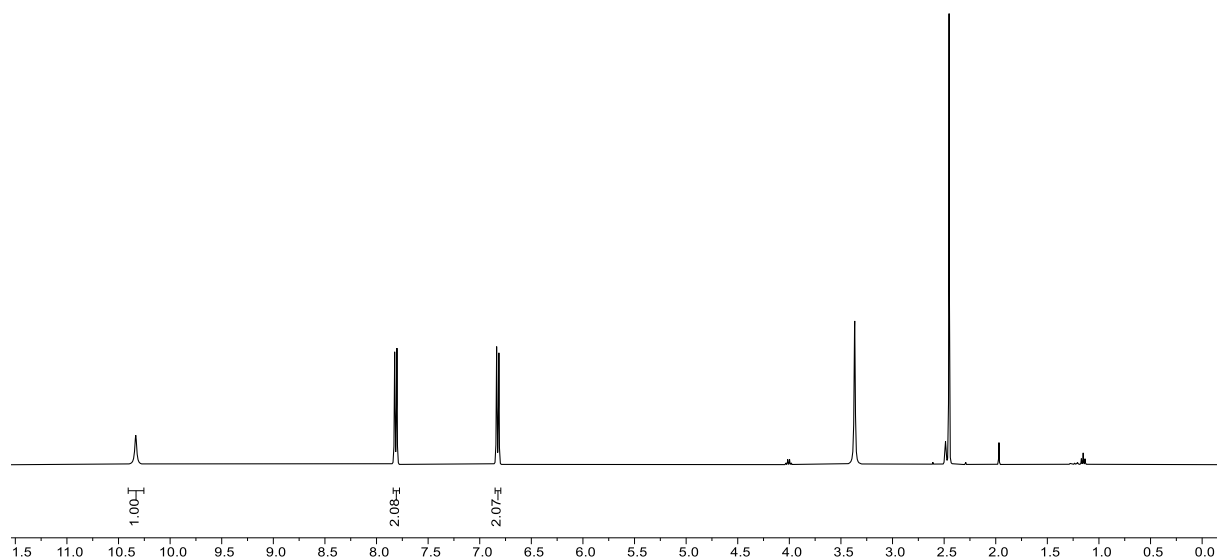

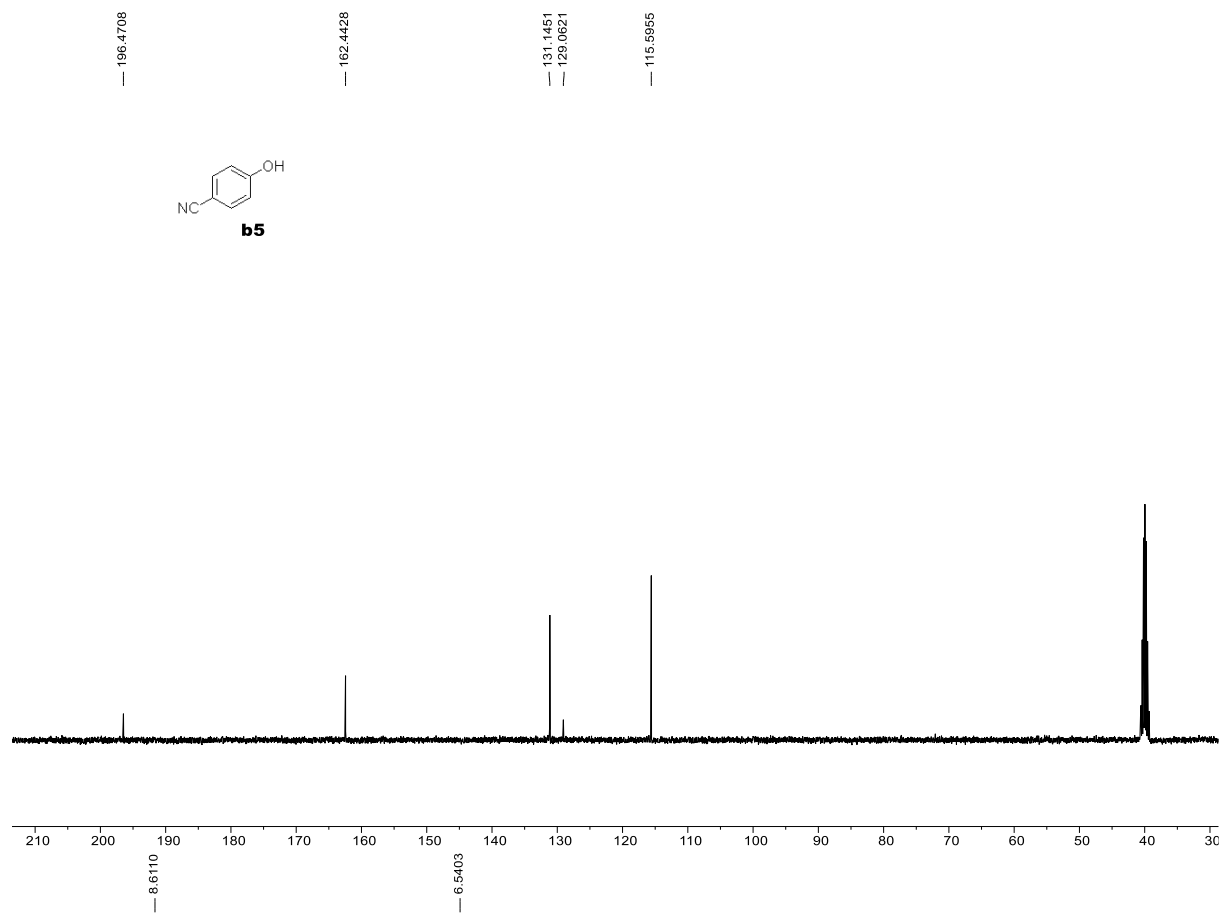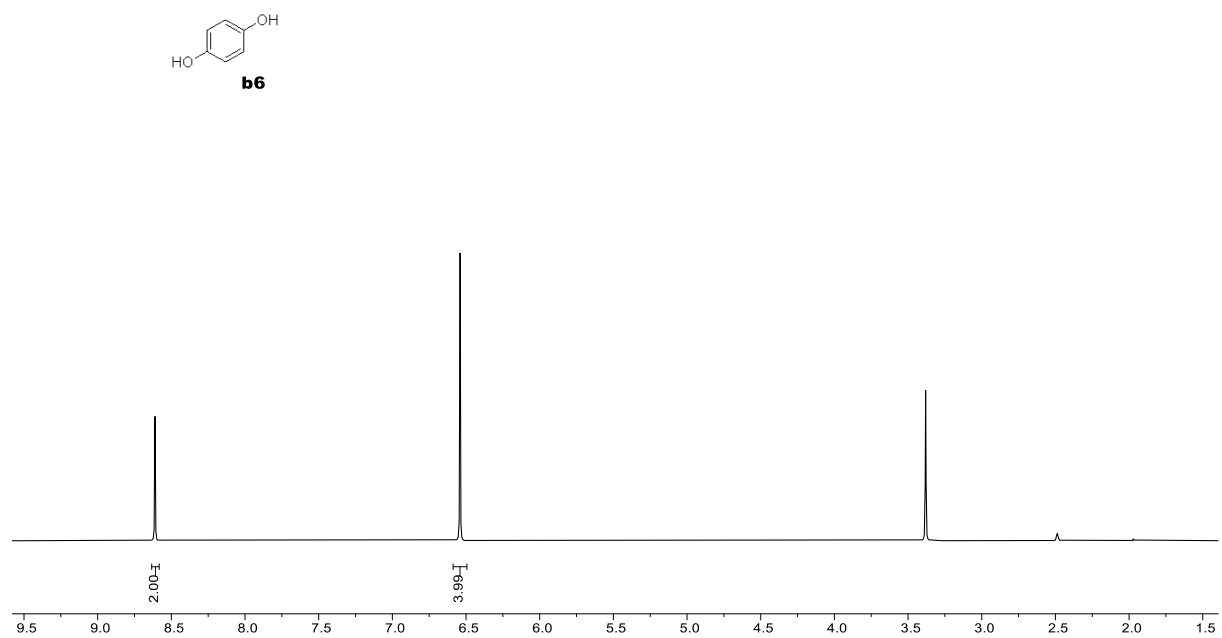

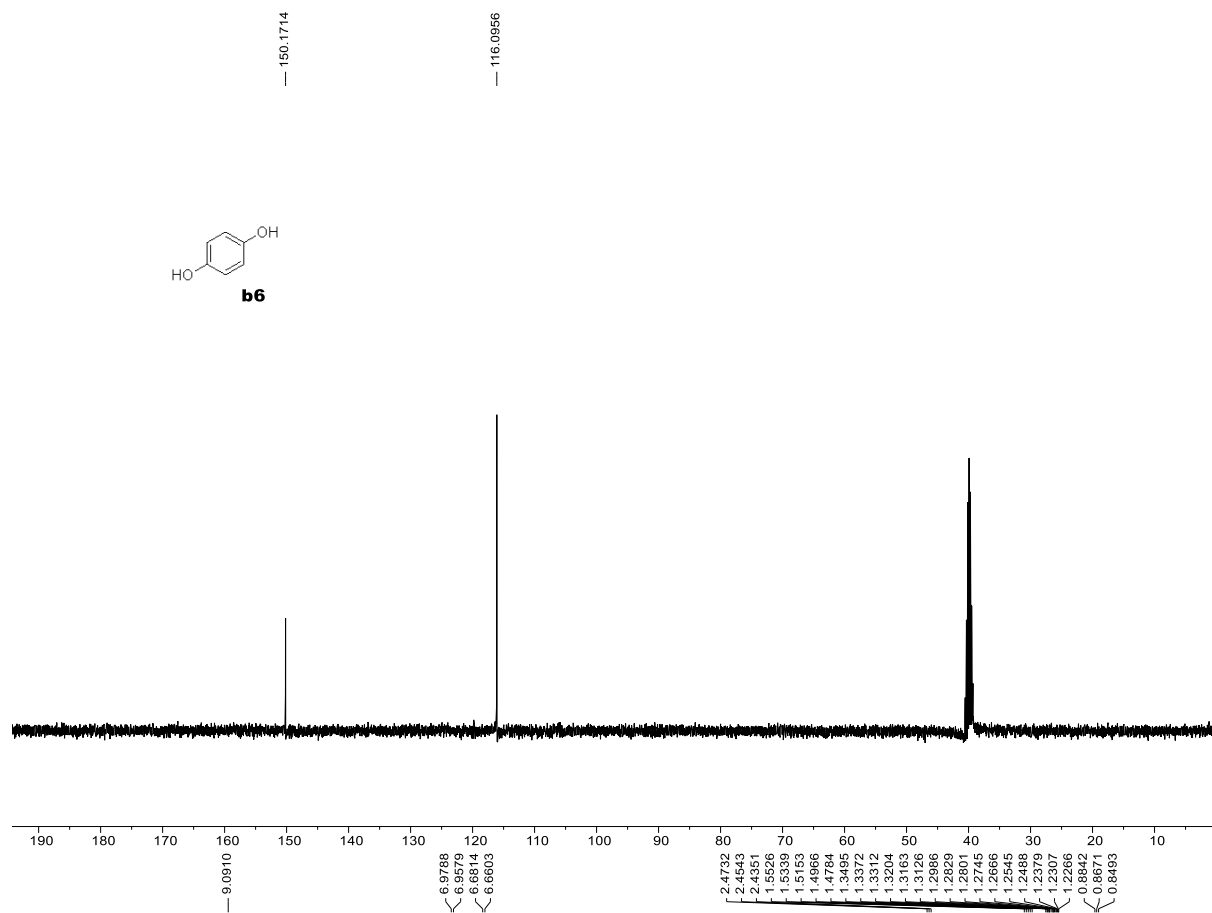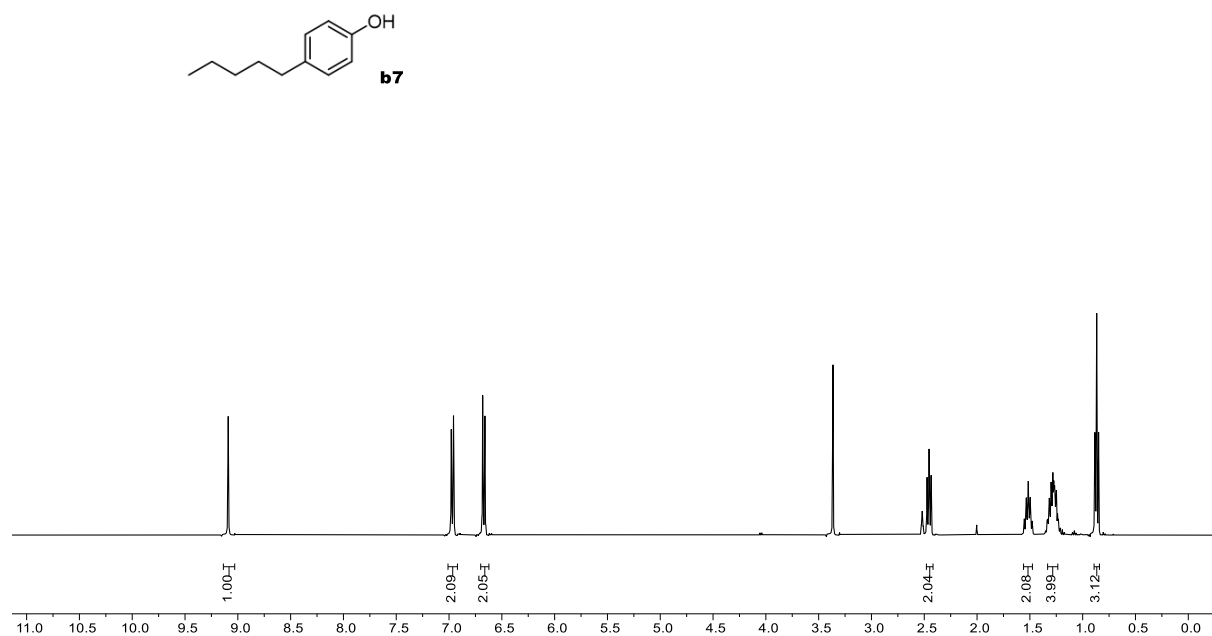



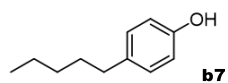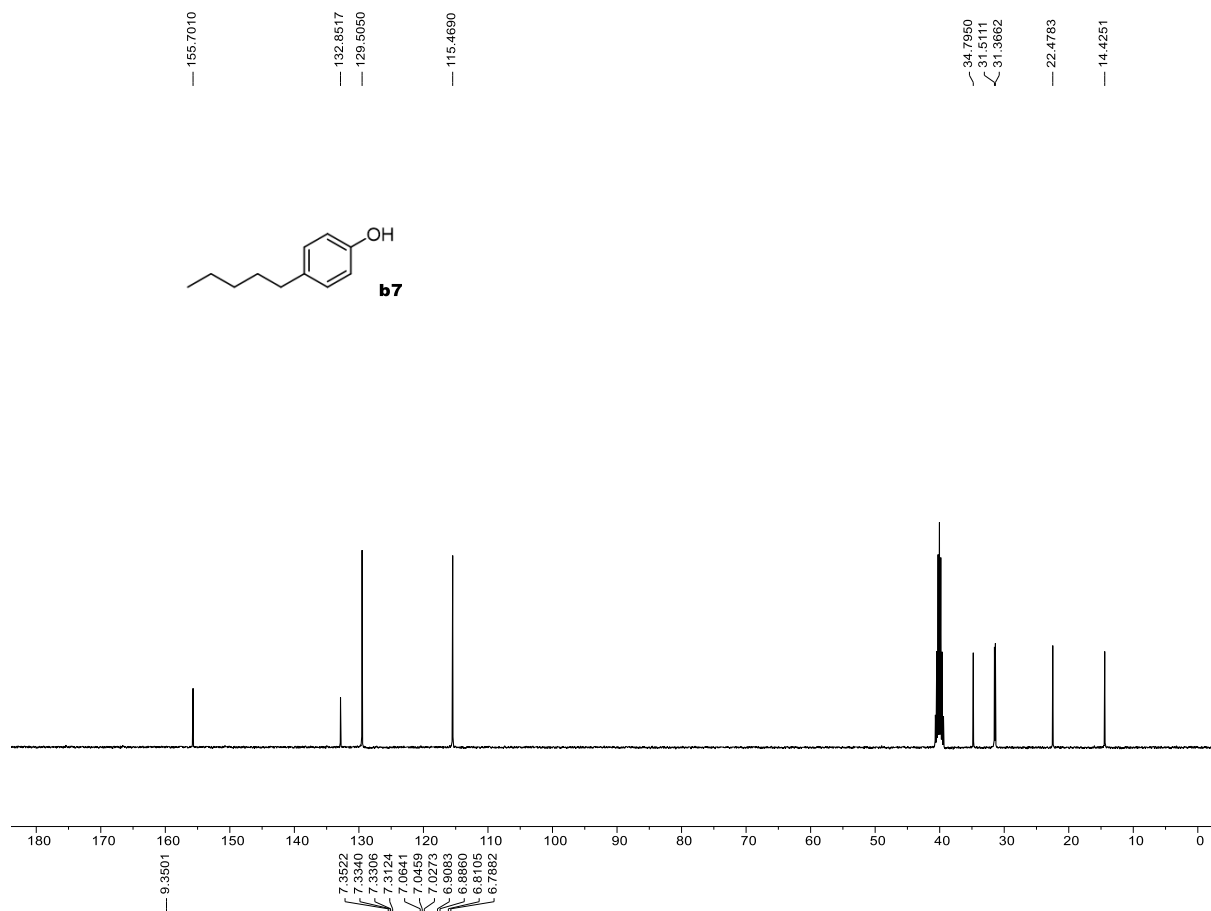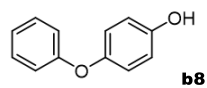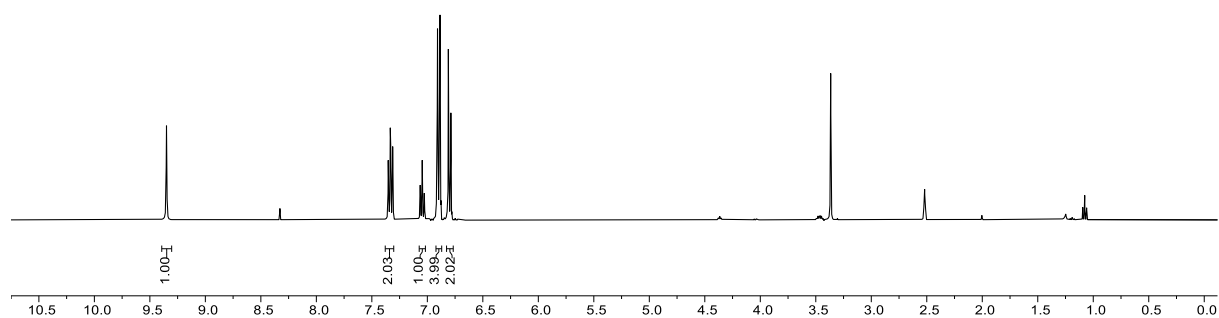

— 158.9226  
 — 154.3610  
 — 148.3427  
 — 130.2797  
 ~ 122.6940  
 ~ 121.4490  
 ~ 117.3984  
 ~ 116.7515

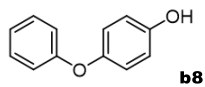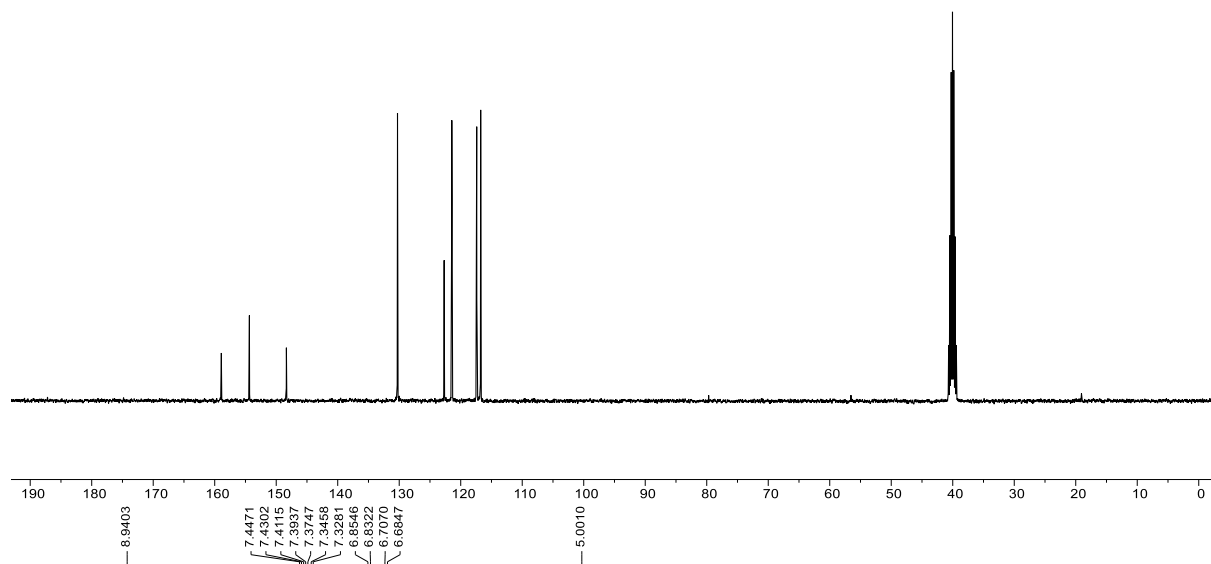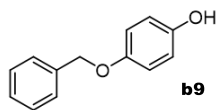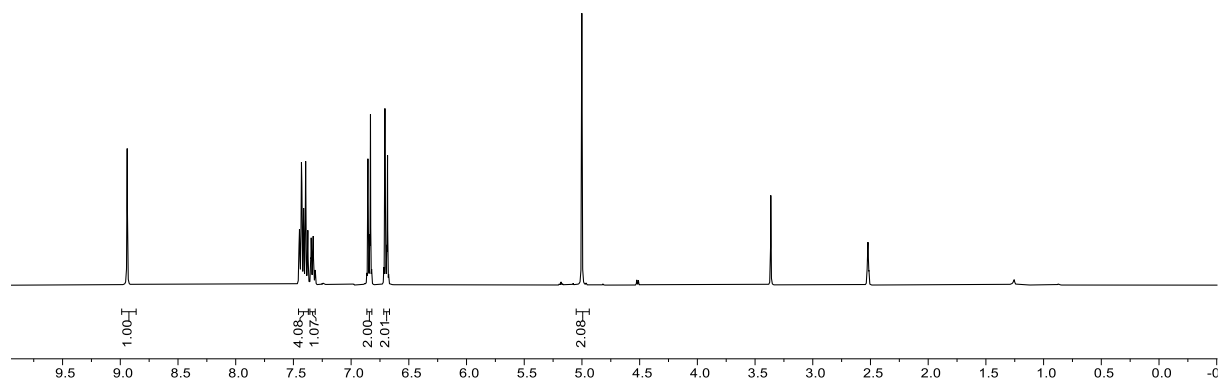

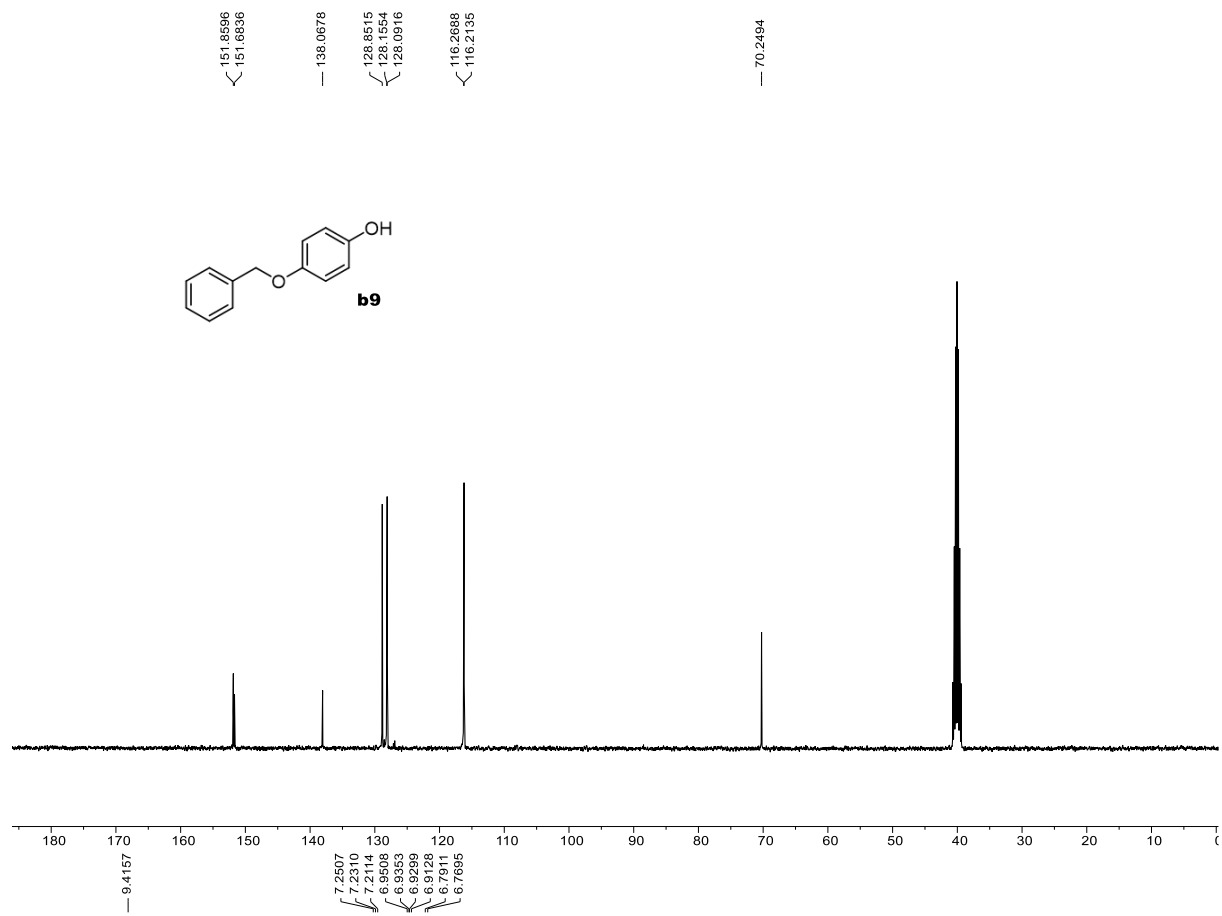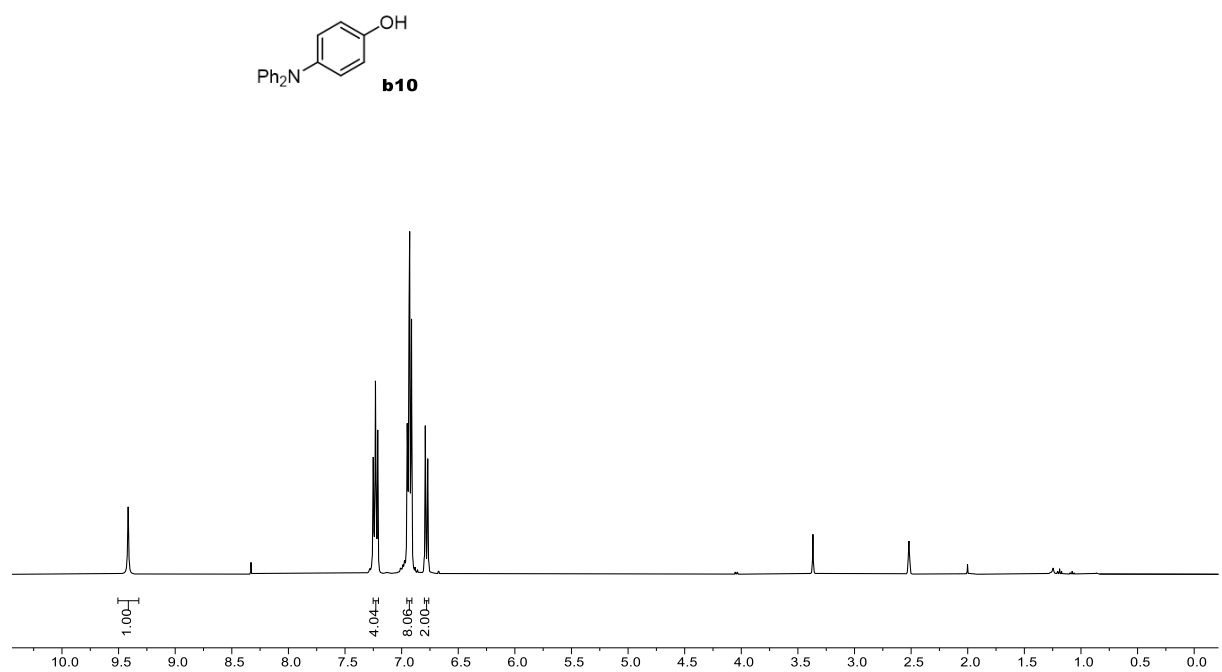

— 155.0492  
 — 148.3077  
 — 138.7276  
 < 129.7064  
 < 128.4541  
 < 122.3843  
 < 122.0232  
 — 116.9088

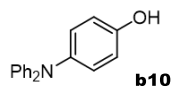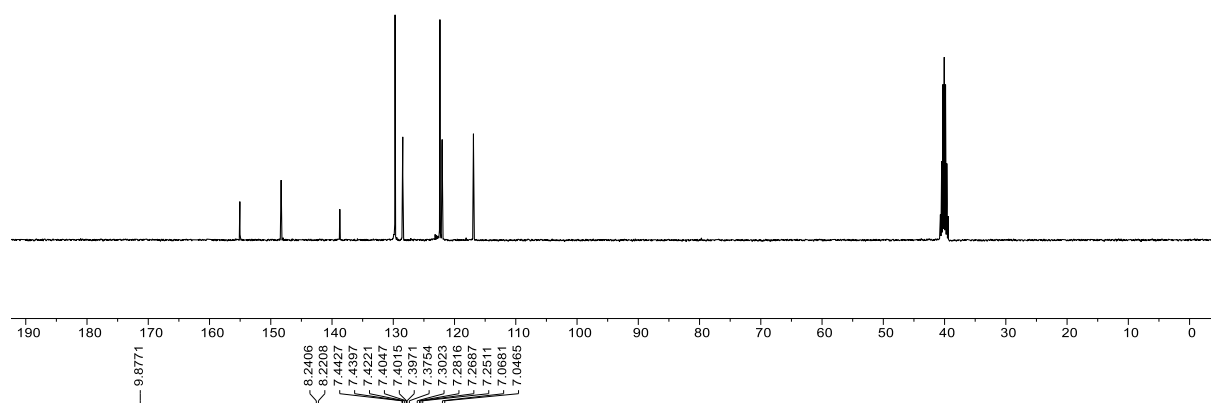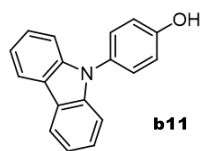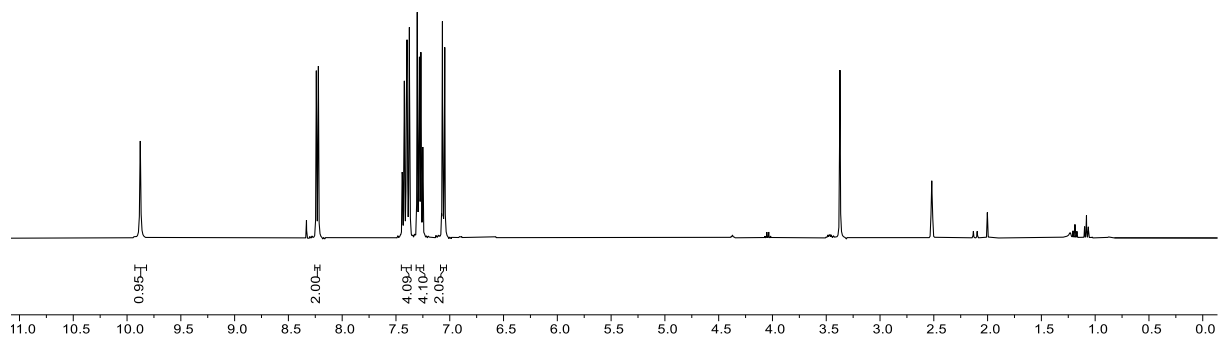

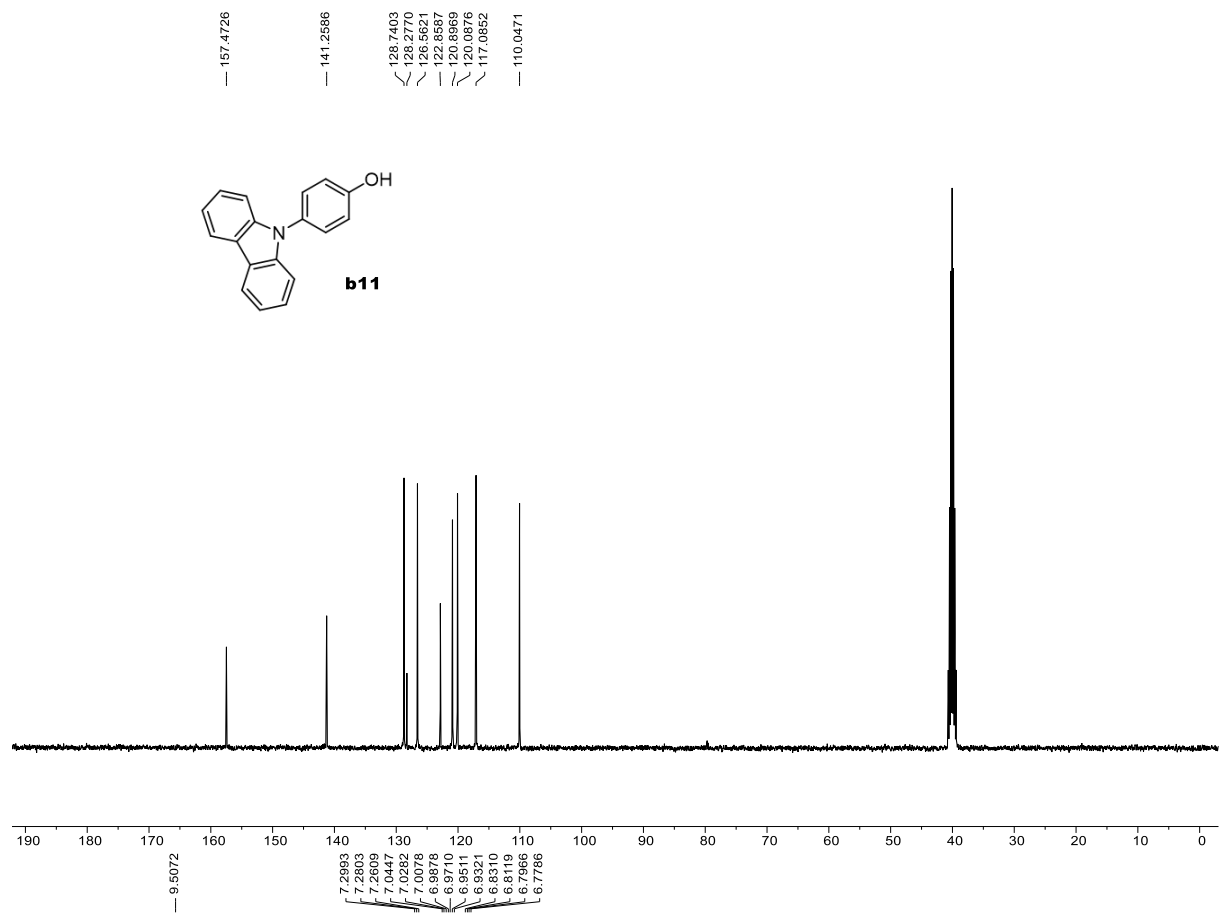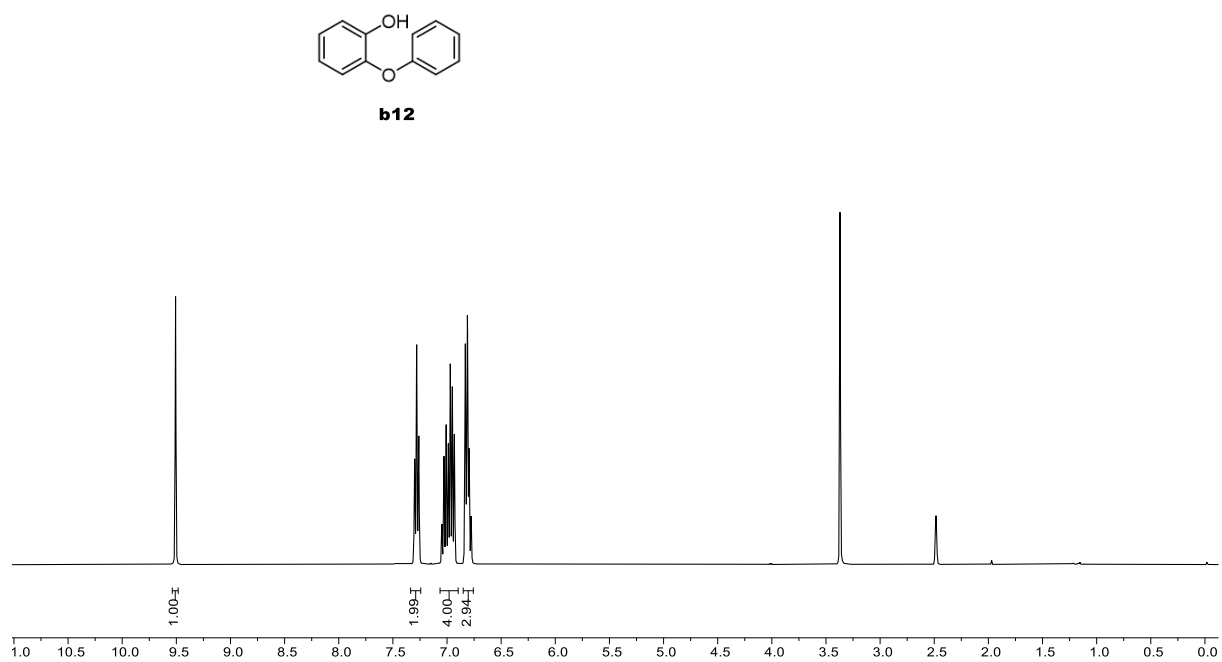

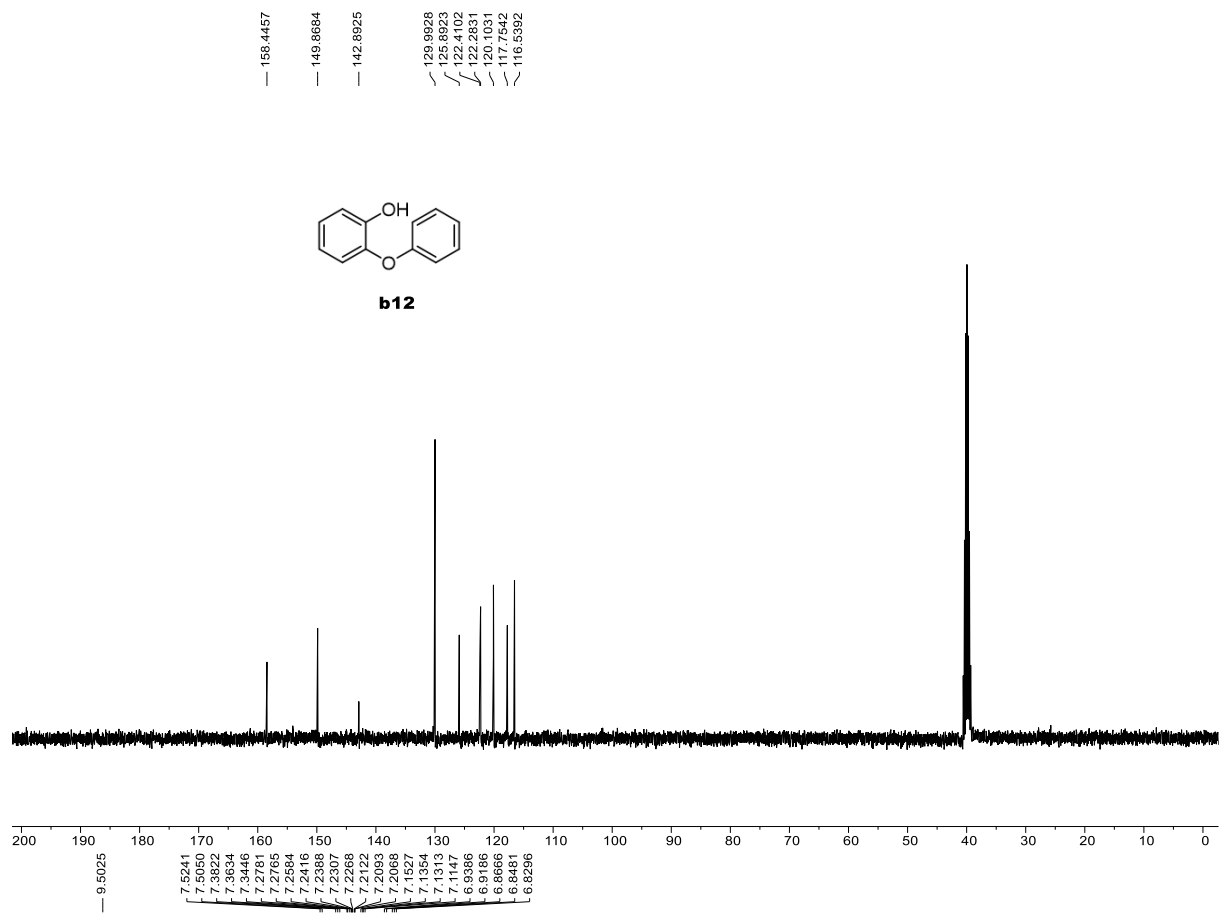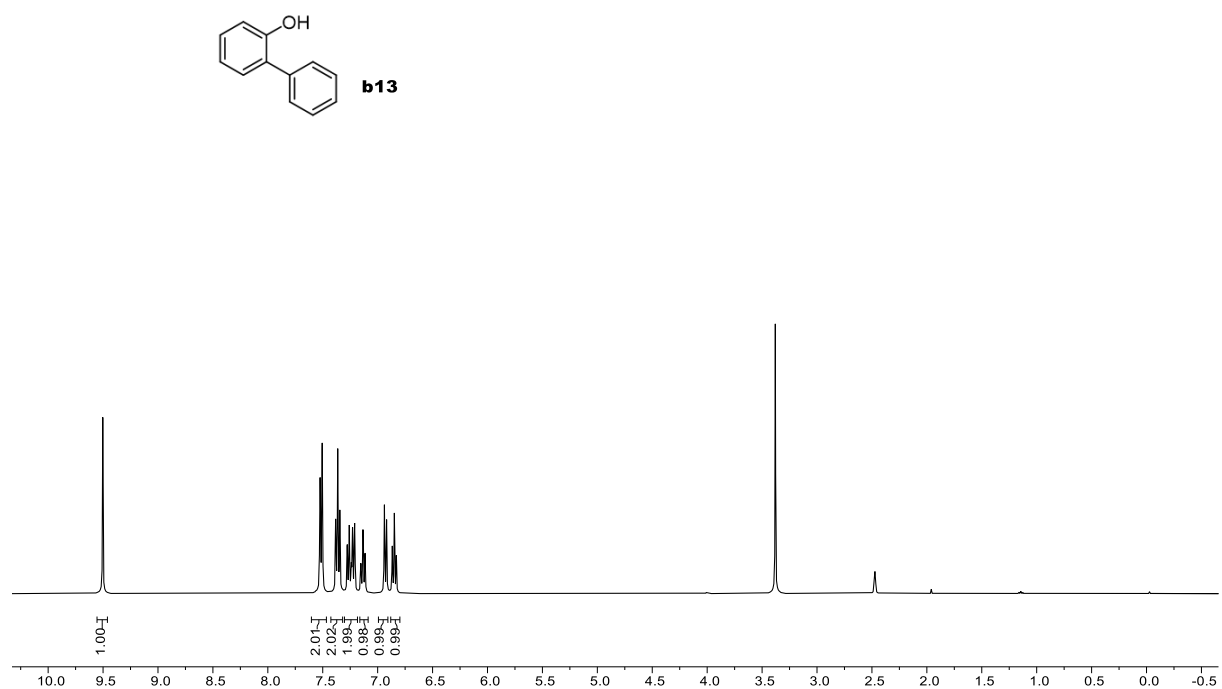

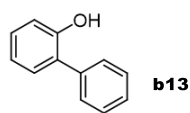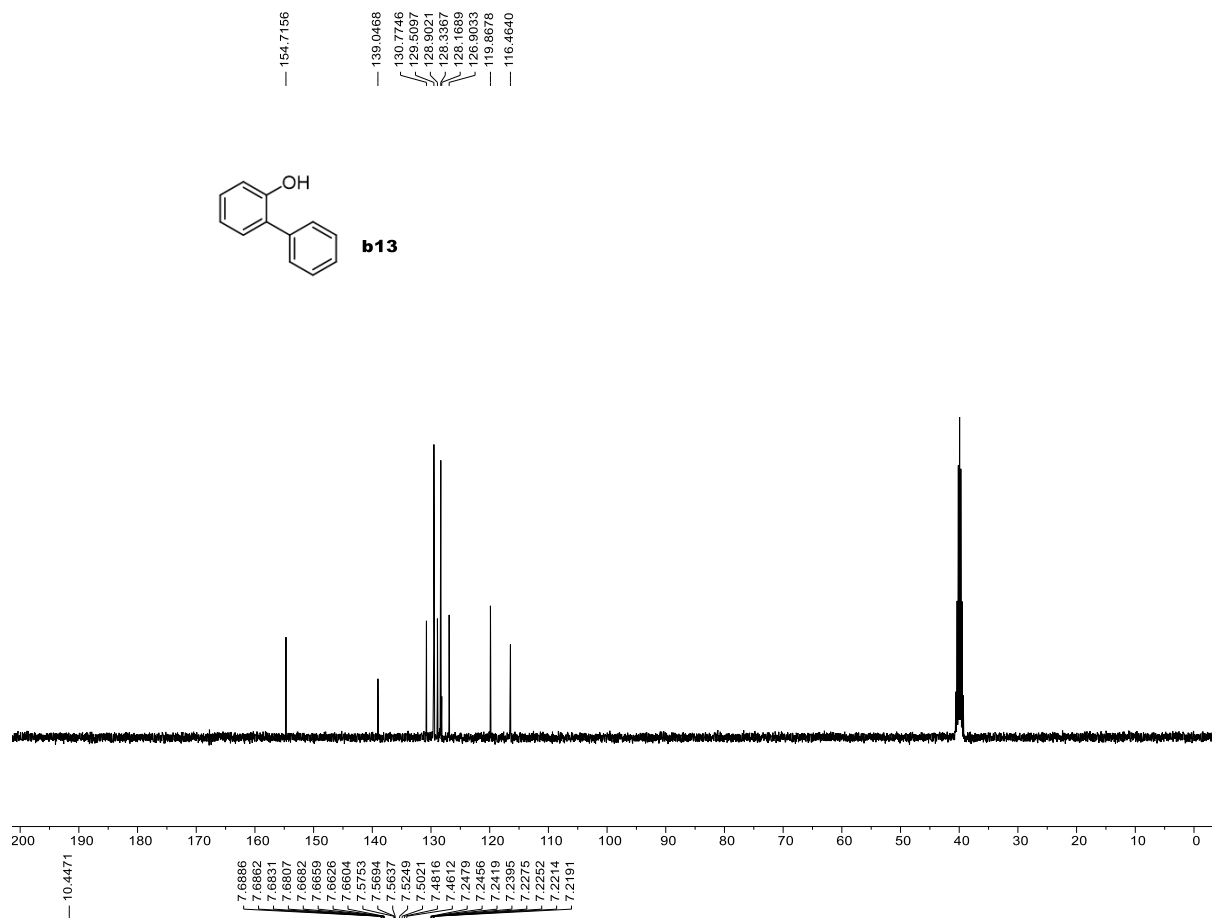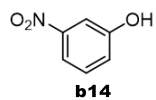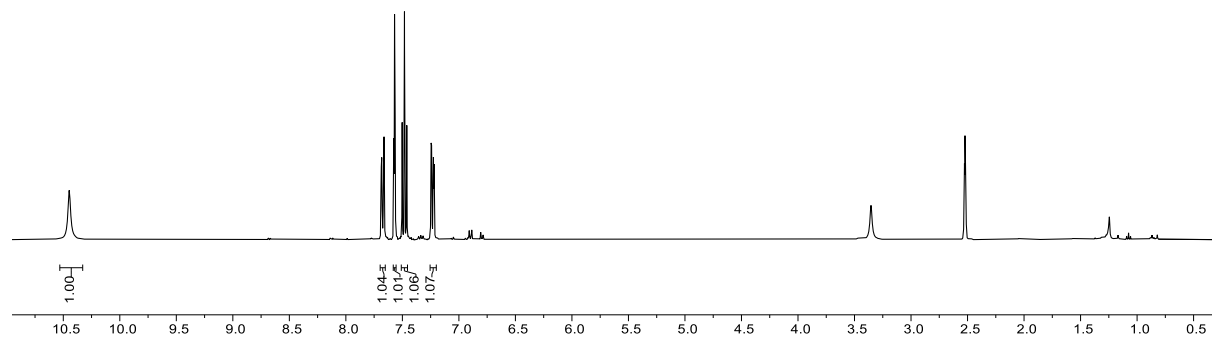

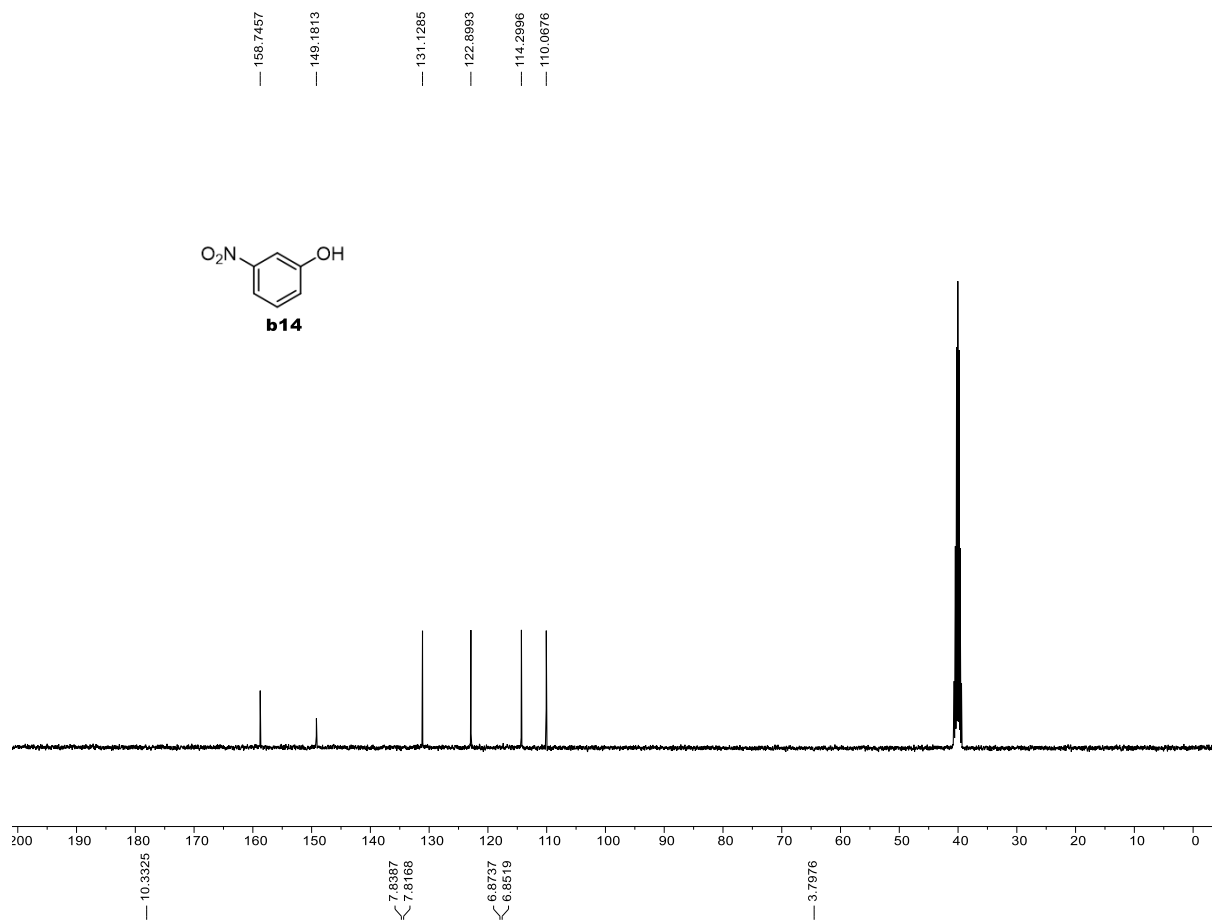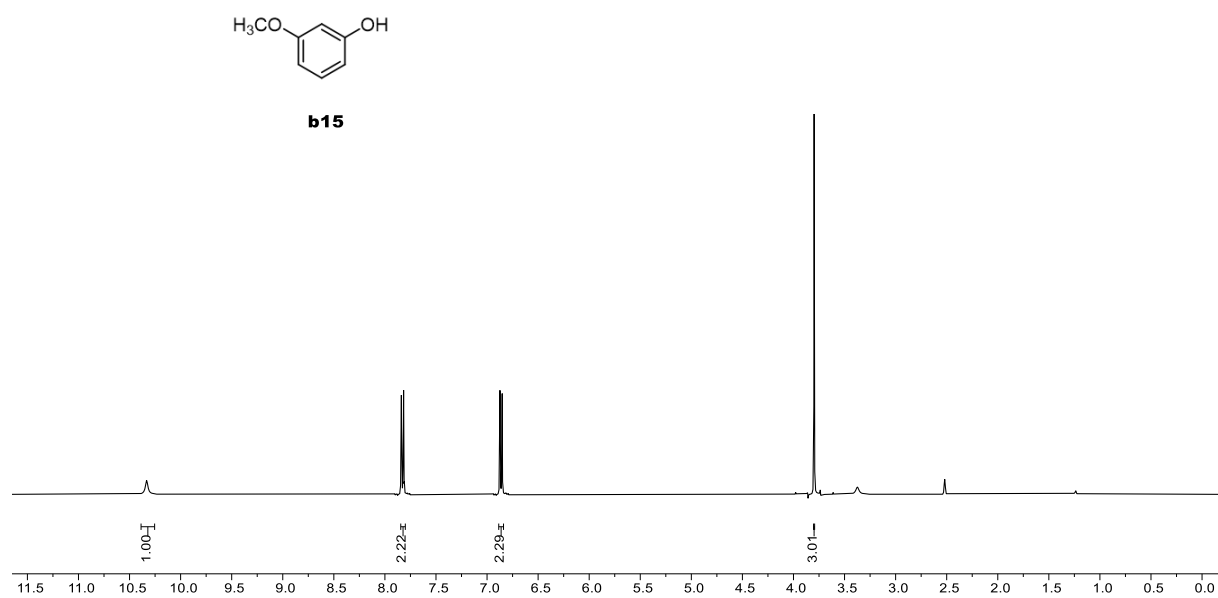



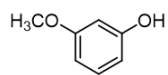

**b15**

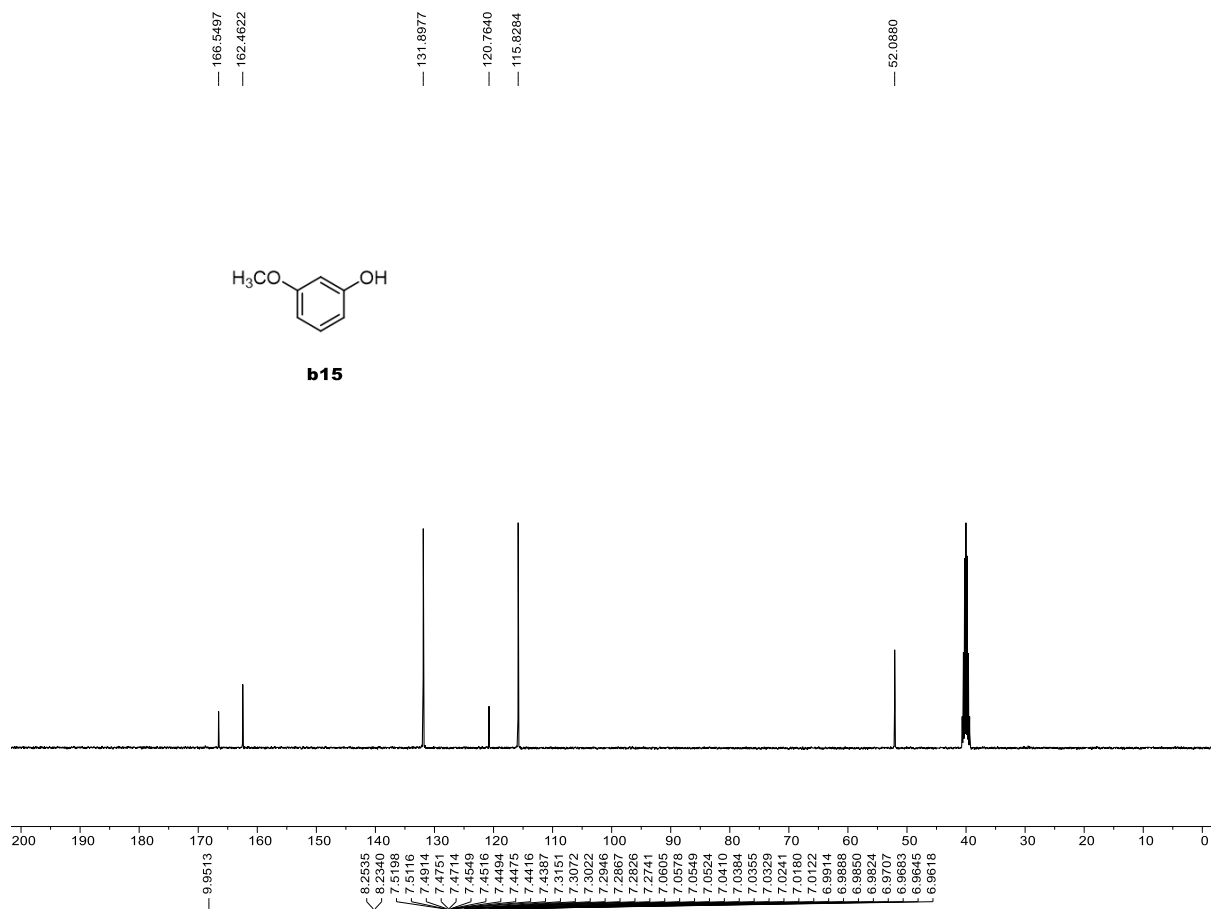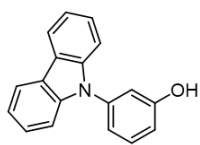

**b16**

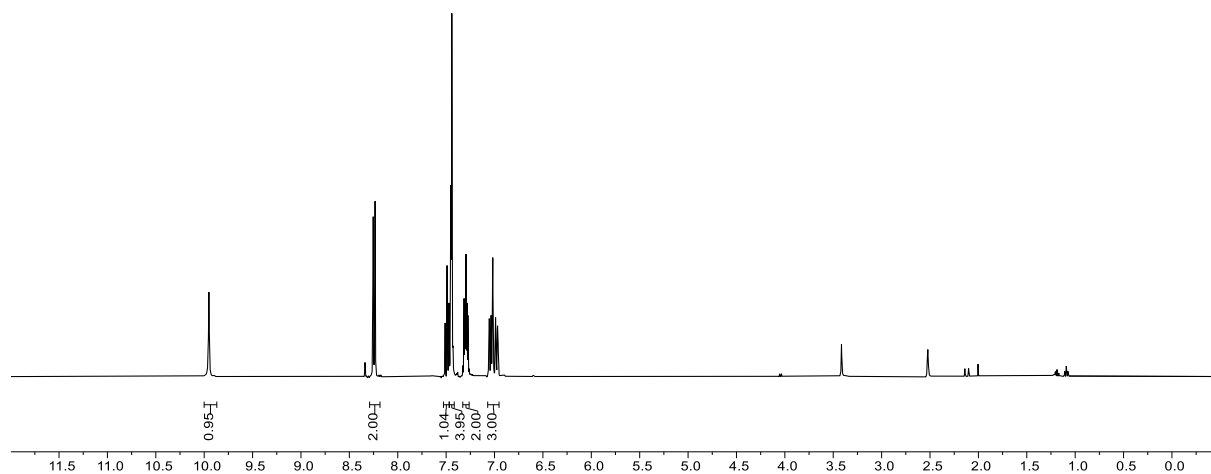

— 159.3147  
 — 140.5608  
 — 138.3634  
 — 131.3984  
 — 126.8945  
 — 123.1880  
 — 120.9815  
 — 120.4601  
 — 117.4930  
 — 115.3007  
 — 113.8381  
 — 110.2631

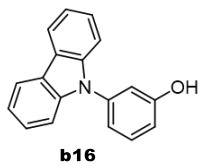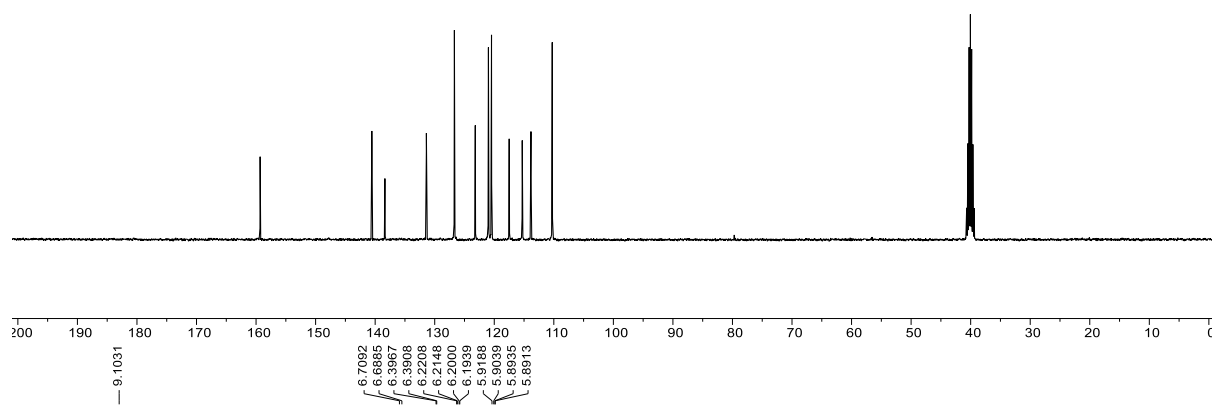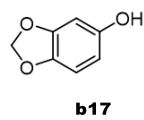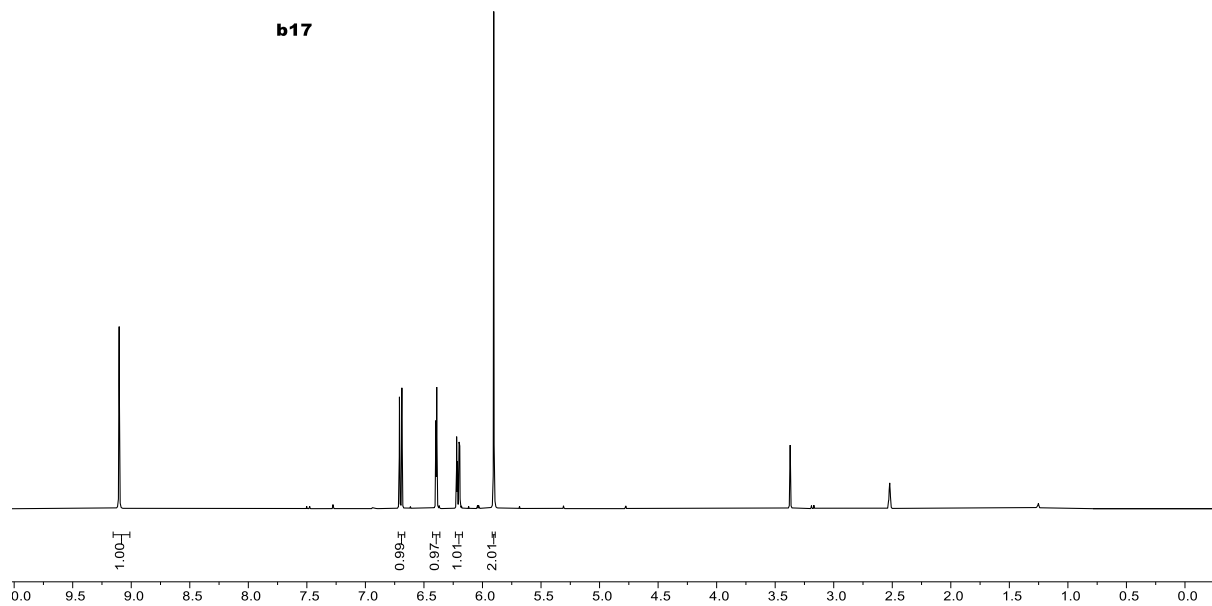

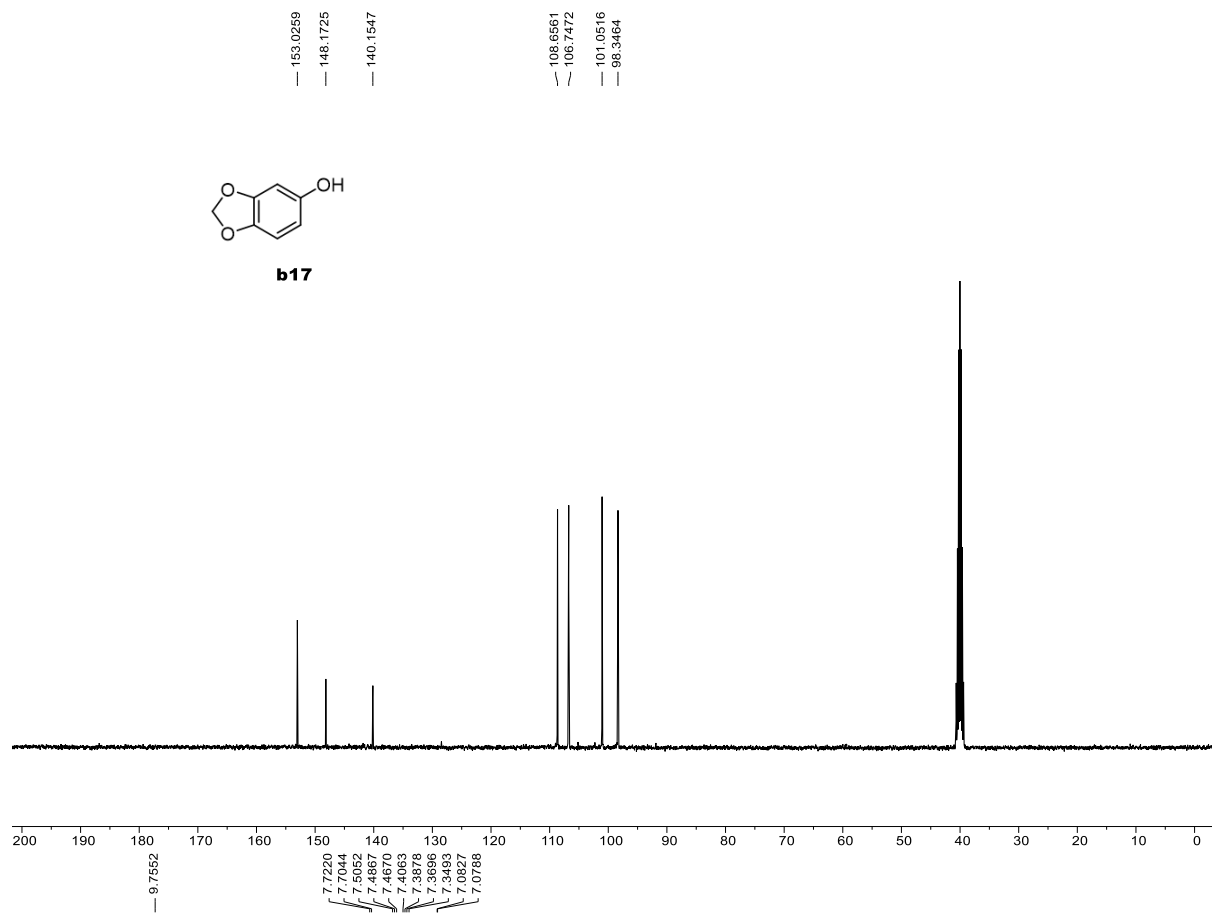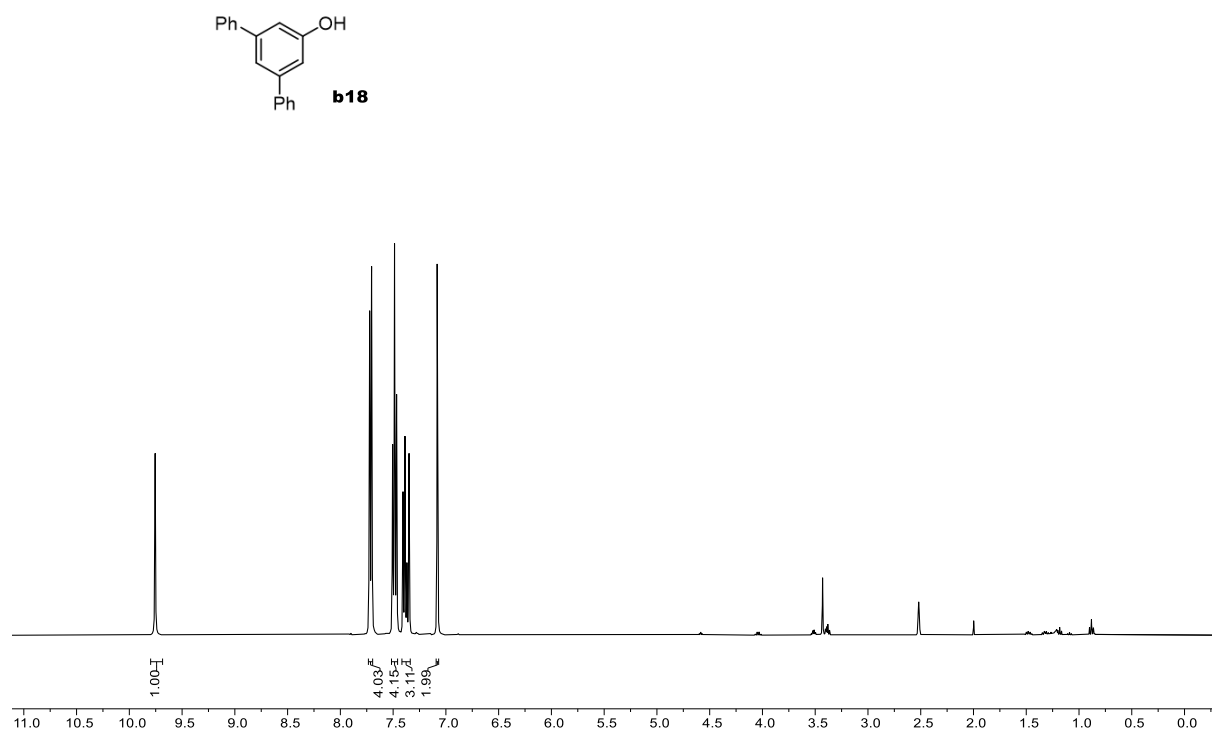

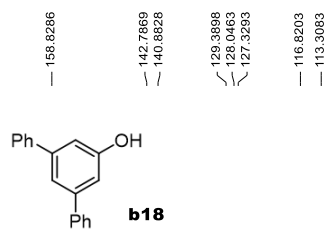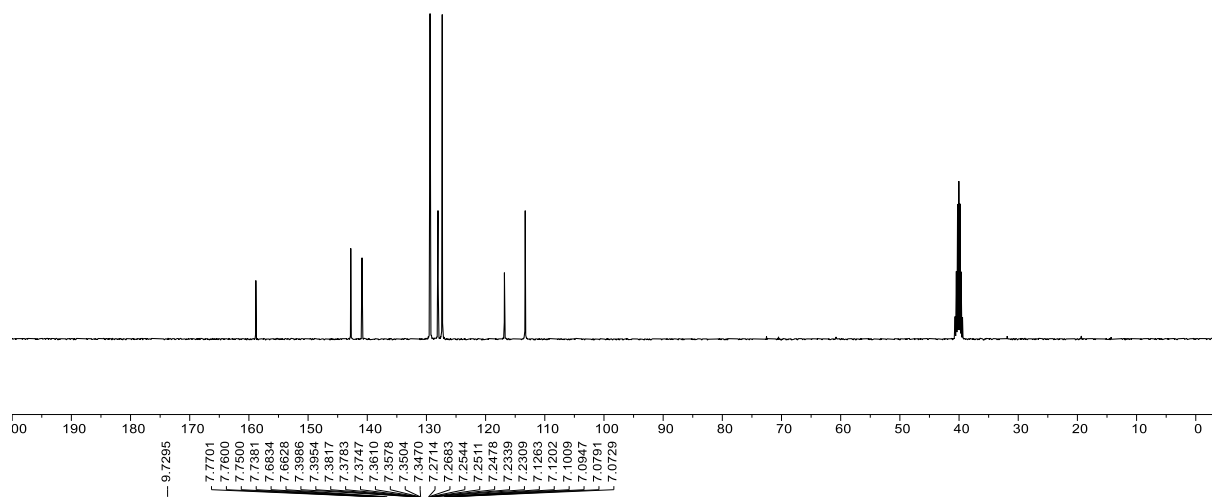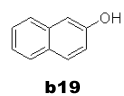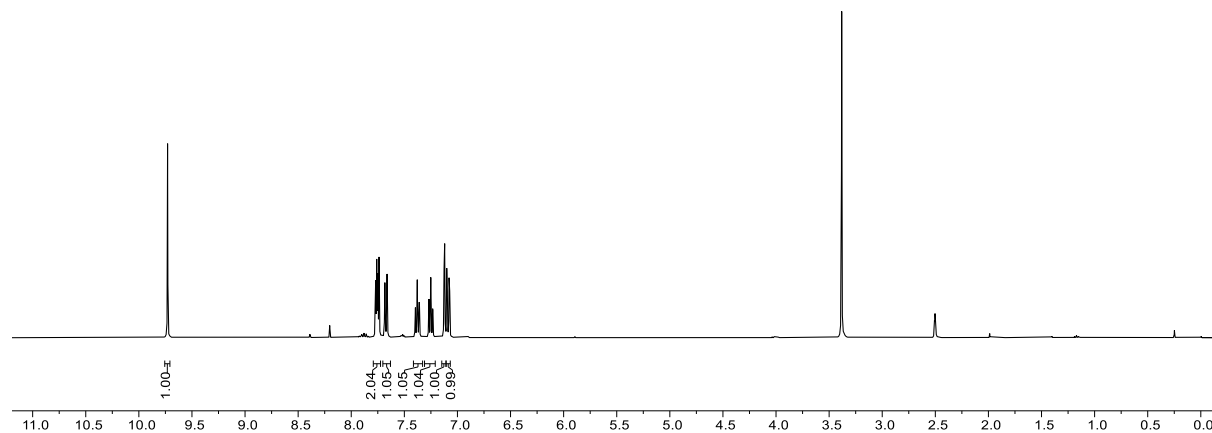

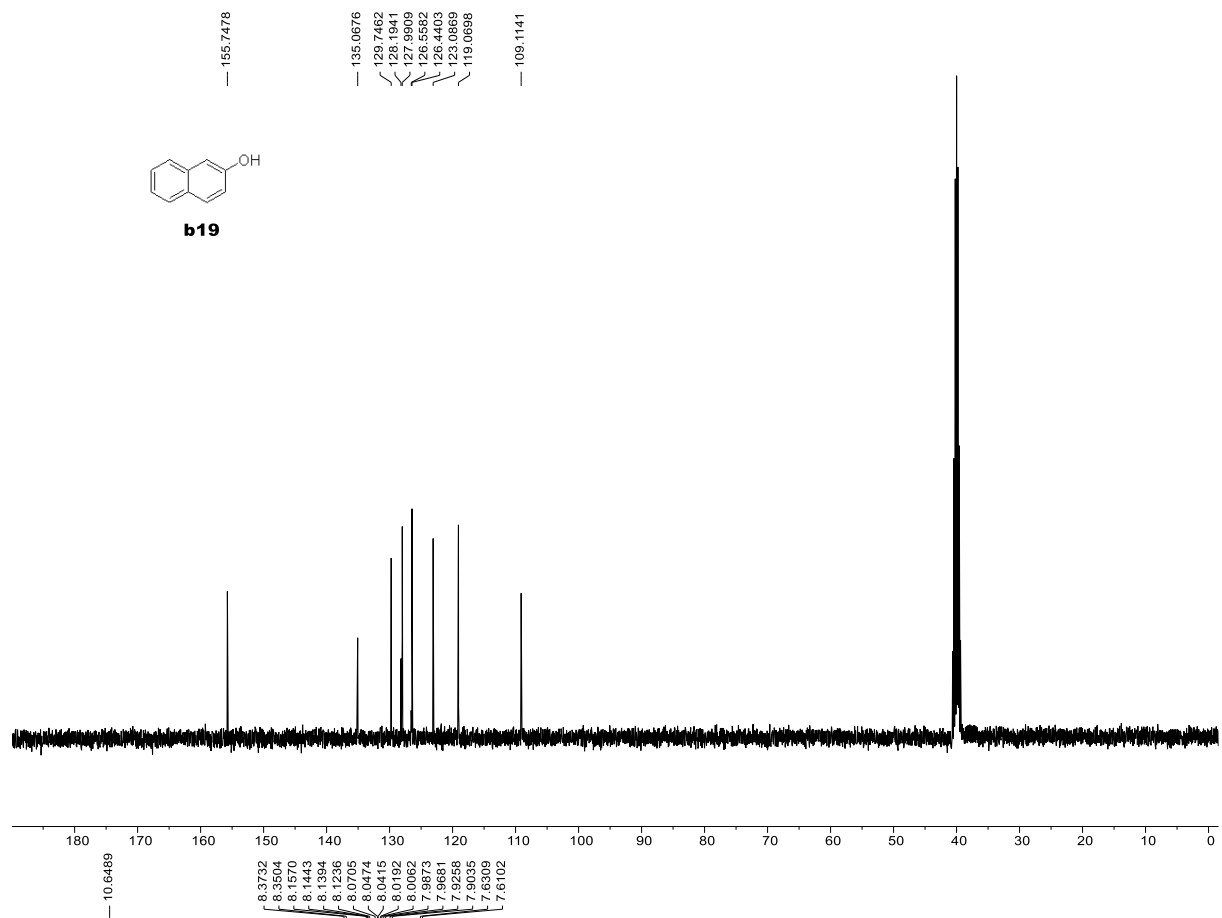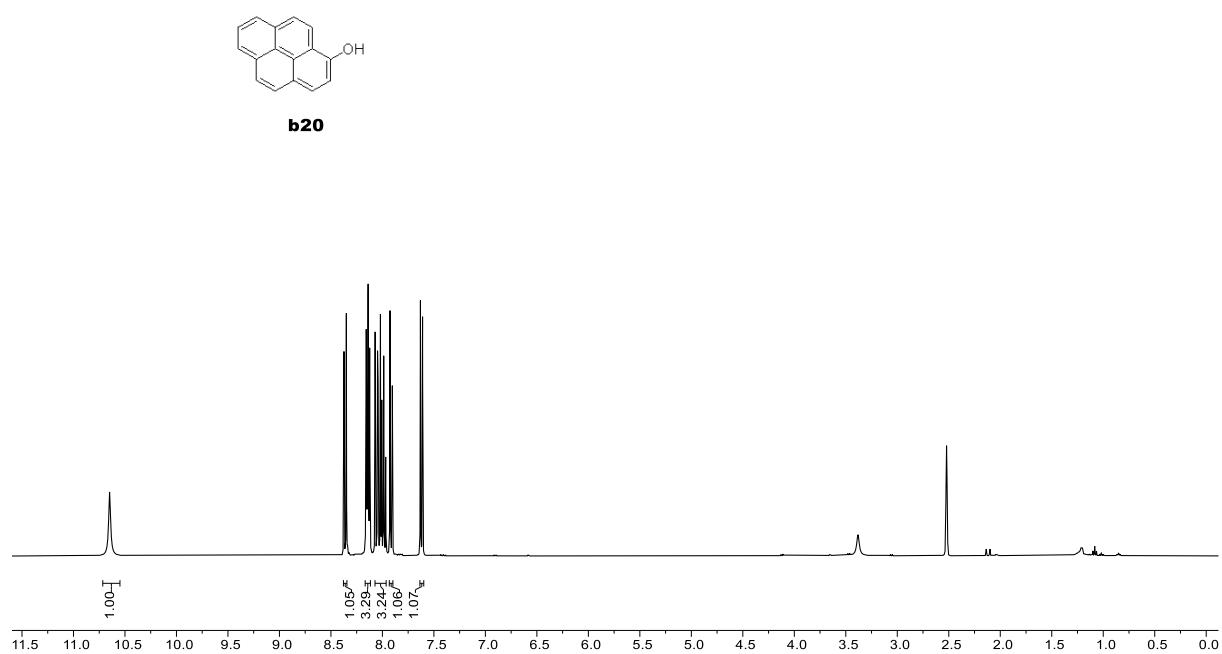

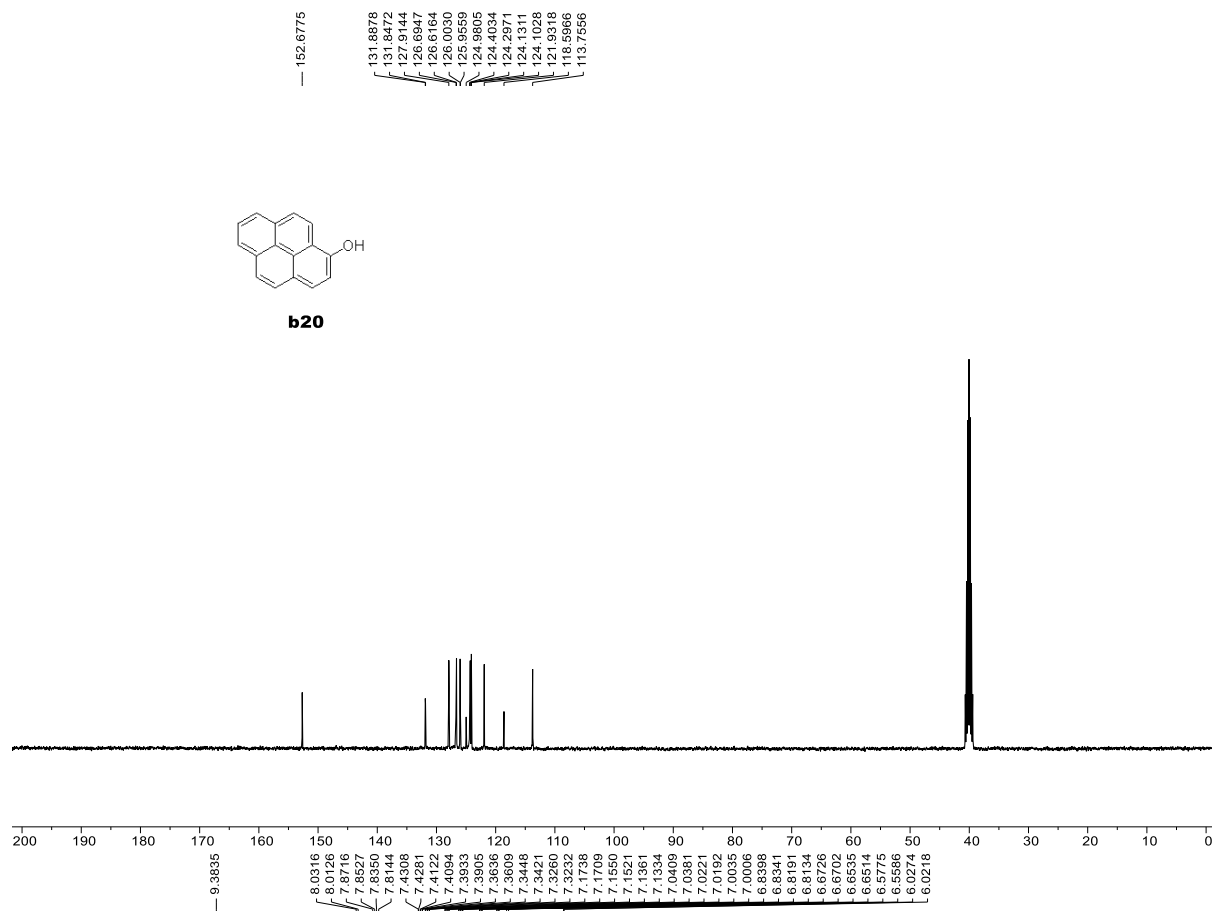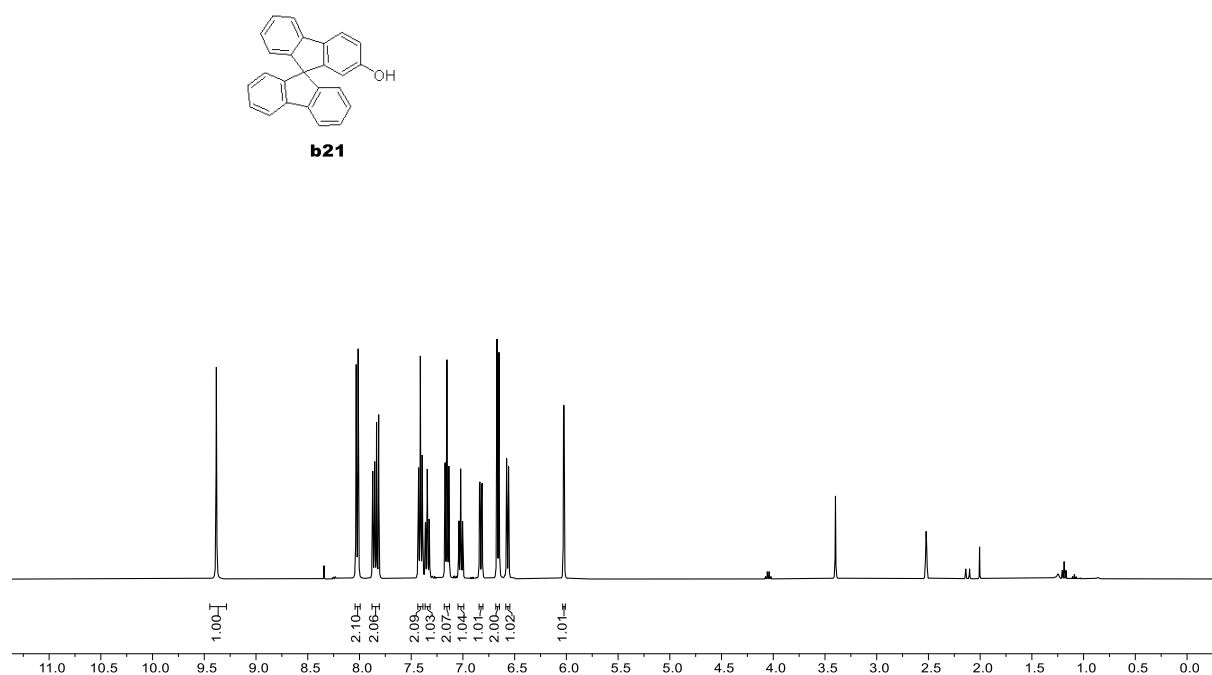

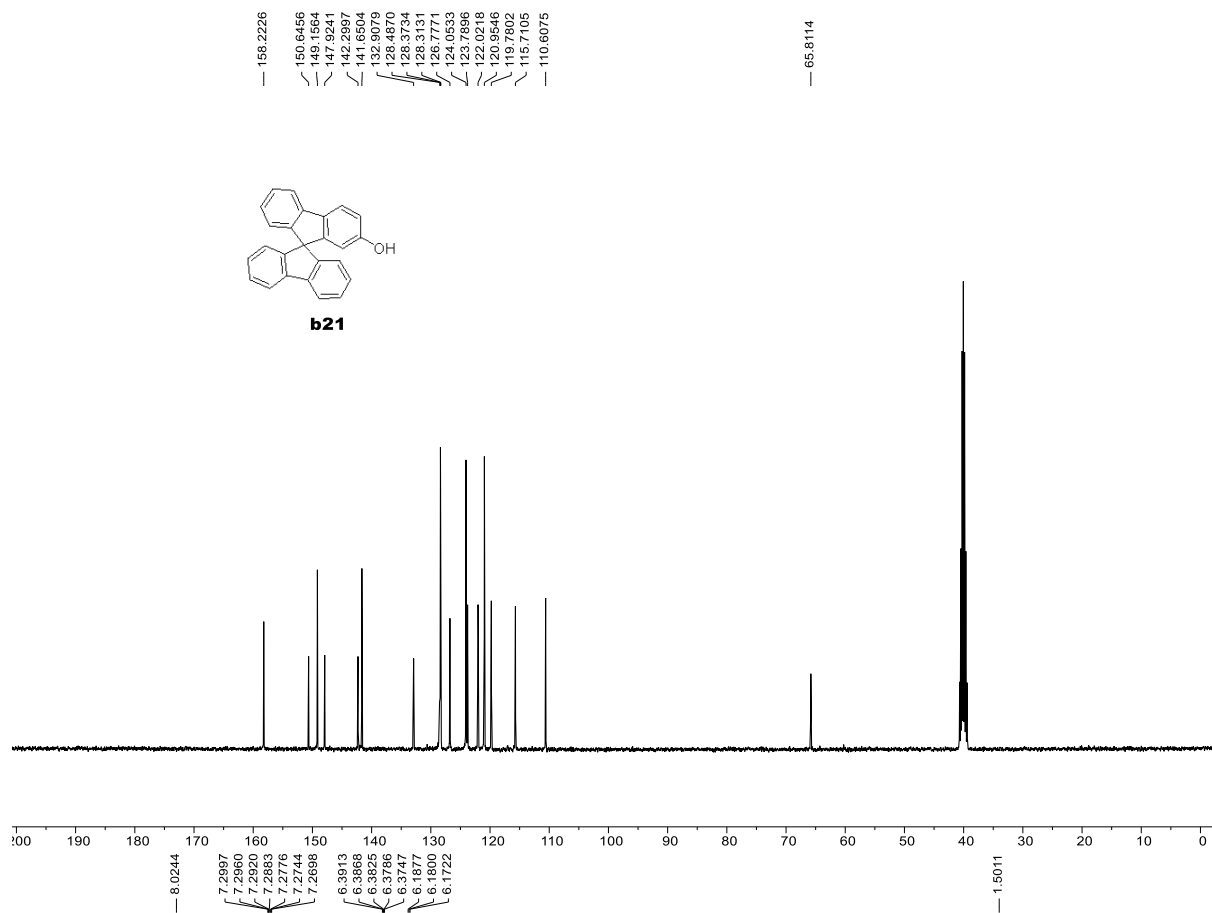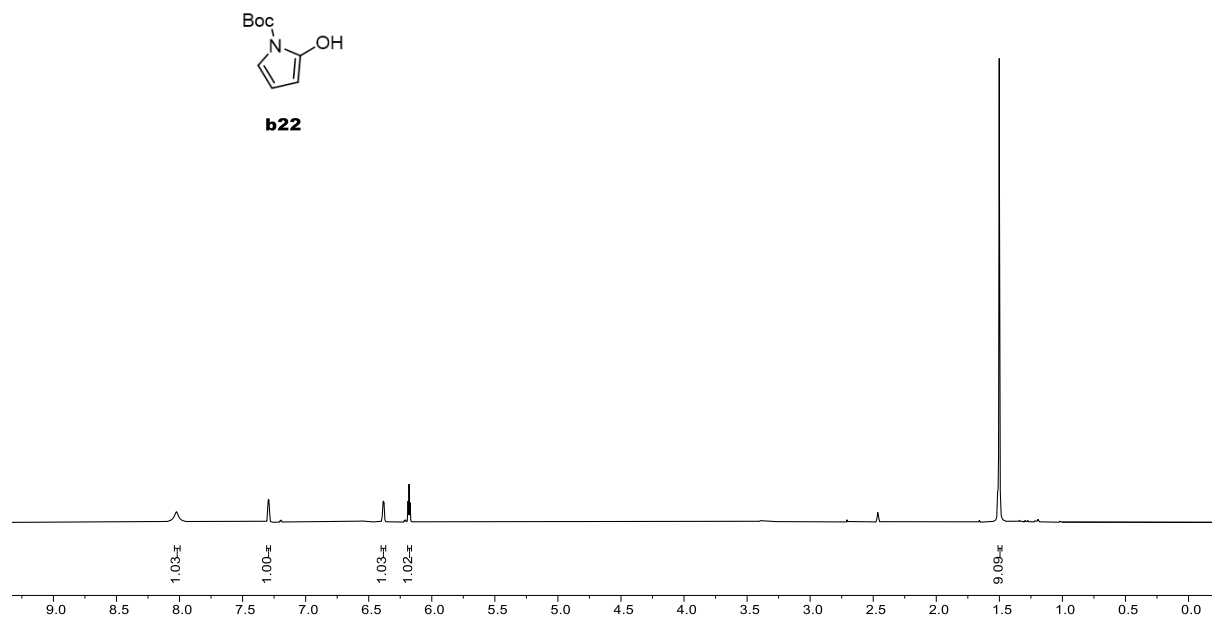

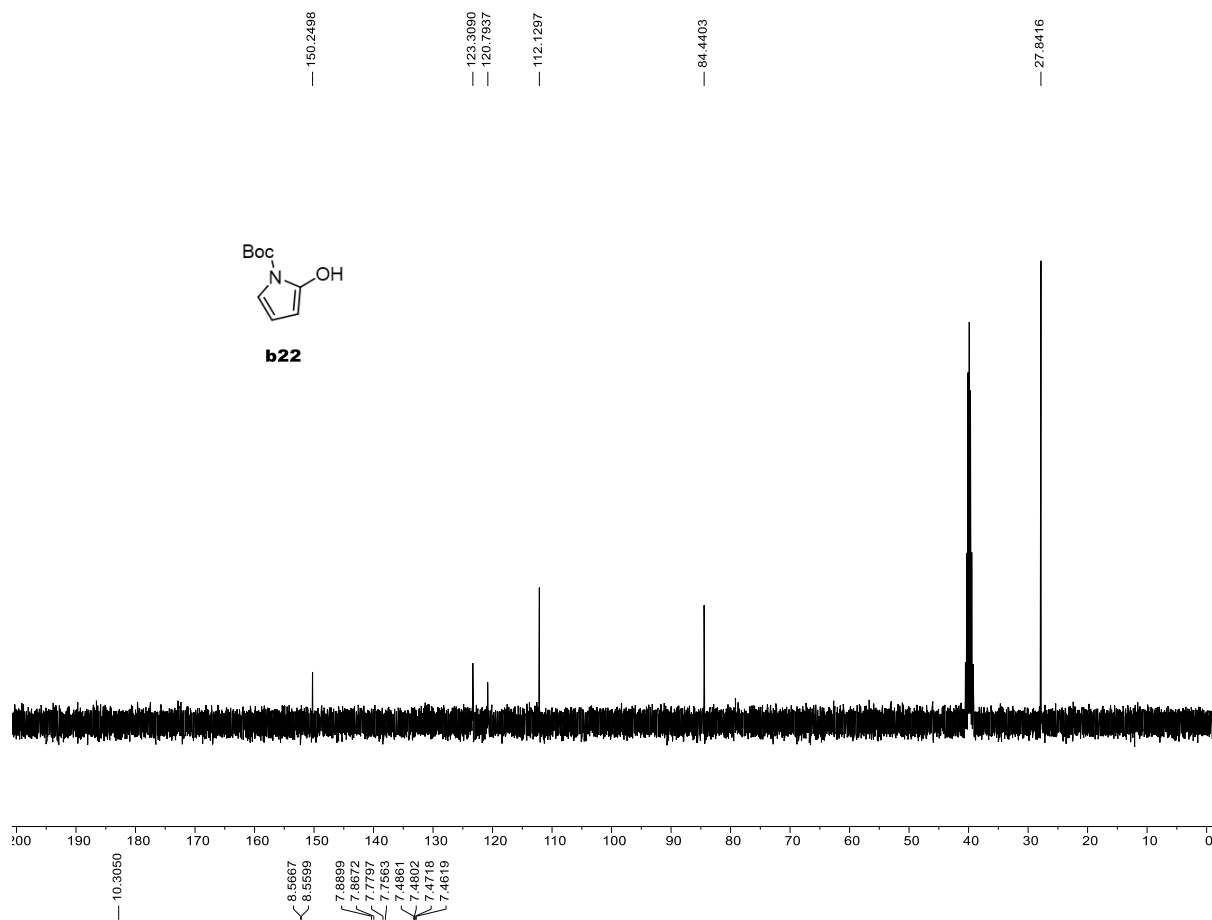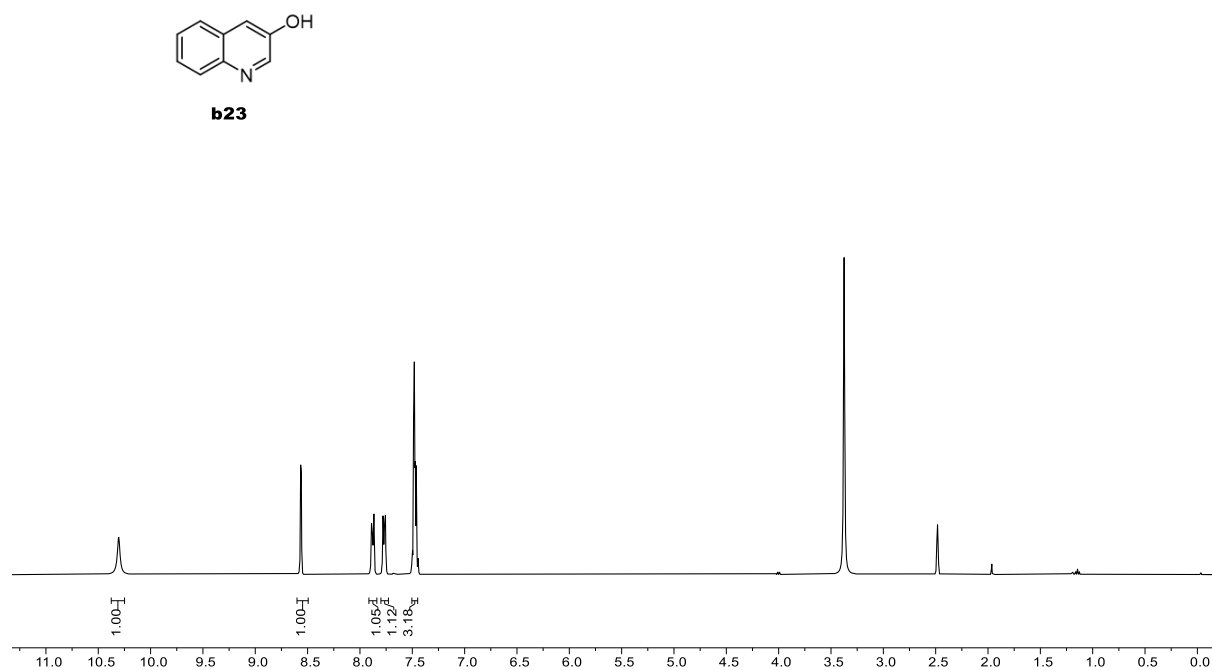



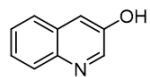

**b23**

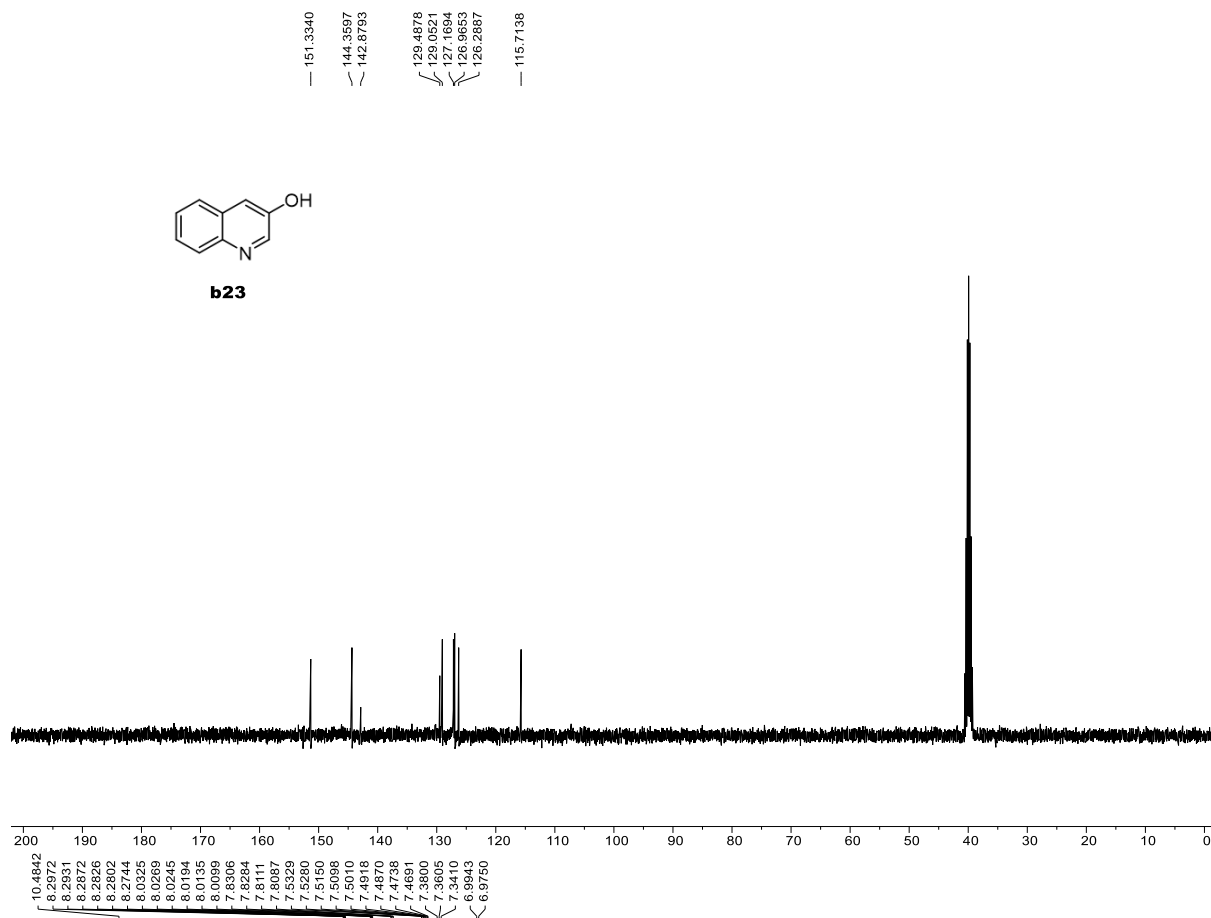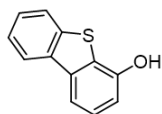

**b24**

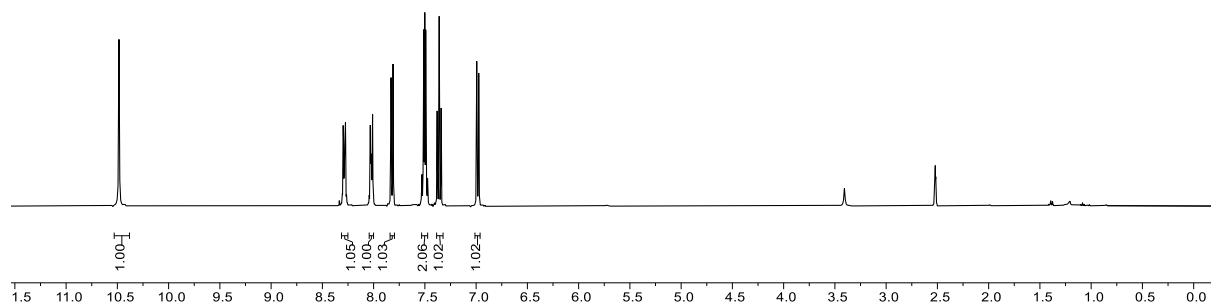

152.8441  
139.2499  
137.4236  
136.2094  
127.3826  
126.6624  
126.1617  
125.1343  
125.0512  
123.6550  
122.6778  
113.4127  
111.9986

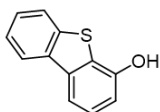

**b24**

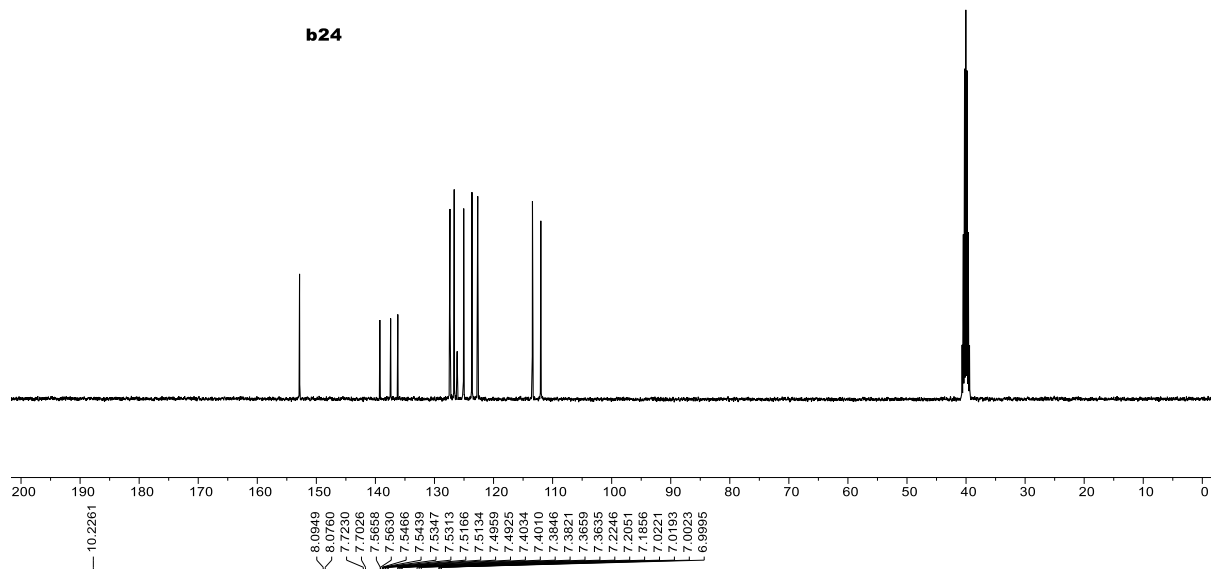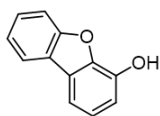

**b25**

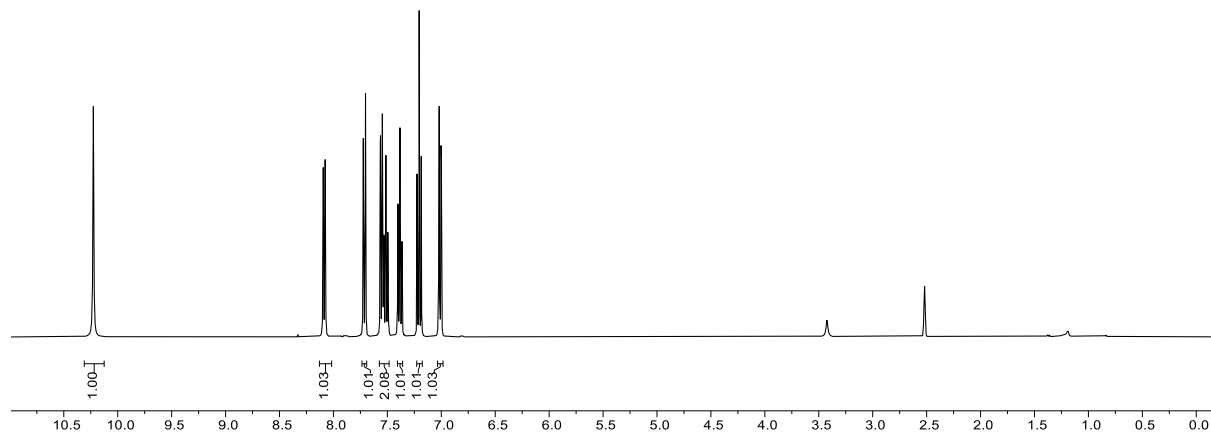

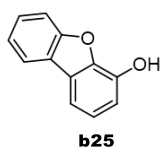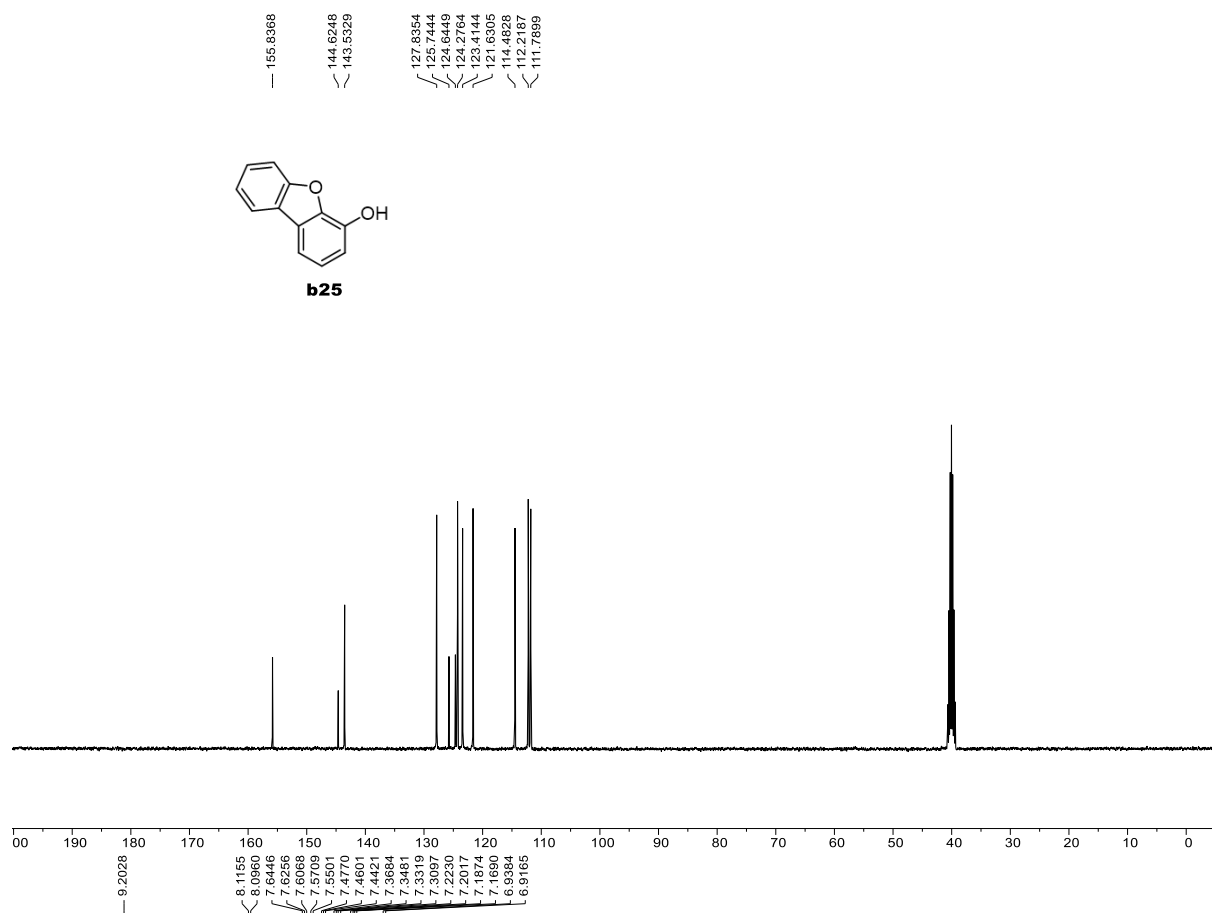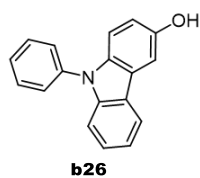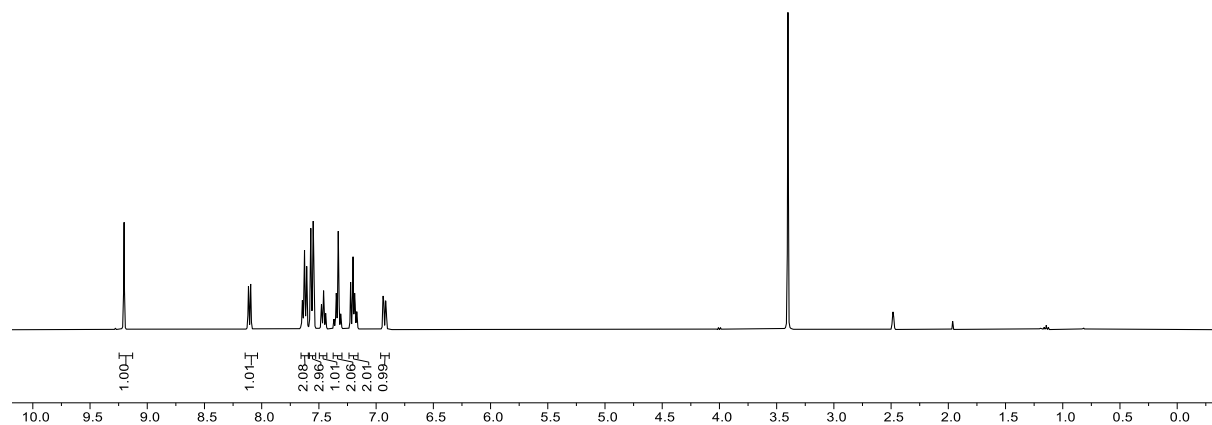

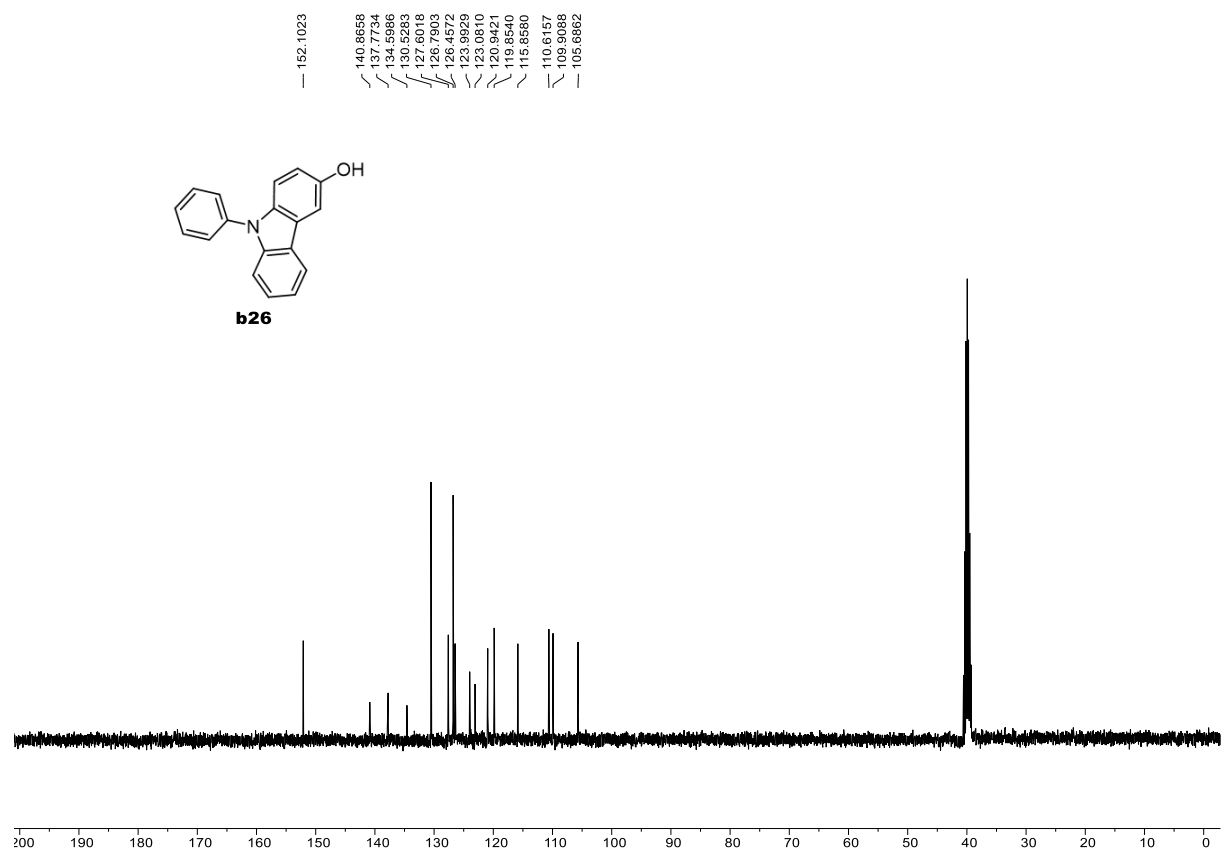

## 16. Single crystal X-ray crystallography of product **b21**

A single crystal of **b21** was mounted and tested as Zr-TCPCo. Data collection, data reduction, structure solution, and refinement method were all following the same procedure as Zr-TCPCo. Crystallographic data and structure refinement results are given in Table S3.

**Table S3. Crystallographic data of **b21****

| Compound                | <b>b21</b>                        |
|-------------------------|-----------------------------------|
| CCDC No.                | 2222429                           |
| Formula                 | C <sub>25</sub> H <sub>16</sub> O |
| Formula weight          | 332.38                            |
| Temperature (K)         | 298                               |
| Crystal system          | Trigonal                          |
| Space group             | $P3_2$                            |
| $a/\text{\AA}$          | 10.8049(2)                        |
| $c/\text{\AA}$          | 12.9961(2)                        |
| $V/\text{\AA}^3$        | 1313.97(5)                        |
| $Z$                     | 3                                 |
| $D_c/\text{g cm}^{-3}$  | 1.260                             |
| reflns coll.            | 8564                              |
| unique reflns           | 3271                              |
| $R_{\text{int}}$        | 0.0265                            |
| $R_1 [I > 2\sigma(I)]$  | 0.0601                            |
| $wR_2 [I > 2\sigma(I)]$ | 0.1701                            |
| $R_1$ (all data)        | 0.0610                            |
| $wR_2$ (all data)       | 0.1717                            |
| GOF                     | 1.078                             |

### 17. *UV-Vis spectrum of the recycled Zr-TCPCo*

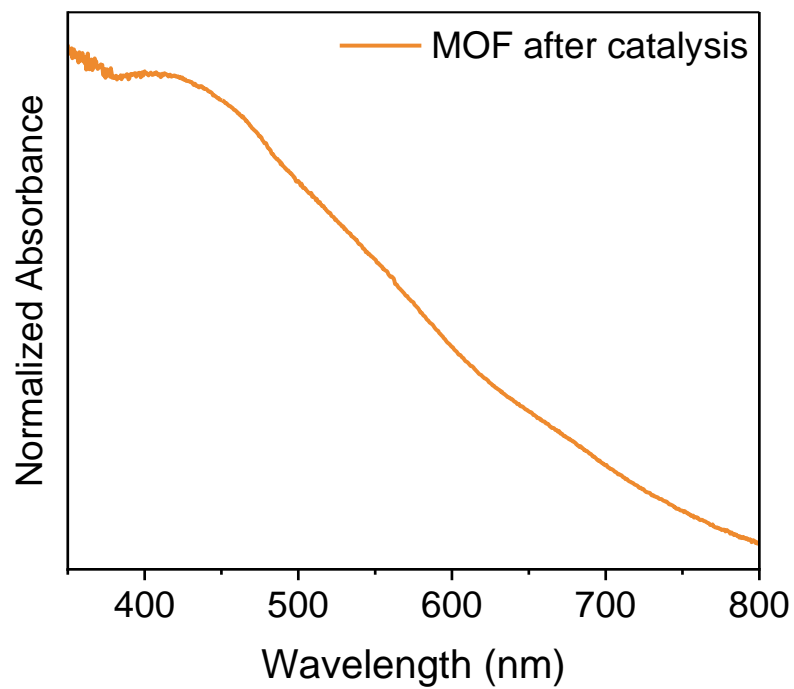

Figure S17. UV-Vis spectrum of Zr-TCPCo after catalysis.

## References

- [1] O. Delgado-Friedrichs and M. O'Keeffe, *Acta Crystallogr. Sect., A* 2003, **59**, 351–360.
- [2] M. O'Keeffe, M. A. Peskov, S. J. Ramsden and O. M. Yaghi, *Acc. Chem. Res.*, 2008, **41**, 1782–1789.
- [3] S. Roy, Z. Huang, A. Bhunia, A. Castner, A. K. Gupta, X. Zou and S. Ott, *J. Am. Chem. Soc.*, 2019, **141**, 15942–15950.
- [4] G. Sheldrick, *Acta Crystallogr. Sect., A* 2015, **71**, 3–8.
- [5] O. V Dolomanov, L. J. Bourhis, R. J. Gildea, J. A. K. Howard, H. Puschmann, *J. Appl. Crystallogr.*, 2009, **42**, 339–341.
- [6] G. Sheldrick, *Acta Crystallogr. Sect., A* 2008, **64**, 112–122.
